# Supplementary material
Source: publisher figshare collection journal article supplement (https://acs.figshare.com/ndownloader/files/14138564)

# Supporting Information

## **Palladium-catalyzed, enantioselective annulation of benzyltriflimides with allenes: Straight access to enantioenriched isoquinolines**

**Xandro Vidal, José L. Mascareñas,\* Moisés Gulías\***

**e-mail: [moises.gulias@usc.es](mailto:moises.gulias@usc.es); [joseluis.mascarenas@usc.es](mailto:joseluis.mascarenas@usc.es)**

Centro Singular de Investigación en Química Biolóxica e Materiais Moleculares (CIQUS) and  
Departamento de Química Orgánica, Universidade de Santiago de Compostela, 15782 Santiago de  
Compostela, Spain.

## Contents

---

|                                                                                             |            |
|---------------------------------------------------------------------------------------------|------------|
| <b>1. GENERAL EXPERIMENTAL PROCEDURES</b>                                                   | <b>S3</b>  |
| <b>2. EXPERIMENTAL DATA</b>                                                                 |            |
| — General procedure for the synthesis of trifyl benzylamines and trifyl allylamines         | S4         |
| — General procedure for the synthesis of trifyl alkenylamines                               | S6         |
| — General procedure for the Pd-catalyzed annulation of benzylamines/allylamines allenes     | S9         |
| — Procedure for the synthesis of azepine 3ea                                                | S12        |
| — Procedure for the Pd-catalyzed desymmetrization of benzylamines with allenes              | S13        |
| — Procedure for the kinetic resolution of benzylamines with allenes                         | S27        |
| — Pd-catalyzed annulation of a triflamide 1m (with two different aryl rings) with allene 2a | S28        |
| <b>3. NMR SPECTRA</b>                                                                       | <b>S29</b> |

## General experimental procedures

Reactions were conducted in dry solvents under argon atmosphere unless otherwise stated. Dry solvents were obtained from Aldrich and used without further purification. Toluene HPLC grade used for catalysis was obtained from Fisher Chemical. Pd(OAc)<sub>2</sub> (98%) [3375-31-3] was obtained from Strem. All other chemicals were purchased in Aldrich and used without further purification.

The abbreviation "rt" refers to reactions carried out at a temperature between 21-25 °C. Reaction mixtures were stirred using Teflon-coated magnetic stir bars. High reaction temperatures were maintained using Thermowatch-controlled heating blocks. Thin-layer chromatography (TLC) was performed on silica gel plates and components were visualized by observation under UV light, and/or by treating the plates with *p*-anisaldehyde, ninhydrin, phosphomolybdic or potassium permanganate solutions, followed by heating. Flash chromatography was carried out on silica gel. Dryings were performed with anhydrous Na<sub>2</sub>SO<sub>4</sub>.

Concentration refers to the removal of volatile solvents via distillation using a Büchi rotary evaporator followed by high vacuum.

All palladium-catalyzed reactions were carried out without particular precautions to extrude moisture or oxygen.

<sup>1</sup>H-NMR spectra were recorded at room temperature on a Varian 300 MHz or 500 MHz spectrometer in CDCl<sub>3</sub> [using CDCl<sub>3</sub> (for <sup>1</sup>H, δ = 7.26) as internal standard]. <sup>19</sup>F-NMR (282 MHz) spectra were recorded at room temperature on a Varian 300 MHz spectrometer in CDCl<sub>3</sub>. <sup>13</sup>C NMR spectra were recorded at room temperature on a Varian spectrometer in CDCl<sub>3</sub> [using CDCl<sub>3</sub> (for <sup>13</sup>C, δ = 77.160) as internal standard]. The following abbreviations were used to explain the multiplicities: s = singlet, d = doublet, t = triplet, q = quartet, m = multiplet, brs = broad singlet. Carbon types and structure assignments were determined from DEPT-NMR and two dimensional experiments (HSQC and HMBC, COSY and NOESY). NMR spectra were analyzed using MestReNova® NMR data processing software (www.mestrelab.com). Mass spectra were acquired using electrospray ionization (ESI, ion polarity positive) or atmospheric pressure chemical ionization (APCI) and were recorded at the CACTUS facility of the University of Santiago de Compostela on Bruker micrOTOF. Melting points were measured on a Büchi Melting Point B-560 apparatus.

Enantiomeric ratios (er) were determined on an Agilent HPLC 1100 Series or on a Jasco SFC 4000 series using commercially available chiral columns. All racemic products were prepared under the same procedure than the chiral products but with the employment of a racemic amino acid.

X-ray crystallographic analysis of **3ga** and **3ba** was performed at the CACTUS facility of the University of Santiago de Compostela.

Amounts of isolated products are indicated independently of the scale used.

Allene **2a** (vinylidenecyclohexane) and allene **2f** (propa-1,2-dien-1-ylcyclohexane) were purchased from Aldrich. Allene **2b** (5-vinylidenenonane), allene **2c** ((4-methylpenta-1,2-dien-3-yl)benzene), allene **2d** (1,3-diphenylpropa-1,2-diene), allene **2e** (buta-1,2-dien-1-ylbenzene), allene **2g** ((3-methylbuta-1,2-dien-1-yl)benzene) and allene **2h** ((3-methylhepta-1,2-dien-1-yl)benzene) were prepared according to procedures reported in the literature<sup>1</sup>.

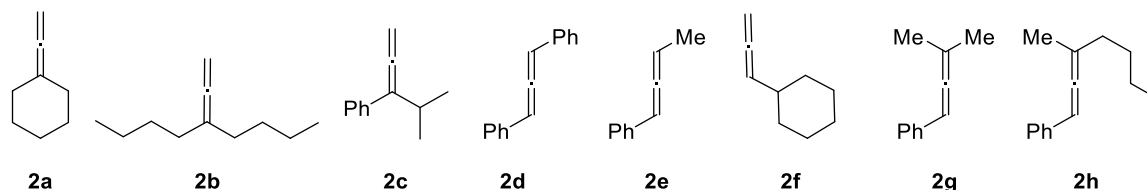

### General procedure for the synthesis of benzylamines:

Benzylamine, 1-phenylpropan-1-amine, diphenylmethanamine, bis(4-methoxyphenyl)methanamine, bis(3-methoxyphenyl)methanamine and 2-(cyclohex-1-en-1-yl)ethan-1-amine were commercially available. All non-commercial benzylamines were synthesized with a method previously reported in literature.<sup>2</sup> All spectral data recorded for known compounds were in agreement with those in the corresponding literature<sup>3</sup>.

### General procedure for the synthesis of the triflyl benzylamines (**1a-1b**, **1f-1m**) and triflyl allylamines (**1e** and **1l**), from the precursor amines, exemplified for **1a**

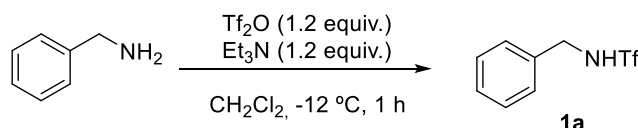

To a solution of benzylamine (2 mL, 18.31 mmol) in dichloromethane (36.6 mL) under argon atmosphere was added triethylamine (2.55 mL, 18.31 mmol) at -12°C. After the solution was stirred 5 minutes at that temperature, trifluoromethanesulfonic anhydride (3.23 mL, 19.22 mmol) was added dropwise. The reaction was stirred for 1 h at that temperature before being quenched with water. The organic layer was separated and the aqueous layer extracted with dichloromethane. The combined organic phase was washed with brine and then dried over Na<sub>2</sub>SO<sub>4</sub>. Evaporation and column chromatography on silica gel (hexanes:diethylether; 80:20) afforded **N-benzyl-1,1,1-trifluoromethanesulfonamide (1a)** as a white solid (3.97g, 91%). Mp: 43-44 °C. <sup>1</sup>H NMR (300 MHz, CDCl<sub>3</sub>) δ 7.34 – 7.18 (m, 5H), 5.10 (brs, 1H), 4.33 (d, *J* = 5.8 Hz, 2H). <sup>19</sup>F NMR (282 MHz, CDCl<sub>3</sub>) δ -77.64. <sup>13</sup>C NMR (75 MHz, CDCl<sub>3</sub>) δ 135.3 (C), 129.2 (CH), 128.8 (CH), 128.0 (CH), 119.8 (q, *J* = 320.9 Hz, C), 48.3 (CH<sub>2</sub>). HRMS [APCI]: *m/z* calculated for C<sub>8</sub>H<sub>7</sub>F<sub>3</sub>NO<sub>2</sub>S [M+H]<sup>+</sup>: 238.0144, found 238.0145.

### 1,1,1-trifluoro-*N*-(1-phenylpropyl)methanesulfonamide (**1b**)

<sup>1</sup> Allene **2b**: Kippo, T.; Fukuyama, T.; Ryu, I. *Org. Lett.* **2011**, *13*, 3864–3867. Allene **2c** and **2d**: Zhao, Z.; Racicot, L.; Murphy, G. K. *Angew. Chemie - Int. Ed.* **2017**, *56*, 11620–11623. Allene **2e**: Zhao, Z.; Racicot, L.; Murphy, G. K. *Angew. Chemie - Int. Ed.* **2017**, *56*, 11620–11623. Allene **2g** and **2h**: Ting, C.-H.; Hsu, Y.-L.; Liu, R.-S., *Chem. Commun.* **2012**, *48*, 6577-6579.

<sup>2</sup> Zhang, Y.; Lu, Z.; Desai, A.; Wulff, W. D. *Org. Lett.* **2008**, *10*, 5429–5432.

<sup>3</sup> For di-*o*-tolylmethanamine and di-*p*-tolylmethanamine: Zhang, Y.; Lu, Z.; Desai, A.; Wulff, W. D. *Org. Lett.* **2008**, *10*, 5429–5432. For bis(4-chlorophenyl)methanamine: Huang, H.; Chen, W.; Xu, Y.; Li, J. *Green Chem.* **2015**, *17*, 4715-4719.

(836 mg, 84% yield), obtained as a white solid. **<sup>1</sup>H NMR** (300 MHz, CDCl<sub>3</sub>) δ 7.34 – 7.19 (m, 3H), 7.19 – 7.12 (m, 2H), 5.50 (d, *J* = 8.8 Hz, 1H), 4.40 (q, *J* = 7.7 Hz, 1H), 1.91 – 1.70 (m, 2H), 0.84 (t, *J* = 7.4 Hz, 3H). **<sup>19</sup>F NMR** (282 MHz, CDCl<sub>3</sub>) δ -78.03. **<sup>13</sup>C NMR** (75 MHz, CDCl<sub>3</sub>) δ 140.2 (C), 129.1 (CH), 128.4 (CH), 126.3 (CH), 120.0 (d, *J* = 320.9 Hz, C), 61.6 (CH), 31.0 (CH<sub>2</sub>), 10.6 (CH<sub>3</sub>). **HRMS** [ESI]: *m/z* calculated for C<sub>10</sub>H<sub>12</sub>F<sub>3</sub>NNaO<sub>2</sub>S [M+Na]<sup>+</sup>: 290.0433, found 290.0433. Data in agreement with those reported in literature.<sup>4</sup>

#### ***N*-(2-(cyclohex-1-en-1-yl)ethyl)-1,1,1-trifluoromethanesulfonamide (1e)**

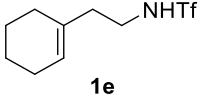 (433 mg, 84% yield), obtained as a yellow oil. **<sup>1</sup>H NMR** (300 MHz, CDCl<sub>3</sub>) δ 5.46 (brs, 1H), 5.03 (brs, 1H), 3.28 (q, *J* = 6.3 Hz, 2H), 2.14 (t, *J* = 13.5 Hz, 2H), 2.06 – 1.97 (m, 2H), 1.93 – 1.83 (m, 2H), 1.70 – 1.49 (m, 4H). **<sup>19</sup>F NMR** (282 MHz, CDCl<sub>3</sub>) δ -78.00. **<sup>13</sup>C NMR** (75 MHz, CDCl<sub>3</sub>) δ 132.8 (C), 125.7 (CH), 119.8 (q, *J* = 321.2 Hz, C), 42.1 (CH<sub>2</sub>), 38.2 (CH<sub>2</sub>), 27.7 (CH<sub>2</sub>), 25.2 (CH<sub>2</sub>), 22.7 (CH<sub>2</sub>), 22.2 (CH<sub>2</sub>). **HRMS** [ESI]: *m/z* calculated for C<sub>9</sub>H<sub>15</sub>F<sub>3</sub>NO<sub>2</sub>S [M+H]<sup>+</sup>: 258.0770, found 258.0769.

#### ***N*-benzhydryl-1,1,1-trifluoromethanesulfonamide (1f)**

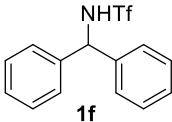 (1.62 g, 63% yield), obtained as a white solid. **<sup>1</sup>H NMR** (300 MHz, CDCl<sub>3</sub>) δ 7.31 – 7.11 (m, 10H), 5.77 (d, *J* = 8.9 Hz, 1H), 5.68 (d, *J* = 9.0 Hz, 1H). **<sup>19</sup>F NMR** (282 MHz, CDCl<sub>3</sub>) δ -77.31. **<sup>13</sup>C NMR** (75 MHz, CDCl<sub>3</sub>) δ 139.7 (C), 129.1 (CH), 128.4 (CH), 127.3 (CH), 119.5 (q, *J* = 321.1 Hz, CF<sub>3</sub>) 62.5 (CH). **HRMS** [ESI]: *m/z* calculated for C<sub>14</sub>H<sub>12</sub>F<sub>3</sub>NNaO<sub>2</sub>S [M+Na]<sup>+</sup>: 338.0443, found 338.0440. Data in agreement with those reported in literature.<sup>5</sup>

#### ***N*-(di-*o*-tolylmethyl)-1,1,1-trifluoromethanesulfonamide (1g)**

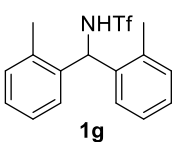 (2.60 g, 80% yield), obtained as a white solid. **<sup>1</sup>H NMR** (300 MHz, CDCl<sub>3</sub>) δ 7.17 – 7.02 (m, 8H), 6.09 (d, *J* = 8.2 Hz, 1H), 5.27 (d, *J* = 8.2 Hz, 1H), 2.21 (s, 6H). **<sup>19</sup>F NMR** (282 MHz, CDCl<sub>3</sub>) δ -77.42. **<sup>13</sup>C NMR** (75 MHz, CDCl<sub>3</sub>) δ 137.2 (C), 136.0 (C), 131.2 (CH), 128.5 (CH), 127.0 (CH), 126.5 (CH), 119.4 (q, *J* = 321.2 Hz, C), 56.7 (CH), 19.1 (CH<sub>3</sub>). **HRMS** [ESI]: *m/z* calculated for C<sub>16</sub>H<sub>16</sub>F<sub>3</sub>NNaO<sub>2</sub>S [M+Na]<sup>+</sup>: 366.0746, found 336.0749. Data in agreement with those reported in literature.<sup>5</sup>

#### ***N*-(di-*p*-tolylmethyl)-1,1,1-trifluoromethanesulfonamide (1h)**

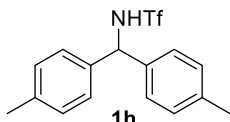 (1.95 g, 70% yield), obtained as a white solid. **<sup>1</sup>H NMR** (300 MHz, CDCl<sub>3</sub>) δ 7.09 – 6.97 (m, 8H), 5.75 – 5.54 (m, 2H), 2.22 (s, 6H). **<sup>19</sup>F NMR** (282 MHz, CDCl<sub>3</sub>) δ -77.69. **<sup>13</sup>C NMR** (75 MHz, CDCl<sub>3</sub>) δ 138.2 (C), 137.1 (C), 129.7 (CH), 127.1 (CH), 119.6 (d, *J* = 321.0 Hz, C), 62.2 (CH), 21.2 (CH<sub>3</sub>). **HRMS** [ESI]: *m/z* calculated for C<sub>16</sub>H<sub>16</sub>F<sub>3</sub>NNaO<sub>2</sub>S [M+Na]<sup>+</sup>: 366.0746, found 336.0743. Data in agreement with those reported in literature.<sup>5</sup>

#### ***N*-(bis(4-chlorophenyl)methyl)-1,1,1-trifluoromethanesulfonamide (1i)**

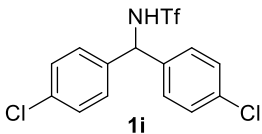 (2.92 g, 74% yield), obtained as a white solid. Mp: 105-107 °C. **<sup>1</sup>H NMR** (300 MHz, CDCl<sub>3</sub>) δ 7.31 – 7.24 (m, 4H), 7.12 – 7.04 (m, 4H), 5.73 (d, *J* = 8.8 Hz, 1H), 5.64 (d, *J* = 8.9 Hz, 1H). **<sup>19</sup>F NMR** (282 MHz, CDCl<sub>3</sub>) δ -77.64. **<sup>13</sup>C NMR** (75 MHz, CDCl<sub>3</sub>) δ 137.7 (C), 134.8 (C), 129.5 (CH), 128.6 (CH), 119.5 (q, *J* = 321.0 Hz, C), 61.4 (CH). **HRMS** [ESI]: *m/z* calculated for C<sub>14</sub>H<sub>10</sub>Cl<sub>2</sub>F<sub>3</sub>NNaO<sub>2</sub>S [M+Na]<sup>+</sup>: 405.9654, found 405.9656.

<sup>4</sup> Miyamoto, K.; Hoque, M. M.; Ogasa, S. *J. Org. Chem.* **2012**, 77, 8317–8320.

<sup>5</sup> Chu, L.; Wang, X. C.; Moore, C. E.; Rheingold, A. L.; Yu, J. Q. *J. Am. Chem. Soc.* **2013**, 135, 16344–16347.

### *N*-(bis(4-methoxyphenyl)methyl)-1,1,1-trifluoromethanesulfonamide (1j)

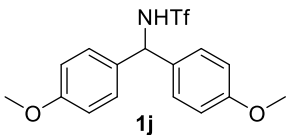 (302 mg, 24% yield), obtained as a white solid. <sup>1</sup>H NMR (300 MHz, CDCl<sub>3</sub>) δ 7.09 – 7.02 (m, 4H), 6.81 – 6.73 (m, 4H), 5.69 (s, 2H), 3.70 (s, 6H). <sup>19</sup>F NMR (282 MHz, CDCl<sub>3</sub>) δ -77.90. <sup>13</sup>C NMR (75 MHz, CDCl<sub>3</sub>) δ 159.5 (C), 132.2 (C), 128.5 (CH), 119.6 (d, *J* = 321.1 Hz, C), 114.4 (C), 61.67 (C), 55.5 (CH<sub>3</sub>). HRMS [ESI]: *m/z* calculated for C<sub>16</sub>H<sub>16</sub>F<sub>3</sub>NNaO<sub>4</sub>S [M+Na]<sup>+</sup>: 398.0644, found 398.0641. Data in agreement with those reported in literature.<sup>5</sup>

### *N*-(bis(3-methoxyphenyl)methyl)-1,1,1-trifluoromethanesulfonamide (1k)

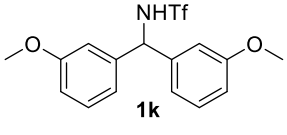 (325 mg, 84% yield), obtained as a white solid. Mp: 86-87 °C. <sup>1</sup>H NMR (300 MHz, CDCl<sub>3</sub>) δ 7.20 – 7.11 (m, 3H), 6.78 – 6.65 (m, 5H), 6.00 (d, *J* = 9.0 Hz, 1H), 5.68 (d, *J* = 8.8 Hz, 1H), 3.63 (s, 6H). <sup>19</sup>F NMR (282 MHz, CDCl<sub>3</sub>) δ -77.82. <sup>13</sup>C NMR (75 MHz, CDCl<sub>3</sub>) δ 160.0 (C), 141.2 (C), 130.1 (CH), 119.6 (d, *J* = 321.1 Hz), 119.6 (CH), 113.6 (CH), 113.2 (CH), 62.3 (CH), 55.4 (CH<sub>3</sub>). HRMS [ESI]: *m/z* calculated for C<sub>16</sub>H<sub>17</sub>F<sub>3</sub>NO<sub>4</sub>S [M+H]<sup>+</sup>: 376.0825, found 376.0825.

### *N*-allyl-1,1,1-trifluoromethanesulfonamide (1l)

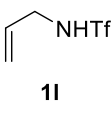 (1.35 g, 82% yield), obtained as a transparent oil. <sup>1</sup>H NMR (300 MHz, CDCl<sub>3</sub>) δ 5.86 (ddt, *J* = 17.1, 10.2, 5.8 Hz, 1H), 5.38 – 5.25 (m, 2H), 5.04 (brs, 1H), 3.97 – 3.86 (m, 2H). <sup>19</sup>F NMR (282 MHz, CDCl<sub>3</sub>) δ -78.02 (d, *J* = 16.6 Hz). <sup>13</sup>C NMR (75 MHz, CDCl<sub>3</sub>) δ 132.16 (CH), 119.72 (q, *J* = 320.8 Hz, C), 118.87 (CH<sub>2</sub>), 46.71 (CH<sub>2</sub>).

### *N*-((4-chlorophenyl)(*p*-tolyl)methyl)-1,1,1-trifluoromethanesulfonamide (1m)

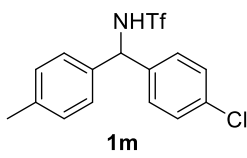 (0.57 g, 72% yield), obtained as a white solid. <sup>1</sup>H NMR (300 MHz, CDCl<sub>3</sub>) δ 7.41 – 7.03 (m, 8H), 5.82 (d, *J* = 7.2 Hz, 1H), 5.36 (d, *J* = 8.3 Hz, 1H), 2.36 (s, 3H). <sup>19</sup>F NMR (282 MHz, CDCl<sub>3</sub>) δ 77.67. <sup>13</sup>C NMR (75 MHz, CDCl<sub>3</sub>) δ 138.7 (C), 138.5 (C), 136.3 (C), 134.3 (C), 129.9 (CH), 129.2 (CH), 128.6 (CH), 127.1 (CH), 119.5 (d, *J* = 321.1 Hz, C), 61.8 (CH), 21.2 (CH<sub>3</sub>).

### General procedure for the synthesis of the triflyl alken-amines 1c-1d from the corresponding alcohols, exemplified for 1c.

2-methylprop-2-en-1-ol was commercially available. Cyclohex-1-en-1-ylmethanol was synthesized with a method previously reported in literature.<sup>6</sup> All spectral data recorded agreed with those in the corresponding literature<sup>7</sup>.

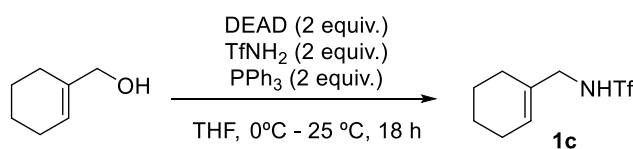

To a solution of cyclohex-1-en-1-ylmethanol (801.4 mg, 7.145 mmol), trifluoromethane sulfonamide (2.13 g, 2 equiv.), and triphenylphosphine (3.75 g, 2 equiv.) in THF (25 mL) at 0 °C was added DEAD (5.6 mL, 40% in toluene, 2 equiv.). The reaction mixture was stirred at room temperature overnight, and was quenched with water, then diluted with ethyl acetate. The combined organic phases were washed with brine and then dried over Na<sub>2</sub>SO<sub>4</sub>. Evaporation and column

<sup>5</sup> Chu, L.; Wang, X. C.; Moore, C. E.; Rheingold, A. L.; Yu, J. Q. *J. Am. Chem. Soc.* **2013**, 135, 16344–16347.

<sup>6</sup> Karaki, F.; Ohgane, K.; Fukuda, H.; Nakamura, M.; Dodo, K.; Hashimoto, Y. *Bioorganic Med. Chem.* **2014**, 22, 3587–3609.

<sup>7</sup> Hanessian, S.; Szychowski, J.; Pablo Maianti, J. *Org. Lett.* **2009**, 11, 429–432.

chromatography on silica gel (hexanes:diethylether; 90:10) afforded **N-(cyclohex-1-en-1-ylmethyl)-1,1,1-trifluoromethanesulfonamide 1c** as a yellow oil (0.80 g, 46%). **<sup>1</sup>H NMR** (300 MHz, CDCl<sub>3</sub>) δ 5.65 (brs, 1H), 4.98 (brs, 1H), 3.67 (d, *J* = 5.9 Hz, 2H), 2.01 – 1.86 (m, 4H), 1.66 – 1.44 (m, 4H). **<sup>19</sup>F NMR** (282 MHz, CDCl<sub>3</sub>) δ -77.84. **<sup>13</sup>C NMR** (75 MHz, CDCl<sub>3</sub>) δ 132.2 (C), 126.9 (CH), 119.8 (q, *J* = 321.2 Hz, C), 50.8 (CH<sub>2</sub>), 26.0 (CH<sub>2</sub>), 25.1 (CH<sub>2</sub>), 22.4 (CH<sub>2</sub>), 22.1 (CH<sub>2</sub>). **HRMS** [ESI]: *m/z* calculated for C<sub>8</sub>H<sub>12</sub>F<sub>3</sub>NNaO<sub>2</sub>S [M+Na]<sup>+</sup>: 266.0433, found 266.0432.

#### 1,1,1-trifluoro-N-(2-methylallyl)methanesulfonamide (1d)

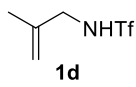 (0.94 g, 33% yield), obtained as a transparent oil. **<sup>1</sup>H NMR** (300 MHz, CDCl<sub>3</sub>) δ 5.01 (brs, 1H), 4.94 – 4.90 (m, 2H), 3.74 (d, *J* = 6.1 Hz, 2H), 1.72 (s, 3H). **<sup>19</sup>F NMR** (282 MHz, CDCl<sub>3</sub>) δ -77.83. **<sup>13</sup>C NMR** (75 MHz, CDCl<sub>3</sub>) δ 139.6 (C), 119.8 (d, *J* = 321.2 Hz, C), 113.9 (CH<sub>2</sub>), 50.1 (CH<sub>2</sub>), 19.8 (CH<sub>3</sub>). **HRMS** [ESI]: *m/z* calculated C<sub>5</sub>H<sub>9</sub>F<sub>3</sub>NO<sub>2</sub>S [M+H]<sup>+</sup>: 204.0301, found 204.0300.

#### Procedure for the synthesis of N-(2,6-difluorobenzoyl)-L-leucine<sup>8</sup>

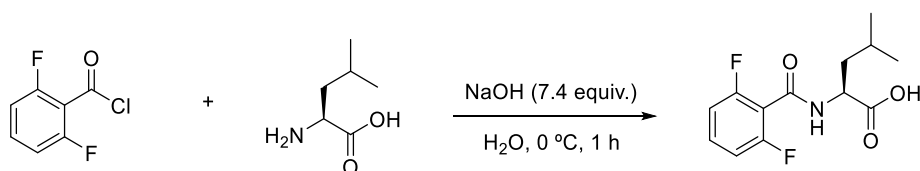

To a 25 mL round bottom flask with stir bar was added L-leucine (1.11 g, 8.496 mmol), sodium hydroxide (2.52 g, 7.4 equiv), and water (15.5 mL). The mixture was stirred at room temperature until homogeneous before cooling to 0 °C in an ice bath. Upon cooling, 2,6-difluorobenzoyl chloride (1.07 mL, 8.496 mmol) was added dropwise to the mixture. After 1 hour, the reaction mixture was allowed to warm to room temperature and pH adjusted to ~3.0 with hydrochloric acid (36% w/w). The precipitate was filtered and washed with cold water and then dried with a high-vacuum pump to give **N-(2,6-difluorobenzoyl)-L-leucine** as a white solid (2.10 g, 91 % yield). Spectral data recorded were in agreement with those in the corresponding literature.<sup>8</sup> **<sup>1</sup>H NMR** (300 MHz, DMSO-*d*<sub>6</sub>) δ 12.63 (brs, 1H), 8.97 (d, *J* = 8.1 Hz, 1H), 7.74 – 7.38 (m, 1H), 7.38 – 7.02 (m, 2H), 4.52 – 4.27 (m, 1H), 1.92 – 1.41 (m, 3H), 0.89 (t, *J* = 6.0 Hz, 6H).

<sup>8</sup> Plata, R. E.; Hill, D. E.; Haines, B. E.; Musaev, D. G.; Chu, L.; Hickey, D. P.; Sigman, M. S.; Yu, J. Q.; Blackmond, D. G. *J. Am. Chem. Soc.* **2017**, *139*, 9238–9245.

# Optimization of the conditions for the annulation of **1a** and **2a** <sup>a</sup>

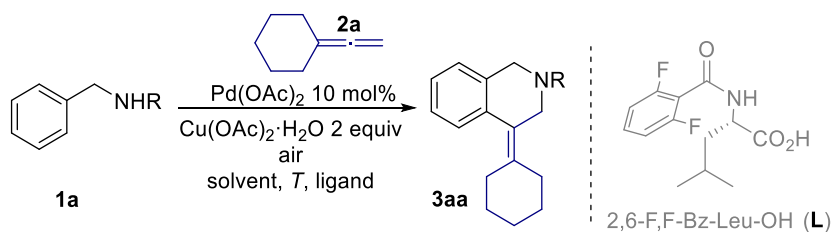

| Entry                 | R  | Solvent                | Base                                 | Temp        | Ligand <b>L</b> <sup>b</sup> | Yield <sup>c</sup>     |
|-----------------------|----|------------------------|--------------------------------------|-------------|------------------------------|------------------------|
| 1                     | Tf | t-AmyOH                | $\text{Cs}_2\text{CO}_3$ (1.5 equiv) | 80 °C       | -                            | 15%                    |
| 2                     | Tf | Dioxane                | $\text{Cs}_2\text{CO}_3$ (1.5 equiv) | 80 °C       | -                            | 23%                    |
| 3                     | Tf | DCE                    | $\text{Cs}_2\text{CO}_3$ (1.5 equiv) | 80 °C       | -                            | 24%                    |
| 4                     | Tf | $\text{CH}_3\text{CN}$ | $\text{Cs}_2\text{CO}_3$ (1.5 equiv) | 80 °C       | -                            | 9%                     |
| 5                     | Tf | Toluene                | $\text{Cs}_2\text{CO}_3$ (1.5 equiv) | 90°C        | -                            | 25%                    |
| 6 <sup>d</sup>        | Tf | Toluene                | $\text{Cs}_2\text{CO}_3$ (1.5 equiv) | 90°C        | -                            | 34%                    |
| 7                     | Tf | Toluene                | -                                    | 90 °C       | -                            | 28%                    |
| 8                     | Tf | Toluene                | $\text{Et}_3\text{N}$ (2 equiv.)     | 90 °C       | -                            | 35%                    |
| 9                     | Tf | Toluene                | $\text{Cs}_2\text{CO}_3$ (1.5 equiv) | 90 °C       | Boc-Ala-OH                   | 58%                    |
| 10                    | Tf | Toluene                | $\text{Cs}_2\text{CO}_3$ (1.5 equiv) | 90 °C       | Boc-Val-OH                   | 69%                    |
| 11                    | Tf | Toluene                | $\text{Cs}_2\text{CO}_3$ (1.5 equiv) | 90°C        | Boc-Leu-NHOMe                | 37%                    |
| 12                    | Tf | Toluene                | $\text{Cs}_2\text{CO}_3$ (1.5 equiv) | 90°C        | Boc-Phe-NHOMe                | 31%                    |
| 13                    | Tf | Toluene                | $\text{Cs}_2\text{CO}_3$ (1.5 equiv) | 90°C        | 2,6-F,F-Bz-Leu-OH            | 85%                    |
| <b>14<sup>d</sup></b> | Tf | <b>Toluene</b>         | $\text{Cs}_2\text{CO}_3$ (1.5 equiv) | <b>90°C</b> | <b>2,6-F,F-Bz-Leu-OH</b>     | <b>95%<sup>e</sup></b> |
| 15 <sup>d</sup>       | Tf | Toluene                | $\text{Cs}_2\text{CO}_3$ (1.5 equiv) | 90°C        | 2,6-F,F-Bz-Leu-OH            | 86% <sup>e,f</sup>     |
| 16 <sup>d</sup>       | Ac | Toluene                | $\text{Cs}_2\text{CO}_3$ (1.5 equiv) | 90 °C       | 2,6-F,F-Bz-Leu-OH            | No reaction            |
| 17 <sup>d</sup>       | Me | Toluene                | $\text{Cs}_2\text{CO}_3$ (1.5 equiv) | 90 °C       | 2,6-F,F-Bz-Leu-OH            | No reaction            |
| 18 <sup>d</sup>       | Tf | Toluene                | $\text{Cs}_2\text{CO}_3$ (1.5 equiv) | 90°C        | 2,6-F,F-Bz-Leu-OH            | 95% <sup>g</sup>       |
| 19                    | Tf | Toluene                | $\text{Cs}_2\text{CO}_3$ (1.5 equiv) | 90°C        | 2,6-F,F-Bz-Leu-OH            | 31% <sup>g</sup>       |

<sup>a</sup> Conditions: 0.333 mmol **1a**, 0.167 mmol of allene **2a**, 2 mL of solvent, under air, 16h. <sup>b</sup> 40% of ligand. <sup>c</sup> Yields calculated by using an internal standard. <sup>d</sup> 15 equiv of DMSO added <sup>e</sup> Isolated yield based on **2a**. <sup>f</sup> 0.5 equiv. of  $\text{Cu}(\text{OAc})_2 \cdot \text{H}_2\text{O}$ . <sup>g</sup> Reaction performed during 40 minutes.



**General procedure for the Pd-catalyzed annulation of benzylamines, alkenyl and allylamines with allenes, exemplified for 3aa:**

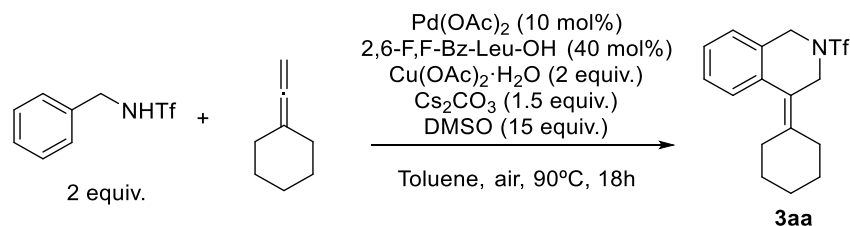

To a solution of Pd(OAc)<sub>2</sub> (3.7 mg, 10 mol%), 2,6-F,F-Bz-Leu-OH (18.1 mg, 40 mol%), Cu(OAc)<sub>2</sub>·H<sub>2</sub>O (66.7 mg, 2 equiv.), Cs<sub>2</sub>CO<sub>3</sub> (81.6 mg, 1.5 equiv.) and **1a** (79.9 mg, 0.333 mmol, 2 equiv.) in toluene (2 mL), under air atmosphere, in a Schlenk tube was added the allene **2a** (18.0 mg, 0.167 mmol). The tube was sealed with a rubber septum and an air atmosphere was injected in the flask with a balloon and a needle. The reaction was heated at 90 °C, stirred during 18 h and then cooled to room temperature. Evaporation and column chromatography on silica gel (hexanes:diethylether; 99:1) afforded **4-cyclohexylidene-2-((trifluoromethyl)sulfonyl)-1,2,3,4-tetrahydroisoquinoline (3aa)** as a white solid (54.8 mg, 95% yield) Mp: 66-67 °C. <sup>1</sup>H NMR (300 MHz, CDCl<sub>3</sub>) δ 7.28 – 7.04 (m, 4H), 4.44 (s, 2H), 4.22 (s, 2H), 2.45 – 2.34 (m, 2H), 2.32 – 2.24 (m, 2H), 1.66 – 1.49 (m, 6H). <sup>19</sup>F NMR (282 MHz, CDCl<sub>3</sub>) δ -75.78. <sup>13</sup>C NMR (75 MHz, CDCl<sub>3</sub>) δ 141.7 (C), 135.9 (C), 133.3 (C), 129.0 (CH), 127.3 (CH), 126.1 (CH), 120.4 (C), 120.3 (d, *J* = 324.0 Hz, C), 48.2 (CH<sub>2</sub>), 46.8 (CH<sub>2</sub>), 32.1 (CH<sub>2</sub>), 31.3 (CH<sub>2</sub>), 28.6 (CH<sub>2</sub>), 28.3 (CH<sub>2</sub>), 26.7 (CH<sub>2</sub>). HRMS [ESI]: *m/z* calculated for C<sub>16</sub>H<sub>19</sub>F<sub>3</sub>NO<sub>2</sub>S [M+H]<sup>+</sup>: 346.1083, found 346.1085.

**4-(nonan-5-ylidene)-2-((trifluoromethyl)sulfonyl)-1,2,3,4-tetrahydroisoquinoline (3ab)**

**3ab** (55.3 mg, 85% yield), obtained as a transparent oil. <sup>1</sup>H NMR (300 MHz, CDCl<sub>3</sub>) δ 7.26 – 7.07 (m, 4H), 4.38 (s, 2H), 4.18 (s, 2H), 2.35 – 2.06 (m, 4H), 1.53 – 1.09 (m, 8H), 0.94 – 0.85 (m, 3H), 0.85 – 0.76 (m, 3H). <sup>19</sup>F NMR (282 MHz, CDCl<sub>3</sub>) δ -75.22. <sup>13</sup>C NMR (75 MHz, Chloroform-*d*) δ 143.1 (C), 136.1 (C), 133.4 (C), 128.3 (CH), 127.5 (CH), 127.3 (CH), 126.1 (CH), 123.6 (C), 120.4 (d, *J* = 324.2 Hz, C), 48.2 (CH<sub>2</sub>), 47.2 (CH<sub>2</sub>), 33.1 (CH<sub>2</sub>), 31.8 (CH<sub>2</sub>), 31.6 (CH<sub>2</sub>), 31.2 (CH<sub>2</sub>), 23.1 (CH<sub>2</sub>), 22.8 (CH<sub>2</sub>), 14.1 (CH<sub>3</sub>), 14.0 (CH<sub>3</sub>). HRMS [ESI]: *m/z* calculated C<sub>19</sub>H<sub>27</sub>F<sub>3</sub>NO<sub>2</sub>S [M+H]<sup>+</sup>: 390.1709, found 390.1711.

**4-(2-methyl-1-phenylpropylidene)-2-((trifluoromethyl)sulfonyl)-1,2,3,4-tetrahydroisoquinoline (3ac and 3ac')**

**3ac** and **3ac'** (3.3:1 E/Z ratio of **3ac** and **3ac'**, inseparable mixture (56.8 mg, 86% yield, white solid. Mp: 79-81 °C)). <sup>1</sup>H NMR (500 MHz, CDCl<sub>3</sub>) δ 7.44 (d, *J* = 7.6 Hz, 0.23H), 7.36 – 7.22 (m, 1.15H), 7.21 – 7.13 (m, 2.54H), 7.03 – 6.98 (m, 0.45H), 6.99 – 6.89 (m, 3.08H), 6.74 – 6.66 (m, 0.77H), 6.54 (d, *J* = 8.1 Hz, 0.77H), 4.55 (s, 1.54H), 4.42 (s, 2.00H), 3.75 (s, 0.46H), 3.35 (hept, *J* = 6.8 Hz, 0.23H), 3.16 (hept, *J* = 6.9 Hz, 0.77H), 0.97 (d, *J* = 6.9 Hz, 4.62H), 0.92 (d, *J* = 6.8 Hz, 1.38H). <sup>19</sup>F NMR (470 MHz, CDCl<sub>3</sub>) δ -75.50, -75.72. <sup>13</sup>C NMR (75 MHz, CDCl<sub>3</sub>) δ 149.0 (C), 147.4 (C), 139.3 (C), 137.1 (C), 135.3 (C), 135.2 (C), 134.0 (C), 132.4 (C), 130.0 (CH), 129.9 (CH), 129.5 (CH), 128.4 (CH), 128.2 (CH), 128.1 (CH), 127.9 (CH), 127.8 (CH), 127.5 (CH), 127.1 (CH), 126.9 (CH), 126.6 (CH), 126.3 (CH), 125.5 (CH), 124.66 (C), 124.46 (C), 120.29 (d, *J* = 324.1 Hz, C), 48.80 (CH<sub>2</sub>), 48.49 (CH<sub>2</sub>), 48.23 (CH<sub>2</sub>), 46.42 (CH<sub>2</sub>), 30.98 (CH), 30.60 (CH), 21.82 (CH<sub>3</sub>), 21.71 (CH<sub>3</sub>). HRMS [ESI]: *m/z* calculated C<sub>20</sub>H<sub>20</sub>F<sub>3</sub>NNaO<sub>2</sub>S [M+Na]<sup>+</sup>: 418.1059, found 418.1056. Assignment of stereochemistry based on the observed nOe between the H<sub>a</sub> (3.16 ppm, 100%) with H<sub>b</sub> (4.42 ppm, 12.3%) and between the H<sub>c</sub> (3.35 ppm, 100%) with H<sub>d</sub> (7.44 ppm, 5.5%).

#### (E)-4-benzylidene-3-phenyl-2-((trifluoromethyl)sulfonyl)-1,2,3,4-tetrahydroisoquinoline (3ad)

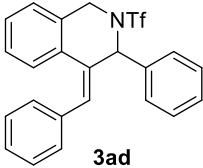**3ad** (57.9 mg, 80% yield), obtained as a white solid. Mp: 100-102 °C. <sup>1</sup>H NMR (300 MHz, CDCl<sub>3</sub>) δ 7.28 – 6.98 (m, 12H), 6.87 (d, *J* = 7.9 Hz, 2H), 6.75 (s, 1H), 5.74 (s, 1H), 4.85 (d, *J* = 17.3 Hz, 1H), 4.30 (d, *J* = 17.3 Hz, 1H). <sup>19</sup>F NMR (282 MHz, CDCl<sub>3</sub>) δ -75.65. <sup>13</sup>C NMR (75 MHz, CDCl<sub>3</sub>) δ 136.4 (C), 136.1 (C), 131.2 (C), 130.9 (CH), 130.7 (C), 130.5 (C), 129.8 (CH), 129.0 (CH), 128.9 (CH), 128.8 (CH), 128.4 (CH), 128.2 (CH), 127.9 (CH), 127.2 (CH), 126.7 (CH), 125.8 (CH), 120.2 (d, *J* = 323.5 Hz, C), 64.9 (CH), 45.8 (CH<sub>2</sub>).

**HRMS** [ESI]: *m/z* calculated for C<sub>23</sub>H<sub>18</sub>F<sub>3</sub>NNaO<sub>2</sub>S [M+Na]<sup>+</sup>: 452.0903, found 452.0901.

Assignment of stereochemistry based on the observed nOe between the H<sub>a</sub> (6.75 ppm, 100%) with H<sub>b</sub> (5.74 ppm, 11.3%).

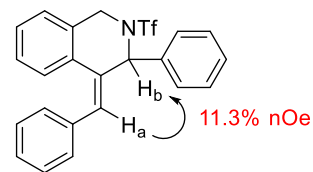

#### (E)-4-benzylidene-3-methyl-2-((trifluoromethyl)sulfonyl)-1,2,3,4-tetrahydroisoquinoline

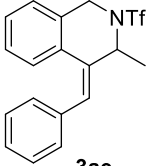**3ae** (46.2 mg, 74% yield), obtained as a yellow oil. <sup>1</sup>H NMR (300 MHz, CDCl<sub>3</sub>) δ 7.40 – 6.85 (m, 9H), 6.58 (s, 1H), 4.98 – 4.42 (m, 3H), 1.27 (d, *J* = 6.8 Hz, 3H). <sup>19</sup>F NMR (282 MHz, CDCl<sub>3</sub>) δ -77.16. <sup>13</sup>C NMR (75 MHz, CDCl<sub>3</sub>) δ 136.4 (C), 133.7 (C), 131.0 (C), 130.2 (C), 130.0 (CH), 129.0 (CH), 128.6 (CH), 128.4 (CH), 127.7 (CH), 127.5 (CH), 126.8 (CH), 125.9 (CH), 120.2 (d, *J* = 323.6 Hz, C), 58.8 (CH), 45.3 (CH<sub>2</sub>), 19.7 (CH<sub>3</sub>, brs identified by HSQC experiment). **HRMS** [ESI]: *m/z* calculated for C<sub>18</sub>H<sub>16</sub>F<sub>3</sub>NNaO<sub>2</sub>S [M+Na]<sup>+</sup>: 390.0746, found 390.0745. Assignment of stereochemistry based on the observed nOe between the H<sub>a</sub> (6.58 ppm, 100%) with H<sub>b</sub> (4.94 – 4.88 ppm, 7.9%).

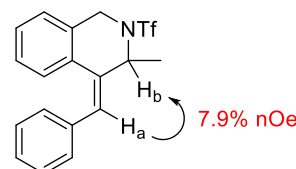

#### 4-(cyclohexylmethylene)-2-((trifluoromethyl)sulfonyl)-1,2,3,4-tetrahydroisoquinoline (3af and 3af')

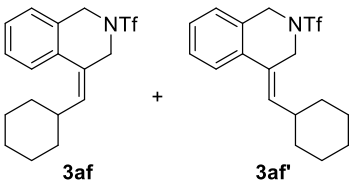**3af** and **3af'** (1.1:1 E/Z r.r. of **3af** and **3af'**, inseparable mixture (50.8 mg, 85% yield, transparent oil)) <sup>1</sup>H NMR (300 MHz, CDCl<sub>3</sub>) δ 7.58 – 7.47 (m, 0.47H), 7.36 – 7.06 (m, 3.06H), 7.05 – 6.95 (m, 0.47H), 5.95 (d, *J* = 9.6 Hz, 0.47H), 5.46 (d, *J* = 10.3 Hz, 0.53H), 4.65 – 4.50 (m, 2H), 4.33 (s, 0.94H), 4.05 (s, 1.06H), 2.60 – 2.44 (m, 0.47H), 2.35 – 2.16 (m, 0.53H), 1.74 – 1.55 (m, 5H), 1.32 – 0.99 (m, 5H). <sup>19</sup>F NMR (282 MHz, CDCl<sub>3</sub>) δ -75.81, -76.20. <sup>13</sup>C NMR (75 MHz, CDCl<sub>3</sub>) δ 138.1 (CH), 133.6 (C), 133.4 (CH), 133.1 (C), 132.2 (C), 130.3 (C), 128.0 (CH), 127.93 (CH), 127.87 (CH), 127.6 (CH), 127.5 (CH), 126.12 (CH), 126.05 (CH), 125.8 (C), 125.4 (C), 124.0 (CH), 120.13 (d, *J* = 332.4 Hz, C), 120.12 (d, *J* = 315.2 Hz, C), 52.9 (CH<sub>2</sub>), 48.5 (CH<sub>2</sub>), 48.3 (CH<sub>2</sub>), 45.7 (CH<sub>2</sub>), 37.4 (CH), 37.22 (CH), 33.15 (CH<sub>2</sub>), 33.0 (CH<sub>2</sub>), 26.0 (CH<sub>2</sub>), 25.8 (CH<sub>2</sub>), 25.6 (CH<sub>2</sub>). **HRMS** [ESI]: *m/z* calculated C<sub>17</sub>H<sub>21</sub>F<sub>3</sub>NO<sub>2</sub>S [M+H]<sup>+</sup>: 360.1240, found 360.1238. Assignment of stereochemistry based on the observed nOe between the H<sub>a</sub> (5.46 ppm, 100%) with H<sub>b</sub> (4.05 ppm, 6.5%) and between the H<sub>c</sub> (5.95 ppm, 100%) with H<sub>d</sub> (7.58 – 7.47, 8.3%).

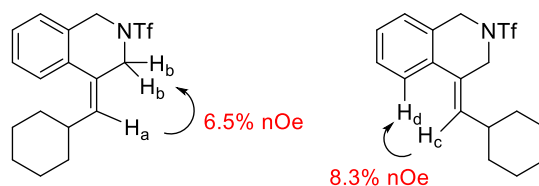

#### (E)-4-benzylidene-3,3-dimethyl-2-((trifluoromethyl)sulfonyl)-1,2,3,4-tetrahydroisoquinoline (3ag)

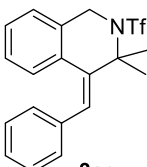**3ag** (50.7 mg, 80% yield), obtained as a white solid. Mp: 91-92 °C. <sup>1</sup>H NMR (300 MHz, CDCl<sub>3</sub>) δ 7.22 – 6.87 (m, 9H), 6.74 (s, 1H), 4.45 (s, 2H), 1.69 (s, 6H). <sup>19</sup>F NMR (282 MHz, CDCl<sub>3</sub>) δ -76.10. <sup>13</sup>C NMR (75 MHz, CDCl<sub>3</sub>) δ 141.8 (C), 136.3 (C), 135.0 (C), 134.8 (C), 129.5 (CH), 129.4 (CH), 128.29 (CH), 128.26 (CH), 128.0 (CH), 127.5 (CH), 125.7 (CH), 125.5 (CH), 119.7 (d, *J* = 324.4 Hz, C), 67.6 (C), 49.4 (CH<sub>2</sub>), 27.9 (CH<sub>3</sub>, brs). **HRMS** [ESI]:

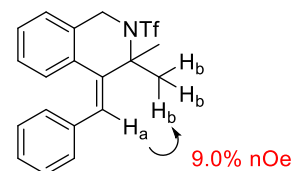

$m/z$  calculated for  $C_{19}H_{19}F_3NO_2S$   $[M+H]^+$ : 382.1083, found 382.1085. Assignment of stereochemistry based on the observed nOe between the  $H_a$  (6.74 ppm 100%) with  $H_b$  (1.69 ppm, 9.0%).

**(E)-4-benzylidene-3-butyl-3-methyl-2-((trifluoromethyl)sulfonyl)-1,2,3,4-tetrahydroisoquinoline (3ah)**

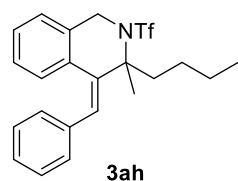

(63.8 mg, 90% yield), obtained as a transparent oil.  $^1H$  NMR (300 MHz,  $CDCl_3$ )  $\delta$  7.23 – 6.83 (m, 9H), 6.67 (s, 1H), 4.46 (s, 2H), 2.15 – 1.97 (m, 1H), 1.70 (s, 3H), 1.36 – 1.07 (m, 4H), 0.77 (t,  $J$  = 7.1 Hz, 3H).  $^{19}F$  NMR (282 MHz,  $CDCl_3$ )  $\delta$  -75.93.  $^{13}C$  NMR (75 MHz,  $CDCl_3$ )  $\delta$  138.9 (C), 136.4 (C), 135.2 (C), 134.6 (C), 129.5 (CH), 129.2 (CH), 128.7 (CH), 128.3 (CH), 128.0 (CH), 127.5 (CH), 127.3 (CH), 125.4 (CH), 119.8 (d,  $J$  =

324.9 Hz, C), 71.2 (C), 50.2 ( $CH_2$ ), 26.8 ( $CH_2$ ), 25.0 ( $CH_3$ , brs), 22.8 ( $CH_2$ ), 14.0 ( $CH_3$ ).

**HRMS** [ESI]:  $m/z$  calculated for  $C_{22}H_{25}F_3NO_2S$   $[M+H]^+$ : 424.1553, found 424.1553.

Assignment of stereochemistry based on the observed nOe between the  $H_a$  (6.67 ppm, 100%) with  $H_b$  (0.77 ppm, 5.7%).

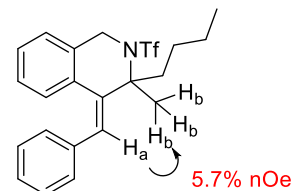

**4-cyclohexylidene-2-((trifluoromethyl)sulfonyl)-1,2,3,4,5,6,7,8-octahydroisoquinoline (3ca)**

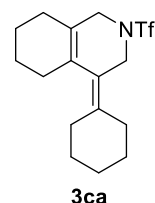

Reaction performed at 105 °C. (41.5 mg, 71% yield), obtained as a transparent oil.  $^1H$  NMR (300 MHz,  $CDCl_3$ )  $\delta$  4.03 (s, 2H), 3.84 (s, 2H), 2.36 – 2.17 (m, 6H), 2.09 – 1.97 (m, 2H), 1.78 – 1.65 (m, 2H), 1.65 – 1.51 (m, 8H).  $^{19}F$  NMR (282 MHz,  $CDCl_3$ )  $\delta$  -76.01.  $^{13}C$  NMR (75 MHz,  $CDCl_3$ )  $\delta$  139.6 (C), 132.0 (C), 128.4 (C), 123.0 (C), 120.3 (d,  $J$  = 324.0 Hz, C), 49.3 ( $CH_2$ ), 46.4 ( $CH_2$ ), 33.4 ( $CH_2$ ), 32.1 ( $CH_2$ ), 31.4 ( $CH_2$ ), 28.33 ( $CH_2$ ), 28.28 ( $CH_2$ ), 27.8 ( $CH_2$ ), 26.7 ( $CH_2$ ), 23.7 ( $CH_2$ ), 22.4 ( $CH_2$ ). **HRMS** [ESI]:  $m/z$

calculated for  $C_{16}H_{23}F_3NO_2S$   $[M+H]^+$ : 350.1396, found 350.1399.

**(E)-4-benzylidene-3,3-dimethyl-2-((trifluoromethyl)sulfonyl)-1,2,3,4,5,6,7,8-octahydroisoquinoline (3cg)**

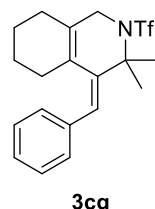

(58.2 mg, 90% yield), obtained as a transparent oil.  $^1H$  NMR (300 MHz,  $CDCl_3$ )  $\delta$  7.27 – 7.10 (m, 5H), 6.48 (s, 1H), 3.84 (s, 2H), 2.12 – 2.02 (m, 2H), 1.73 – 1.65 (m, 2H), 1.64 (s, 6H), 1.62 – 1.52 (m, 2H), 1.46 – 1.35 (m, 2H).  $^{19}F$  NMR (282 MHz,  $CDCl_3$ )  $\delta$  -75.94.  $^{13}C$  NMR (75 MHz,  $CDCl_3$ )  $\delta$  142.6 (C), 137.7 (C), 132.7 (C), 132.5 (C), 129.0 (CH), 128.2 (CH), 127.4 (CH), 123.2 (CH), 120.0 (d,  $J$  = 325.1 Hz, C), 65.8 (C), 49.9 ( $CH_2$ ), 28.0 ( $CH_2$ ), 27.6 ( $CH_2$ ), 27.3

(brs,  $CH_3$ ), 22.8 ( $CH_2$ ), 22.4 ( $CH_2$ ). **HRMS** [APCI]:  $m/z$  calculated for  $C_{19}H_{22}F_3NO_2S$   $[M+H]^+$ : 386.1396, found 386.1395. Assignment of stereochemistry based on the observed nOe between the  $H_a$  (6.48 ppm, 100%) with  $H_b$  (1.64 ppm).

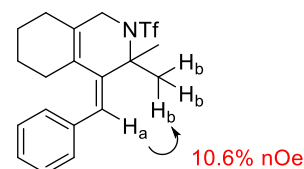

**3-cyclohexylidene-5-methyl-1-((trifluoromethyl)sulfonyl)-1,2,3,6-tetrahydropyridine (3da)**

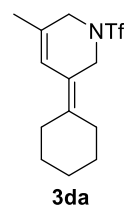

(45.7 mg, 88% yield), obtained as a transparent oil.  $^1H$  NMR (300 MHz,  $CDCl_3$ )  $\delta$  6.33 – 6.28 (m, 1H), 4.10 (s, 2H), 3.88 (s, 2H), 2.32 – 2.08 (m, 4H), 1.74 (s, 3H), 1.55 – 1.43 (m, 6H).  $^{19}F$  NMR (282 MHz,  $CDCl_3$ )  $\delta$  -76.34.  $^{13}C$  NMR (75 MHz,  $CDCl_3$ )  $\delta$  137.4 (C), 129.3 (C), 120.6 (CH), 120.2 (d,  $J$  = 324.0 Hz, C), 118.6 (C), 49.1 ( $CH_2$ ), 44.9 ( $CH_2$ ), 30.7 ( $CH_2$ ), 29.7 ( $CH_2$ ), 28.11 ( $CH_2$ ), 28.08 ( $CH_2$ ), 26.8 ( $CH_2$ ), 20.8 ( $CH_2$ ). **HRMS** [APCI]:  $m/z$  calculated for  $C_{13}H_{19}F_3NO_2S$   $[M+H]^+$ : 310.1083, found 310.1083.

## Procedure for the synthesis of 1-cyclohexylidene-3-((trifluoromethyl)sulfonyl)-2,3,4,5,6,7,8,9-octahydro-1H-benzo[d]azepine 3ea

### Method A

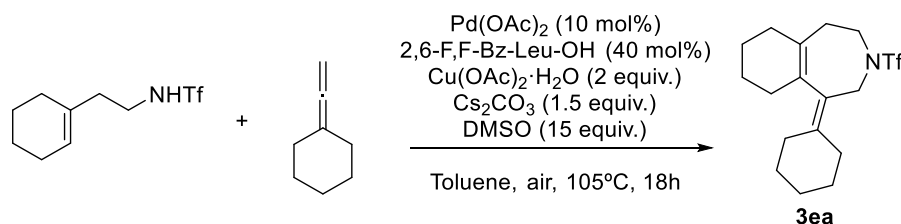

To a solution of Pd(OAc)<sub>2</sub> (3.7 mg, 10 mol%), 2,6-F<sub>2</sub>Bz-Leu-OH (18.1 mg, 40 mol%), Cu(OAc)<sub>2</sub>·H<sub>2</sub>O (66.7 mg, 2 equiv.), Cs<sub>2</sub>CO<sub>3</sub> (81.6 mg, 1.5 equiv.) and triflimide **1e** (43.0 mg, 0.167 mmol, 1 equiv.) in toluene (2 mL) under air atmosphere in a Schlenk tube was added the allene **2a** (18.0 mg, 0.167 mmol). The tube was sealed with a rubber septum and an air atmosphere was injected in the flask with a balloon and a needle. The reaction was heated at 105 °C, stirred during 18 h and then cooled to room temperature. Evaporation and column chromatography on silica gel (hexanes:diethylether; 99:1) afforded **1-cyclohexylidene-3-((trifluoromethyl)sulfonyl)-2,3,4,5,6,7,8,9-octahydro-1H-benzo[d]azepine 3ea** as a yellow oil (50.4 mg, 83% yield). NMR characterization performed at 110 °C due to the presence of conformers. <sup>1</sup>H NMR (500 MHz, DMSO-*d*<sub>6</sub>) δ 3.68 (s, 2H), 3.09 (t, *J* = 6.2 Hz, 2H), 1.87 – 1.76 (m, 4H), 1.69 (t, *J* = 6.3 Hz, 2H), 1.66 – 1.55 (m, 4H), 1.24 – 1.09 (m, 10H). <sup>19</sup>F NMR (470 MHz, DMSO-*d*<sub>6</sub>) δ -76.03. <sup>13</sup>C NMR (126 MHz, DMSO-*d*<sub>6</sub>) δ 139.6 (C), 132.5 (C), 130.2 (C), 125.8 (C), 119.4 (q, *J* = 324.7 Hz, C), 48.2 (CH<sub>2</sub>), 44.4 (CH<sub>2</sub>), 33.6 (CH<sub>2</sub>), 31.4 (CH<sub>2</sub>), 29.4 (CH<sub>2</sub>), 29.2 (CH<sub>2</sub>), 28.7 (CH<sub>2</sub>), 27.1 (CH<sub>2</sub>), 26.6 (CH<sub>2</sub>), 25.3 (CH<sub>2</sub>), 21.9 (CH<sub>2</sub>), 21.8 (CH<sub>2</sub>). HRMS [ESI]: *m/z* calculated for C<sub>17</sub>H<sub>25</sub>F<sub>3</sub>NO<sub>2</sub>S [M+H]<sup>+</sup>: 364.1553, found 364.1549.

### Method B

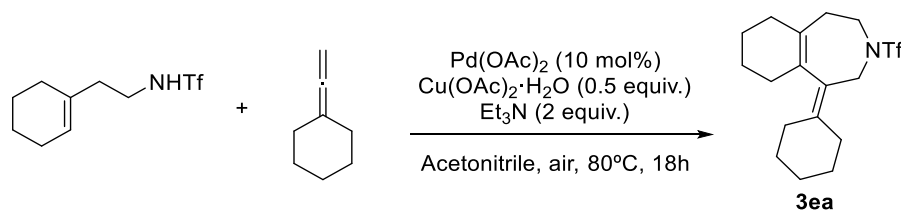

To a solution of Pd(OAc)<sub>2</sub> (3.7 mg, 10 mol%), Cu(OAc)<sub>2</sub>·H<sub>2</sub>O (16.7 mg, 0.5 equiv.), Et<sub>3</sub>N (46 μL, 2 equiv.) and **1e** (43.0 mg, 0.167 mmol, 1 equiv.) in acetonitrile (2 mL) under air atmosphere in a Schlenk tube was added the allene **2a** (18.0 mg, 0.167 mmol). The tube was sealed with a rubber septum and an air atmosphere was injected in the flask with a balloon and a needle. The reaction was heated at 80 °C, stirred during 18 h and then cooled to room temperature. Evaporation and column chromatography on silica gel (hexanes:diethylether; 99:1) afforded **1-cyclohexylidene-3-((trifluoromethyl)sulfonyl)-2,3,4,5,6,7,8,9-octahydro-1H-benzo[d]azepine 3ea** as a yellow oil (37.8 mg, 62% yield).

## Procedure for the Pd-catalyzed desymmetrization of benzylamides with allenes **2**

### Method A (using excess of amide)

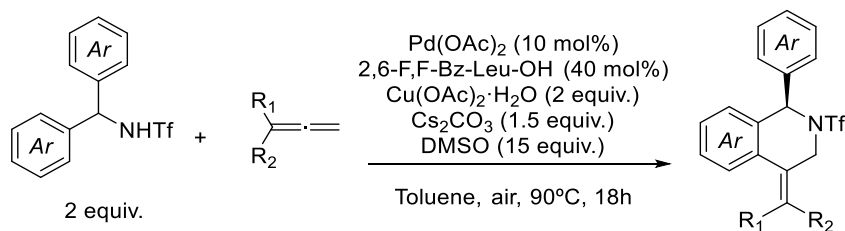

To a solution of  $\text{Pd(OAc)}_2$  (3.7 mg, 10 mol%), 2,6-F,F-Bz-Leu-OH (18.1 mg, 40 mol%),  $\text{Cu(OAc)}_2\cdot\text{H}_2\text{O}$  (66.7 mg, 2 equiv.),  $\text{Cs}_2\text{CO}_3$  (81.6 mg, 1.5 equiv.) and triflimides **1** (0.333 mmol, 2 equiv.) in toluene (2 mL) under air atmosphere in a Schlenk tube was added the allene **2** (0.167 mmol). The tube was sealed with a rubber septum and an air atmosphere was injected in the flask with a balloon and a needle. The reaction was heated at 90 °C, stirred during 18 h and then cooled to room temperature. Evaporation and column chromatography on silica gel (hexanes:diethylether; 99:1) afforded adducts **3**.

### Method B (using excess of allene)

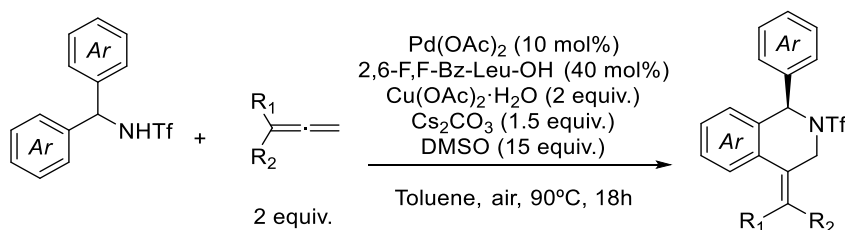

To a solution of  $\text{Pd(OAc)}_2$  (3.7 mg, 10 mol%), 2,6-F,F-Bz-Leu-OH (18.1 mg, 40 mol%),  $\text{Cu(OAc)}_2\cdot\text{H}_2\text{O}$  (66.7 mg, 2 equiv.),  $\text{Cs}_2\text{CO}_3$  (81.6 mg, 1.5 equiv.) and **1** (0.167 mmol, 2 equiv.) in toluene (2 mL) under air atmosphere in a Schlenk tube was added the allene **2** (0.333 mmol). The tube was sealed with a rubber septum and an air atmosphere was injected in the flask with a balloon and a needle. The reaction was heated at 90 °C, stirred during 18 h and then cooled to room temperature. Evaporation and column chromatography on silica gel (hexanes:diethylether; 99:1) afforded compounds **3**.

*Racemic products were obtained using the racemic 2,6-F,F-Bz-Leu-OH*

#### 4-cyclohexylidene-1-phenyl-2-((trifluoromethyl) sulfonyl)-1,2,3,4-tetrahydroisoquinoline (3fa)

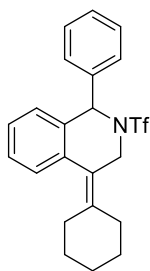

**3fa**

Method A: (60.1 mg, 85% yield), obtained as a white solid. Mp: 97-99 °C. <sup>1</sup>H NMR (300 MHz, CDCl<sub>3</sub>) δ 7.35 – 7.05 (m, 9H), 5.92 (s, 1H), 4.40 (d, *J* = 13.6 Hz, 1H), 4.10 (d, *J* = 13.4 Hz, 1H), 2.38 – 2.25 (m, 1H), 2.18 – 2.02 (m, 2H), 1.96 – 1.79 (m, 1H), 1.50 – 1.28 (m, 4H), 1.00 – 0.75 (m, 2H). <sup>19</sup>F NMR (282 MHz, CDCl<sub>3</sub>) δ -75.18. <sup>13</sup>C NMR (75 MHz, CDCl<sub>3</sub>) δ 140.9 (C), 138.5 (C), 137.3 (C), 135.2 (C), 129.8 (CH), 128.4 (CH), 127.9 (CH), 127.7 (CH), 127.31 (CH), 127.26 (CH), 127.2 (CH), 120.1 (q, *J* = 324.4 Hz, C), 119.7 (C), 62.4 (CH), 46.5 (CH<sub>2</sub>), 31.9 (CH<sub>2</sub>), 30.6 (CH<sub>2</sub>), 27.8 (CH<sub>2</sub>), 27.2 (CH<sub>2</sub>), 26.4 (CH<sub>2</sub>). **HRMS** [ESI]: *m/z* calculated for C<sub>22</sub>H<sub>23</sub>F<sub>3</sub>NO<sub>2</sub>S [M+H]<sup>+</sup>: 422.1396, found 422.1386.

Enantioselectivity was determined by chiral HPLC analysis on Chiralpak IB at rt (Hexane, 0.5 mL/min).

Racemic sample

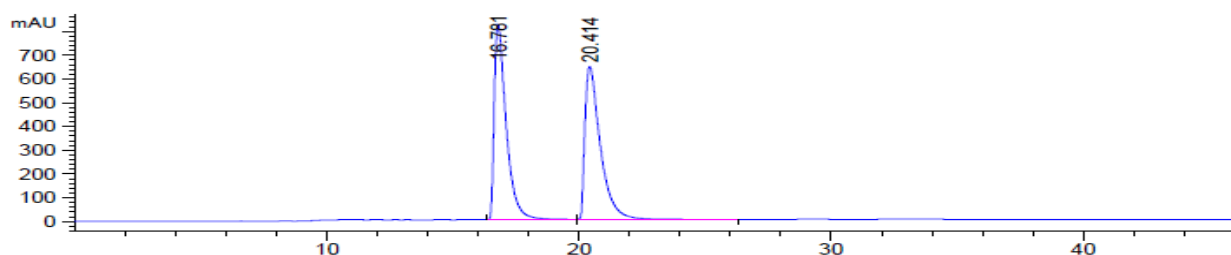

Signal 2: DAD1 B, Sig=254,4 Ref=off

| Peak # | RetTime [min] | Type | Width [min] | Area [mAU*s] | Height [mAU] | Area %  |
|--------|---------------|------|-------------|--------------|--------------|---------|
| 1      | 16.781        | BB   | 0.4998      | 2.72435e4    | 823.86963    | 49.7619 |
| 2      | 20.414        | BB   | 0.6477      | 2.75042e4    | 644.70233    | 50.2381 |

Totals : 5.47478e4 1468.57196

Asymmetric sample (94 : 6 e.r.)

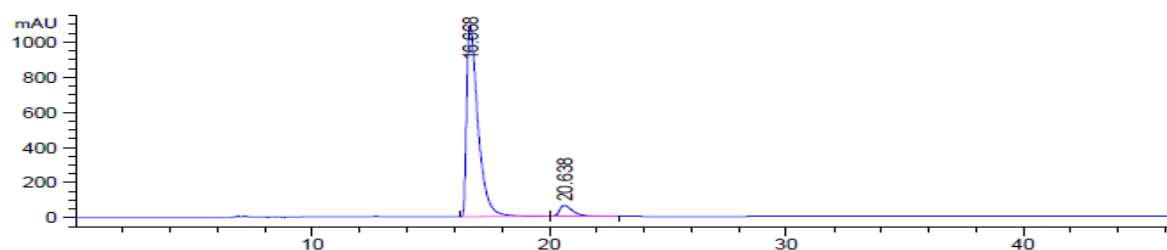

Signal 2: DAD1 B, Sig=254,4 Ref=off

| Peak # | RetTime [min] | Type | Width [min] | Area [mAU*s] | Height [mAU] | Area %  |
|--------|---------------|------|-------------|--------------|--------------|---------|
| 1      | 16.668        | BB   | 0.5091      | 3.63547e4    | 1090.09351   | 93.6232 |
| 2      | 20.638        | BB   | 0.5843      | 2476.17505   | 63.03621     | 6.3768  |

Totals : 3.88308e4 1153.12972

#### 4-(nonan-5-ylidene)-1-phenyl-2-((trifluoromethyl)sulfonyl)-1,2,3,4-tetrahydroisoquinoline (3fb)

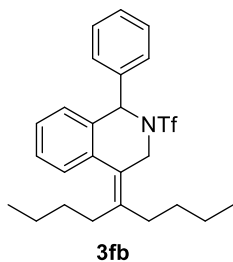

Method A: (73.2 mg, 94% yield), obtained as a yellow oil. **<sup>1</sup>H NMR** (300 MHz, CDCl<sub>3</sub>) δ 7.36 – 7.02 (m, 10H), 5.90 (s, 1H), 4.29 (d, *J* = 13.8 Hz, 1H), 4.11 (d, *J* = 13.9 Hz, 1H), 2.16 – 1.99 (m, 1H), 1.92 – 1.75 (m, 3H), 1.25 – 0.82 (m, 8H), 0.80 – 0.68 (m, 6H). **<sup>19</sup>F NMR** (282 MHz, CDCl<sub>3</sub>) δ -75.62. **<sup>13</sup>C NMR** (75 MHz, CDCl<sub>3</sub>) δ 141.9 (C), 138.2 (C), 136.8 (C), 135.3 (C), 129.1 (CH), 128.4 (CH), 128.1 (CH), 127.8 (CH), 127.4 (CH), 127.3 (CH), 127.2 (CH), 122.5 (C), 120.1 (d, *J* = 324.4 Hz, C), 62.3 (CH), 46.7 (CH<sub>2</sub>), 32.9 (CH<sub>2</sub>), 31.2 (CH<sub>2</sub>), 31.0 (CH<sub>2</sub>), 29.7 (CH<sub>2</sub>), 23.03 (CH<sub>2</sub>), 22.97 (CH<sub>2</sub>), 14.13 (CH<sub>3</sub>), 14.07 (CH<sub>3</sub>). **HRMS** [ESI]: *m/z* calculated for C<sub>25</sub>H<sub>31</sub>F<sub>3</sub>NO<sub>2</sub>S [M+H]<sup>+</sup>: 466.2022, found 466.2015.

Enantioselectivity was determined by chiral SFC analysis on Phenomenex *i*-Cellulose-5 at 40 °C (CO<sub>2</sub>: MeOH = 98:02, 0.5 mL/min).

Racemic sample

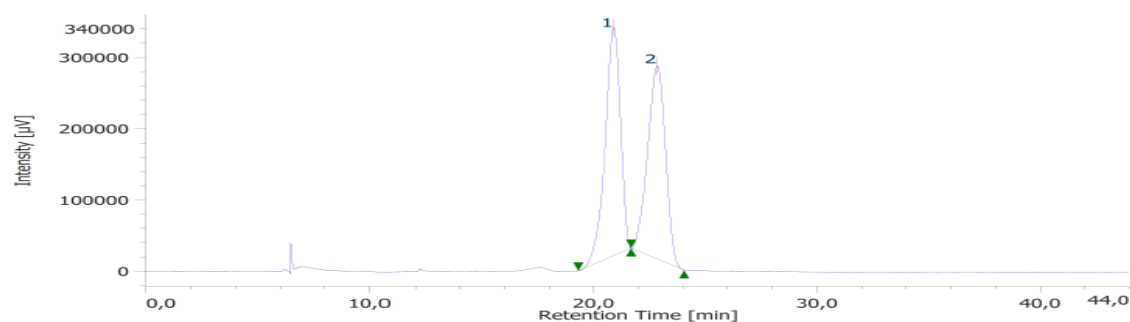

Channel Name 222,0nm Sampling Interval 200 [msec]

| # | Peak Name | CH | tR [min] | Area [μV·sec] | Height [μV] | Area%  | Height% | Quantity | NTP  | Resolution | Symmetry Factor | Warning |
|---|-----------|----|----------|---------------|-------------|--------|---------|----------|------|------------|-----------------|---------|
| 1 | Unknown   | 9  | 20.887   | 15244033      | 319865      | 50.484 | 54.195  | N/A      | 4537 | 1.436      | 0.826           |         |
| 2 | Unknown   | 9  | 22.833   | 14951856      | 270352      | 49.516 | 45.805  | N/A      | 3821 | N/A        | 0.909           |         |

Asymmetric sample (95 : 5 e.r.)

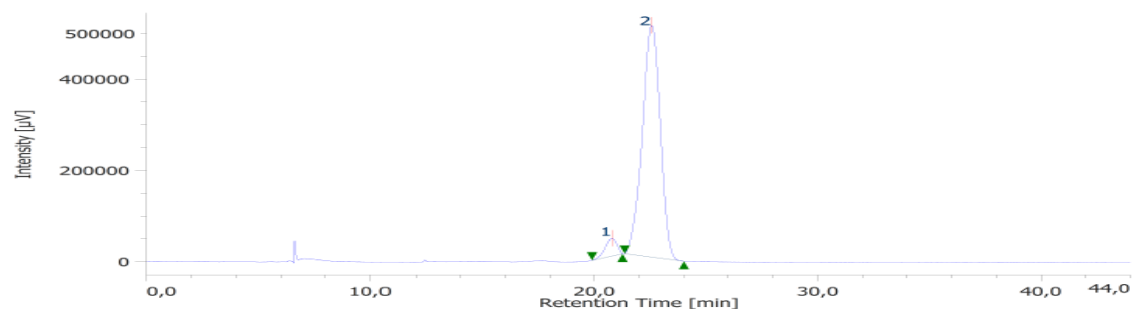

Channel Name 222,0nm Sampling Interval 200 [msec]

| # | Peak Name | CH | tR [min] | Area [μV·sec] | Height [μV] | Area%  | Height% | Quantity | NTP  | Resolution | Symmetry Factor | Warning |
|---|-----------|----|----------|---------------|-------------|--------|---------|----------|------|------------|-----------------|---------|
| 1 | Unknown   | 9  | 20.790   | 1419800       | 38483       | 4.739  | 7.048   | N/A      | 6876 | 1.423      | 0.786           |         |
| 2 | Unknown   | 9  | 22.560   | 28540687      | 507501      | 95.261 | 92.952  | N/A      | 3665 | N/A        | 0.922           |         |

#### 4-(2-methyl-1-phenylpropylidene)-1-phenyl-2-((trifluoromethyl)sulfonyl)-1,2,3,4-tetrahydroisoquinoline

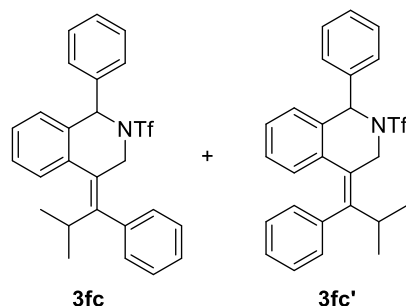

Method A performed at 70 °C over 72h: (1:4.9 E/Z r.r. of **3fc** and **3fc'**, inseparable mixture (51.8 mg, 66% yield, white solid, Mp: 143-145 °C)). **<sup>1</sup>H NMR** (300 MHz, CDCl<sub>3</sub>) δ 7.46 – 6.57 (m, 14H), 5.98 – 5.86 (m, 2H), 4.58 – 4.32 (m, 0.34 H), 3.76 (s, 1.66H), 3.09 (hept, *J* = 6.8 Hz, 0.83H), 2.81 (hept, *J* = 7.0 Hz, 0.17H), 0.93 (d, *J* = 6.9 Hz, 3H), 0.41 (d, *J* = 6.8 Hz, 0.51H), 0.30 (d, *J* = 6.7 Hz, 2.49H). **<sup>19</sup>F NMR** (282 MHz, CDCl<sub>3</sub>) δ -75.34. **<sup>13</sup>C NMR** (75 MHz, CDCl<sub>3</sub>) δ 147.5 (C), 138.5 (C), 137.0 (C), 134.6 (C), 130.6 (C), 129.8 (C), 129.2 (CH), 128.64 (CH), 128.55 (CH), 128.4 (CH), 128.2 (CH), 128.1 (CH), 127.9 (CH), 127.8 (CH), 127.6 (CH), 127.4 (CH), 127.3 (CH), 123.8 (C), 120.1 (d, *J* = 324.3 Hz, C), 62.4 (CH), 62.2 (CH), 48.3 (CH<sub>2</sub>), 45.7 (CH<sub>2</sub>), 30.5 (CH), 22.3 (CH<sub>3</sub>), 21.5 (CH<sub>3</sub>), 20.1 (CH<sub>3</sub>), 19.9 (CH<sub>3</sub>). **HRMS [ESI]:** *m/z* calculated for C<sub>26</sub>H<sub>25</sub>F<sub>3</sub>NO<sub>2</sub>S [M+H]<sup>+</sup>: 472.1555, found 472.1549.

Assignment of stereochemistry based on the observed nOe between the H<sub>a</sub> (3.09 ppm, 100%) with H<sub>b</sub> (7.45 – 7.28 ppm, 9.4%) and the H<sub>c</sub> (2.81 ppm, 100%) with the H<sub>d</sub> (4.58 – 4.32 ppm, 4.1%).

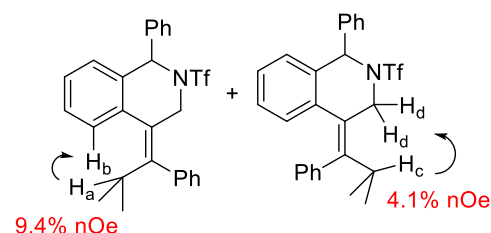

Enantioselectivity was determined by chiral SFC analysis on Phenomenex Cellulose-2 at 40 °C (CO<sub>2</sub> : MeOH = 98:02, 1 mL/min).

Racemic sample

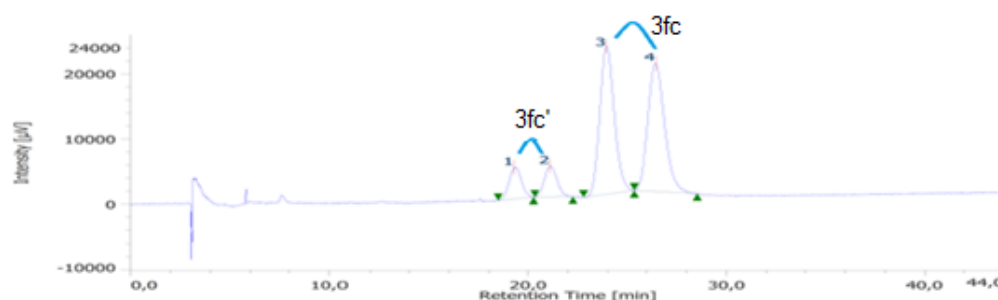

Channel Name 254,0nm Sampling Interval 200 [msec]

| # | Peak Name | CH | tR [min] | Area [μV·sec] | Height [μV] | Area%  | Height% | Quantity | NTP  | Resolution | Symmetry Factor | Warning |
|---|-----------|----|----------|---------------|-------------|--------|---------|----------|------|------------|-----------------|---------|
| 1 | Unknown   | 11 | 19.283   | 210552        | 4866        | 7.704  | 9.360   | N/A      | 4391 | 1.550      | 1.087           |         |
| 2 | Unknown   | 11 | 21.100   | 207639        | 4747        | 7.598  | 9.132   | N/A      | 5065 | 2.240      | 1.126           |         |
| 3 | Unknown   | 11 | 23.933   | 1165726       | 22705       | 42.656 | 43.678  | N/A      | 5023 | 1.728      | 1.176           |         |
| 4 | Unknown   | 11 | 26.410   | 1148947       | 19664       | 42.042 | 37.829  | N/A      | 4808 | N/A        | 1.208           |         |

Asymmetric sample (**3fc**, 95 : 5 e.r., **3fc'**, 94 : 6 e.r.)

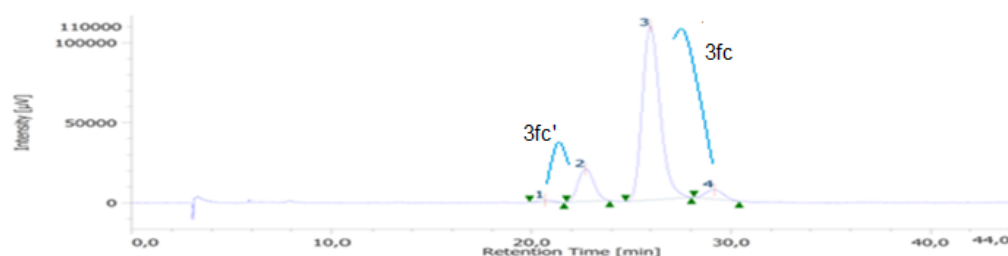

Channel Name 254,0nm Sampling Interval 200 [msec]

| # | Peak Name | CH | tR [min] | Area [μV·sec] | Height [μV] | Area%  | Height% | Quantity | NTP  | Resolution | Symmetry Factor | Warning |
|---|-----------|----|----------|---------------|-------------|--------|---------|----------|------|------------|-----------------|---------|
| 1 | Unknown   | 11 | 20.670   | 70695         | 1474        | 0.846  | 1.081   | N/A      | 3968 | 1.455      | 1.069           |         |
| 2 | Unknown   | 11 | 22.703   | 1117247       | 20266       | 13.362 | 14.862  | N/A      | 3715 | 2.079      | 1.107           |         |
| 3 | Unknown   | 11 | 25.937   | 6805087       | 108729      | 81.388 | 79.732  | N/A      | 4059 | 1.910      | 1.266           |         |
| 4 | Unknown   | 11 | 29.137   | 368302        | 5898        | 4.405  | 4.325   | N/A      | 4529 | N/A        | 1.108           |         |



**(Z)-4-(cyclohexylmethylene)-1-phenyl-2-((trifluoromethyl)sulfonyl)-1,2,3,4-tetrahydroisoquinoline (3ff)**

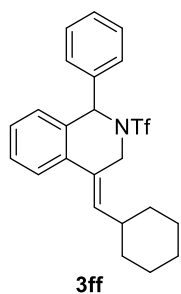

Method A: (58.9 mg, 81% yield), obtained as a transparent oil. **<sup>1</sup>H NMR** (300 MHz, CDCl<sub>3</sub>) δ 7.65 (d, *J* = 8.0 Hz, 1H), 7.29 – 7.09 (m, 7H), 6.98 (d, *J* = 7.1 Hz, 1H), 6.07 (s, 1H), 5.97 (d, *J* = 9.6 Hz, 1H), 4.60 (d, *J* = 16.6 Hz, 1H), 3.80 (d, *J* = 16.6 Hz, 1H), 2.23 – 2.01 (m, 1H), 1.76 – 0.89 (m, 10H). **<sup>19</sup>F NMR** (282 MHz, CDCl<sub>3</sub>) δ -76.64. **<sup>13</sup>C NMR** (75 MHz, CDCl<sub>3</sub>) δ 138.3 (C), 133.2 (C), 132.9 (CH), 128.83 (CH), 128.76 (CH), 128.6 (CH), 128.4 (CH), 128.0 (CH), 127.4 (CH), 125.0 (C), 123.9 (CH), 119.8 (q, *J* = 323.2 Hz, C), 61.2 (CH), 42.3 (CH<sub>2</sub>), 37.1 (CH), 32.7 (CH<sub>2</sub>), 32.6 (CH<sub>2</sub>), 26.0 (CH<sub>2</sub>), 25.8 (CH<sub>2</sub>), 25.8 (CH<sub>2</sub>). **HRMS [ESI]**:

*m/z* calculated for C<sub>23</sub>H<sub>25</sub>F<sub>3</sub>NO<sub>2</sub>S [M+H]<sup>+</sup>: 436.1553, found 436.1550.

Assignment of stereochemistry based on the observed nOe between the H<sub>a</sub> (5.97 ppm, 100%) with H<sub>b</sub> (7.65 ppm, 11.8%).

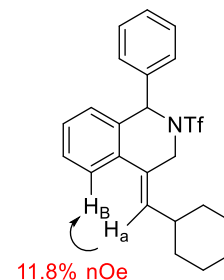

Enantioselectivity was determined by chiral SFC analysis on Phenomenex Cellulose-1 at 40 °C (CO<sub>2</sub> : MeOH = 98:02, 1 mL/min).

Racemic sample

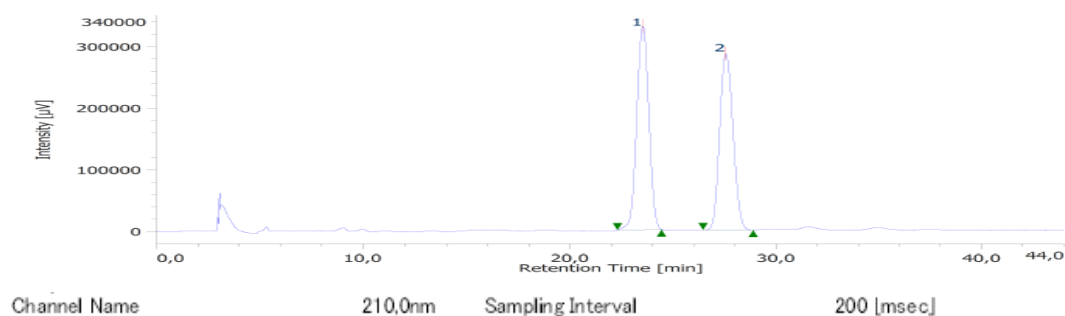

| # | Peak Name | CH | tR [min] | Area [μV·sec] | Height [μV] | Area%  | Height% | Quantity | NTP  | Resolution | Symmetry Factor | Warning |
|---|-----------|----|----------|---------------|-------------|--------|---------|----------|------|------------|-----------------|---------|
| 1 | Unknown   | 5  | 23.537   | 13523659      | 330453      | 51.207 | 53.629  | N/A      | 7432 | 3.505      | 0.995           |         |
| 2 | Unknown   | 5  | 27.570   | 12886049      | 285726      | 48.793 | 46.371  | N/A      | 8227 | N/A        | 1.115           |         |

Asymmetric sample (93 : 7 e.r.)

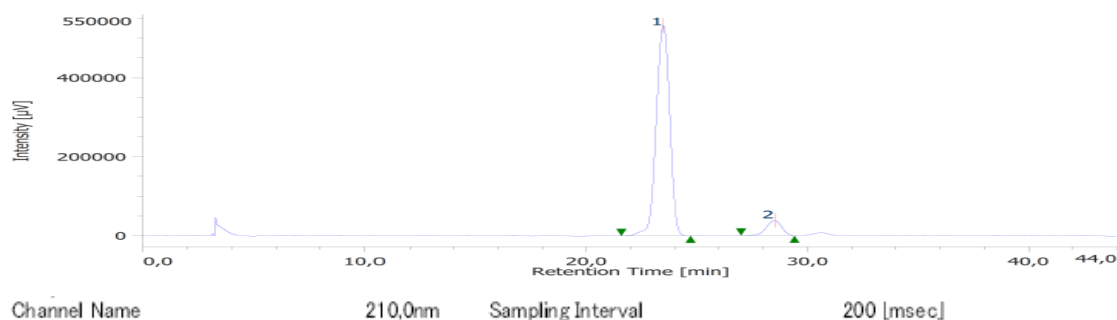

| # | Peak Name | CH | tR [min] | Area [μV·sec] | Height [μV] | Area%  | Height% | Quantity | NTP  | Resolution | Symmetry Factor | Warning |
|---|-----------|----|----------|---------------|-------------|--------|---------|----------|------|------------|-----------------|---------|
| 1 | Unknown   | 5  | 23.467   | 22591968      | 532175      | 92.535 | 93.358  | N/A      | 6934 | 4.194      | 0.959           |         |
| 2 | Unknown   | 5  | 28.507   | 1822624       | 37862       | 7.465  | 6.642   | N/A      | 7906 | N/A        | 0.912           |         |

#### 4-cyclohexylidene-8-methyl-1-(*o*-tolyl)-2-((trifluoromethyl)sulfonyl)-1,2,3,4-tetrahydroisoquinoline (3ga)

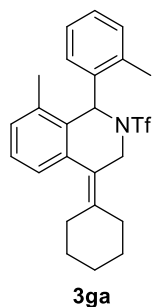

Method B: (44.9 mg, 66% yield), obtained as a white solid. Mp: 145-147 °C. <sup>1</sup>H NMR (300 MHz, CDCl<sub>3</sub>) δ 7.20 – 7.08 (m, 4H), 7.03 (d, *J* = 6.9 Hz, 1H), 6.88 (t, *J* = 7.0 Hz, 1H), 6.74 (d, *J* = 7.8 Hz, 1H), 6.29 (s, 1H), 4.41 (d, *J* = 16.4 Hz, 1H), 3.84 (d, *J* = 16.4 Hz, 1H), 2.55 (s, 3H), 2.28 (t, *J* = 11.7 Hz, 1H), 2.15 (s, 3H), 2.04 – 1.75 (m, 2H), 1.65 – 1.26 (m, 7H). <sup>19</sup>F NMR (282 MHz, CDCl<sub>3</sub>) δ -75.78. <sup>13</sup>C NMR (75 MHz, CDCl<sub>3</sub>) δ 138.7 (C), 136.5 (C), 134.4 (C), 134.1 (C), 131.9 (C), 131.5 (CH), 130.0 (CH), 128.9 (CH), 128.5 (CH), 128.2 (CH), 127.3 (CH), 125.6 (CH), 121.0 (C), 119.6 (d, *J* = 325.2 Hz, C), 57.9 (CH), 46.2 (CH<sub>2</sub>), 32.4 (CH<sub>2</sub>), 30.8 (CH<sub>2</sub>), 28.1 (CH<sub>2</sub>), 26.9 (CH<sub>2</sub>), 26.6 (CH<sub>2</sub>), 20.5 (CH<sub>3</sub>), 18.6 (CH<sub>3</sub>). **HRMS** [ESI]: *m/z* calculated for C<sub>24</sub>H<sub>27</sub>F<sub>3</sub>NO<sub>2</sub>S [M+H]<sup>+</sup>: 450.1709, found 450.1715.

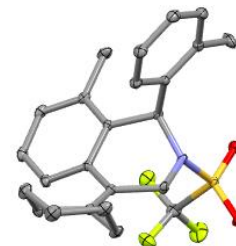

The structure of this compound (**3ga**) was confirmed by X-Ray diffraction analysis (CCDC: 1877409).

*Enantioselectivity was determined by chiral HPLC analysis on Chiralpak IB at rt (Hexane, 0.5 mL/min).*

Racemic sample

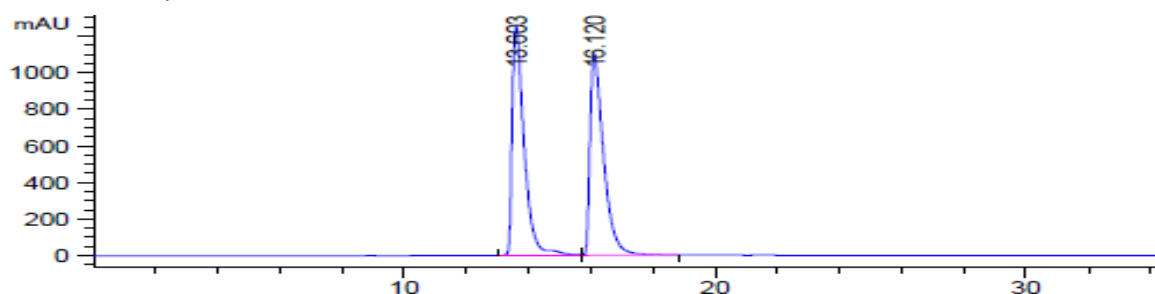

Signal 2: DAD1 B, Sig=254,4 Ref=off

| Peak # | RetTime [min] | Type | Width [min] | Area [mAU*s] | Height [mAU] | Area %  |
|--------|---------------|------|-------------|--------------|--------------|---------|
| 1      | 13.603        | BV R | 0.3945      | 3.35972e4    | 1252.76074   | 50.2071 |
| 2      | 16.120        | VB   | 0.4492      | 3.33200e4    | 1100.64124   | 49.7929 |

Totals : 6.69172e4 2353.40198

Asymmetric sample (97 : 3 e.r.)

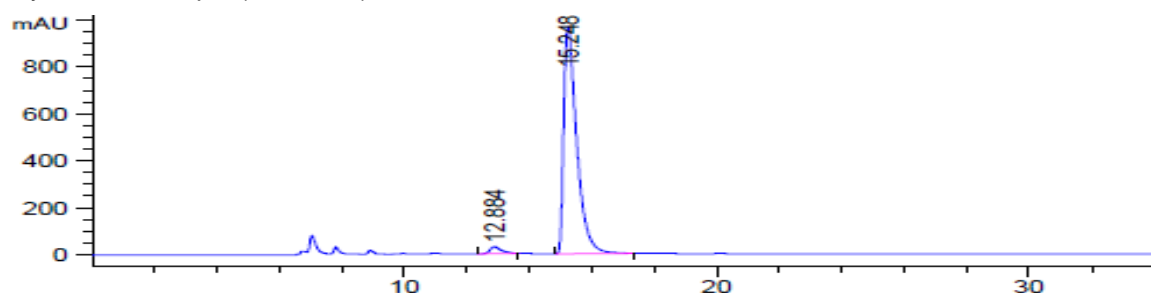

Signal 2: DAD1 B, Sig=254,4 Ref=off

| Peak # | RetTime [min] | Type | Width [min] | Area [mAU*s] | Height [mAU] | Area %  |
|--------|---------------|------|-------------|--------------|--------------|---------|
| 1      | 12.884        | BB   | 0.3744      | 776.70538    | 30.16767     | 2.7075  |
| 2      | 15.248        | BB   | 0.4320      | 2.79104e4    | 969.03998    | 97.2925 |

Totals : 2.86871e4 999.20765

**(Z)-4-(cyclohexylmethylene)-8-methyl-1-(o-tolyl)-2-((trifluoromethyl)sulfonyl)-1,2,3,4-tetrahydroisoquinoline (3gf)**

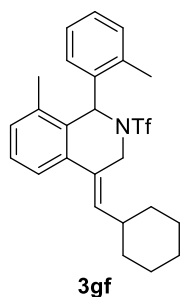

Method B: (73.5 mg, 95% yield), obtained as a transparent oil.  $^1\text{H NMR}$  (300 MHz,  $\text{CDCl}_3$ )  $\delta$  7.52 (d,  $J = 8.0$  Hz, 1H), 7.22 – 7.07 (m, 3H), 7.03 – 6.83 (m, 2H), 6.65 (d,  $J = 7.8$  Hz, 1H), 6.30 (s, 1H), 5.97 (d,  $J = 9.7$  Hz, 1H), 4.61 (d,  $J = 17.6$  Hz, 1H), 3.88 (d,  $J = 17.6$  Hz, 1H), 2.57 (s, 3H), 2.05 (m, 1H), 1.98 (s, 3H), 1.77 – 1.53 (m, 4H), 1.49 – 1.38 (m, 1H), 1.24 – 1.01 (m, 5H).  $^{19}\text{F NMR}$  (282 MHz,  $\text{CDCl}_3$ )  $\delta$  -75.74.  $^{13}\text{C NMR}$  (75 MHz,  $\text{CDCl}_3$ )  $\delta$  138.4 (C), 134.3 (C), 133.6 (C), 133.4 (C), 132.9 (C), 132.6 (CH), 131.7 (CH), 129.7 (CH), 129.3 (CH), 129.0 (CH), 128.1 (CH), 125.9 (C), 125.8 (CH), 121.5 (CH), 119.7 (d,  $J = 324.8$  Hz, C), 56.5 (CH), 42.9 ( $\text{CH}_2$ ), 37.2 (CH), 32.6 ( $\text{CH}_2$ ), 32.3 ( $\text{CH}_2$ ), 26.0 ( $\text{CH}_2$ ), 25.9 ( $\text{CH}_2$ ), 25.8 ( $\text{CH}_2$ ), 20.0 ( $\text{CH}_3$ ), 18.7 ( $\text{CH}_3$ ).

**HRMS [ESI]:**  $m/z$  calculated for  $\text{C}_{25}\text{H}_{29}\text{F}_3\text{NO}_2\text{S}$   $[\text{M}+\text{H}]^+$ : 464.1866, found 464.1862.

Assignment of stereochemistry based on the observed nOe between the  $\text{H}_a$  (5.97 ppm, 100%) with  $\text{H}_b$  (7.52 ppm, 13.1%).

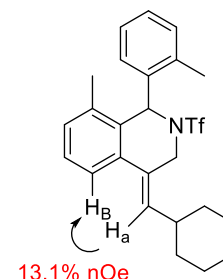

Enantioselectivity was determined by chiral SFC analysis on Phenomenex Cellulose-1 at 40 °C ( $\text{CO}_2$  : MeOH = 99:01, 1 mL/min).

Racemic sample

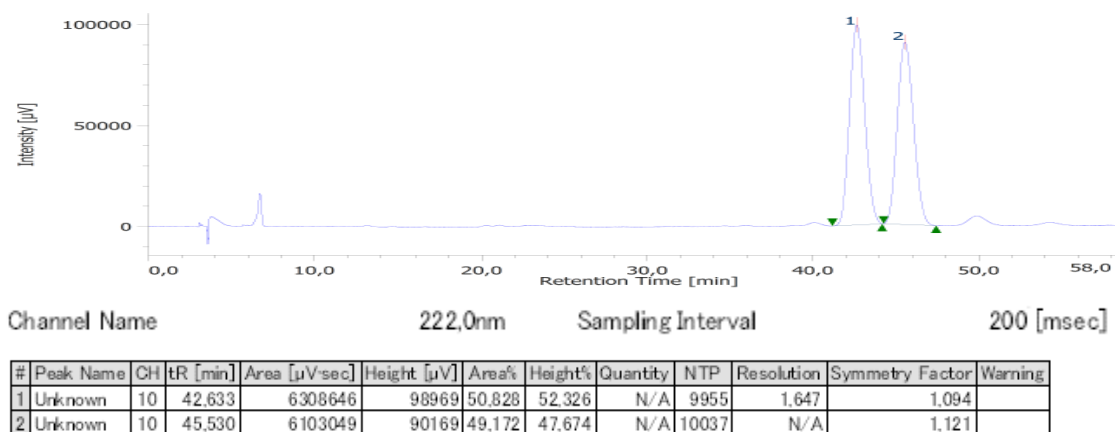

Asymmetric sample (98 : 2 e.r.)

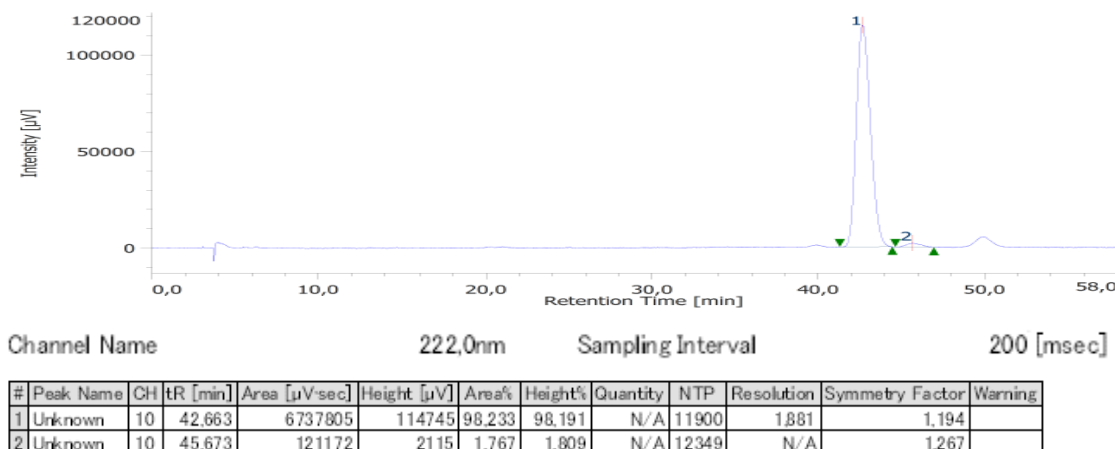

#### 4-cyclohexylidene-6-methyl-1-(*p*-tolyl)-2-((trifluoromethyl)sulfonyl)-1,2,3,4-tetrahydroisoquinoline (3ha)

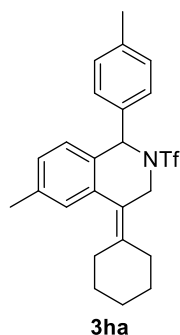

Method A: (71.2 mg, 95% yield), obtained as a transparent oil. <sup>1</sup>H NMR (300 MHz, CDCl<sub>3</sub>) δ 7.22 – 6.87 (m, 7H), 5.85 (s, 1H), 4.35 (d, *J* = 13.5 Hz, 1H), 4.08 (d, *J* = 14.0 Hz, 1H), 2.31 (s, 4H), 2.24 (s, 3H), 2.12 (d, *J* = 13.0 Hz, 2H), 1.90 (t, *J* = 11.6 Hz, 1H), 1.53 – 1.28 (m, 4H), 0.96 (brs, 2H). <sup>19</sup>F NMR (282 MHz, CDCl<sub>3</sub>) δ -75.16. <sup>13</sup>C NMR (75 MHz, CDCl<sub>3</sub>) δ 140.4 (C), 137.4 (C), 137.4 (C), 135.9 (C), 134.9 (C), 134.5 (C), 130.3 (CH), 129.0 (CH), 127.8 (CH), 127.4 (CH), 127.1 (CH), 120.2 (d, *J* = 324.2 Hz, C), 120.0 (C), 62.1 (CH), 46.3 (CH<sub>2</sub>), 32.0 (CH<sub>2</sub>), 30.7 (CH<sub>2</sub>), 27.9 (CH<sub>2</sub>), 27.3 (CH<sub>2</sub>), 26.5 (CH<sub>2</sub>), 21.6 (CH<sub>3</sub>), 21.1 (CH<sub>3</sub>). HRMS [ESI]: *m/z* calculated for C<sub>24</sub>H<sub>27</sub>F<sub>3</sub>NO<sub>2</sub>S [M+H]<sup>+</sup>: 450.1709, found 450.1707.

Enantioselectivity was determined by chiral SFC analysis on Phenomenex Cellulose-1 at 40 °C (CO<sub>2</sub> : MeOH = 98:02, 1 mL/min).

Racemic sample

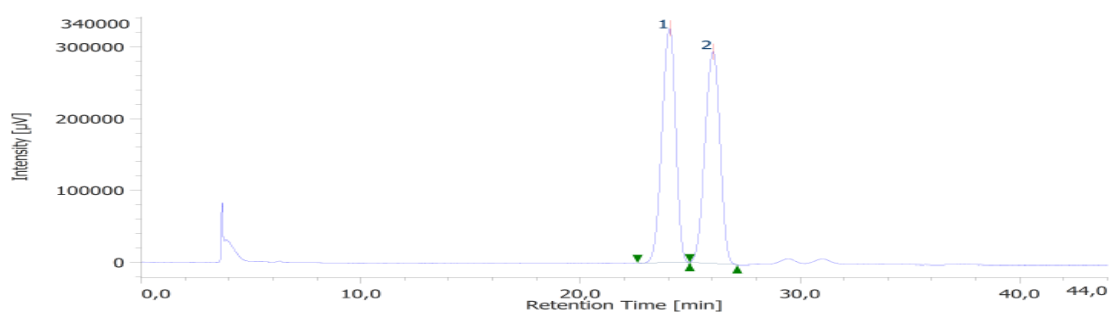

Channel Name 210.0nm Sampling Interval 200 [msec]

| # | Peak Name | CH | tR [min] | Area [μV·sec] | Height [μV] | Area%  | Height% | Quantity | NTP  | Resolution | Symmetry Factor | Warning |
|---|-----------|----|----------|---------------|-------------|--------|---------|----------|------|------------|-----------------|---------|
| 1 | Unknown   | 5  | 24.047   | 14221311      | 326263      | 50.358 | 52.512  | N/A      | 6651 | 1.611      | 0.913           |         |
| 2 | Unknown   | 5  | 26.030   | 14019082      | 295054      | 49.642 | 47.488  | N/A      | 6526 | N/A        | 0.935           |         |

Asymmetric sample (94 : 6 e.r.)

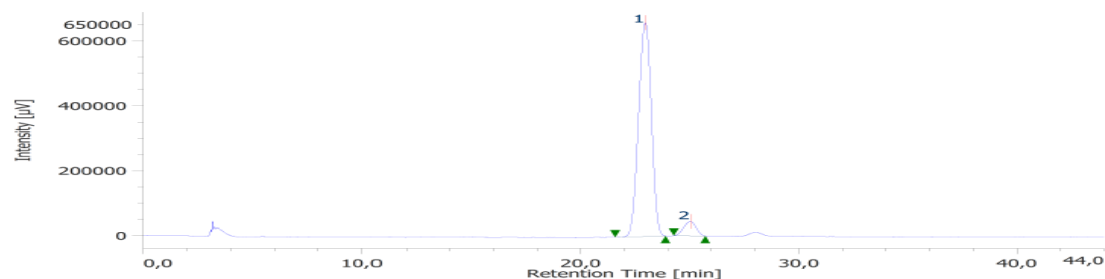

Channel Name 210.0nm Sampling Interval 200 [msec]

| # | Peak Name | CH | tR [min] | Area [μV·sec] | Height [μV] | Area%  | Height% | Quantity | NTP  | Resolution | Symmetry Factor | Warning |
|---|-----------|----|----------|---------------|-------------|--------|---------|----------|------|------------|-----------------|---------|
| 1 | Unknown   | 5  | 22.953   | 26775063      | 657766      | 93.968 | 93.772  | N/A      | 6934 | 1.893      | 0.955           |         |
| 2 | Unknown   | 5  | 25.017   | 1718772       | 43685       | 6.032  | 6.228   | N/A      | 8536 | N/A        | 0.941           |         |

### 6-methyl-4-(nonan-5-ylidene)-1-(p-tolyl)-2-((trifluoromethyl)sulfonyl)-1,2,3,4-tetrahydroisoquinoline (3hb)

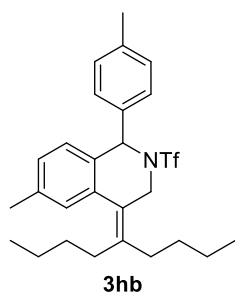

Method A: (76.2 mg, 92% yield), obtained as a white solid. Mp: 56-58 °C. <sup>1</sup>H NMR (300 MHz, CDCl<sub>3</sub>) δ 7.20 – 6.89 (m, 7H), 5.84 (s, 1H), 4.25 (d, *J* = 13.8 Hz, 1H), 4.08 (d, *J* = 14.0 Hz, 1H), 2.32 (s, 3H), 2.20 (s, 3H), 1.91 – 1.76 (m, 3H), 1.31 – 1.11 (m, 7H), 1.11 – 0.97 (m, 2H), 0.80 (t, *J* = 6.9 Hz, 3H), 0.71 (t, *J* = 7.1 Hz, 3H). <sup>19</sup>F NMR (282 MHz, CDCl<sub>3</sub>) δ -75.52. <sup>13</sup>C NMR (75 MHz, CDCl<sub>3</sub>) δ 141.4 (C), 137.50 (C), 137.46 (C), 135.4 (C), 135.0 (C), 134.1 (C), 129.7 (CH), 129.0 (CH), 127.7 (CH), 127.4 (CH), 127.0 (CH), 122.7 (C), 120.1 (d, *J* = 324.4 Hz, C), 62.0 (CH), 46.6 (CH<sub>2</sub>), 32.9 (CH<sub>2</sub>), 31.2 (CH<sub>2</sub>), 31.1 (CH<sub>2</sub>), 29.7 (CH<sub>2</sub>), 23.00 (CH<sub>2</sub>), 22.97 (CH<sub>2</sub>), 21.6 (CH<sub>3</sub>), 21.1 (CH<sub>3</sub>), 14.2 (CH<sub>3</sub>), 14.1 (CH<sub>3</sub>). **HRMS** [ESI]: calculated for C<sub>27</sub>H<sub>35</sub>F<sub>3</sub>NO<sub>2</sub>S [M+H]<sup>+</sup>: 494.2335, found 494.2337.

Enantioselectivity was determined by chiral SFC analysis on Phenomenex Cellulose-2 at 40 °C (CO<sub>2</sub> : MeOH = 98:02, 1 mL/min).

#### Racemic sample

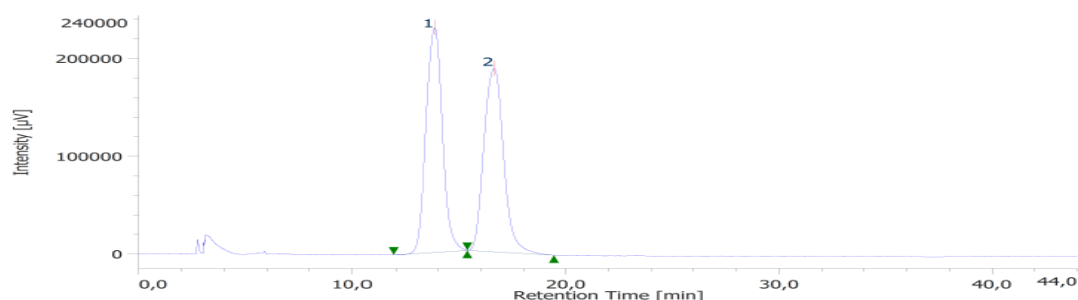

Channel Name 210,0nm Sampling Interval 200 [msec]

| # | Peak Name | CH | tR [min] | Area [μV·sec] | Height [μV] | Area%  | Height% | Quantity | NTP  | Resolution | Symmetry Factor | Warning |
|---|-----------|----|----------|---------------|-------------|--------|---------|----------|------|------------|-----------------|---------|
| 1 | Unknown   | 5  | 13.827   | 12282853      | 229944      | 50.397 | 55.069  | N/A      | 1512 | 1.783      | 1.054           |         |
| 2 | Unknown   | 5  | 16.610   | 12089469      | 187611      | 49.603 | 44.931  | N/A      | 1512 | N/A        | 1.130           |         |

#### Asymmetric sample (95 : 5 e.r.)

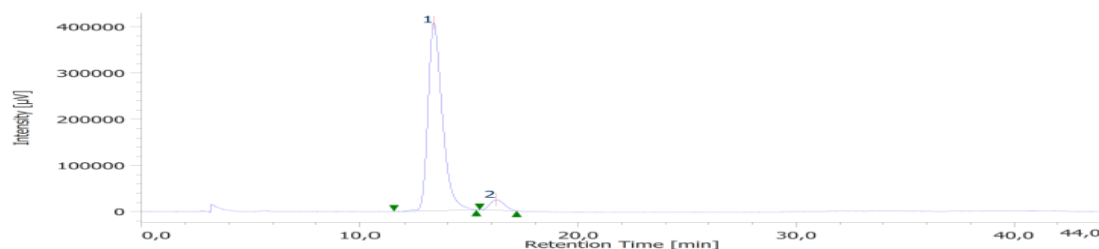

Channel Name 210,0nm Sampling Interval 200 [msec]

| # | Peak Name | CH | tR [min] | Area [μV·sec] | Height [μV] | Area%  | Height% | Quantity | NTP  | Resolution | Symmetry Factor | Warning |
|---|-----------|----|----------|---------------|-------------|--------|---------|----------|------|------------|-----------------|---------|
| 1 | Unknown   | 5  | 13.347   | 18751014      | 406458      | 94.741 | 94.670  | N/A      | 2063 | 2.378      | 1.411           |         |
| 2 | Unknown   | 5  | 16.220   | 1040795       | 22882       | 5.259  | 5.330   | N/A      | 2705 | N/A        | 1.149           |         |

# 6-chloro-1-(4-chlorophenyl)-4-cyclohexylidene-2-((trifluoromethyl)sulfonyl)-1,2,3,4-tetrahydroisoquinoline

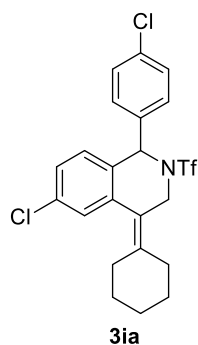

Method A: (75.9 mg, 93% yield), obtained as a white solid. Mp: 47-49 °C. **<sup>1</sup>H NMR** (300 MHz, CDCl<sub>3</sub>) δ 7.27 – 6.97 (m, 7H), 5.86 (s, 1H), 4.36 (d, *J* = 13.5 Hz, 1H), 4.07 (d, *J* = 13.8 Hz, 1H), 2.39 – 2.22 (m, 1H), 2.22 – 2.03 (m, 2H), 2.03 – 1.84 (m, 1H), 1.56 – 1.30 (m, 4H), 1.08 – 0.84 (m, 2H). **<sup>19</sup>F NMR** (282 MHz, CDCl<sub>3</sub>) δ -75.38. **<sup>13</sup>C NMR** (75 MHz, CDCl<sub>3</sub>) δ 142.7 (C), 136.8 (C), 135.2 (C), 134.1 (C), 134.0 (C), 129.8 (CH), 128.70 (CH), 128.65 (CH), 128.5 (CH), 127.4 (CH), 120.0 (q, *J* = 324.0 Hz, C), 118.7 (C), 77.4 (CH), 61.2 (CH<sub>2</sub>), 46.1 (CH<sub>2</sub>), 31.9 (CH<sub>2</sub>), 30.7 (CH<sub>2</sub>), 27.9 (CH<sub>2</sub>), 27.3 (CH<sub>2</sub>), 26.2 (CH<sub>2</sub>). **HRMS** [ESI]: *m/z* calculated for C<sub>22</sub>H<sub>21</sub>Cl<sub>2</sub>F<sub>3</sub>NO<sub>2</sub>S [M+H]<sup>+</sup>: 490.0617, found 490.0616.

Enantioselectivity was determined by chiral SFC analysis on Phenomenex *i*-Cellulose-5 at 40 °C (CO<sub>2</sub> : MeOH = 97:03, 0.5 mL/min).

Racemic sample

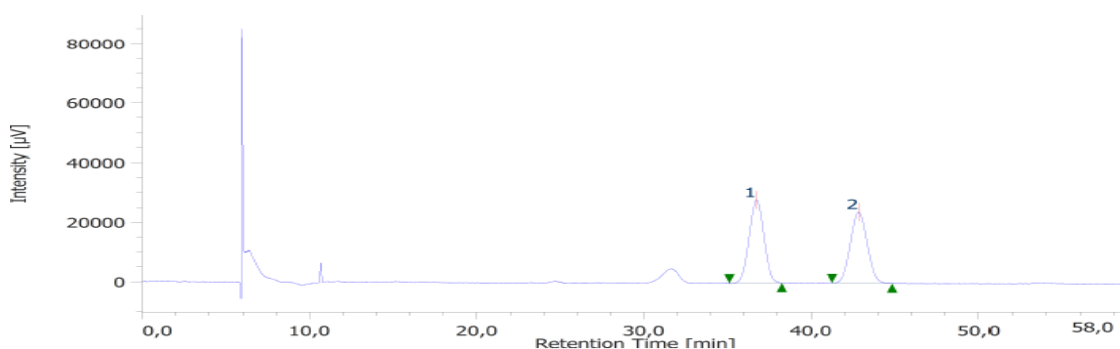

Channel Name 254,0nm Sampling Interval 200 [msec]

| # | Peak Name | CH | tR [min] | Area [μV·sec] | Height [μV] | Area%  | Height% | Quantity | NTP  | Resolution | Symmetry Factor | Warning |
|---|-----------|----|----------|---------------|-------------|--------|---------|----------|------|------------|-----------------|---------|
| 1 | Unknown   | 11 | 36.737   | 1718634       | 27961       | 50.611 | 53.843  | N/A      | 7956 | 3.486      | 1.000           |         |
| 2 | Unknown   | 11 | 42.853   | 1677171       | 23970       | 49.389 | 46.157  | N/A      | 8392 | N/A        | 1.024           |         |

Asymmetric sample (91 : 9 e.r.)

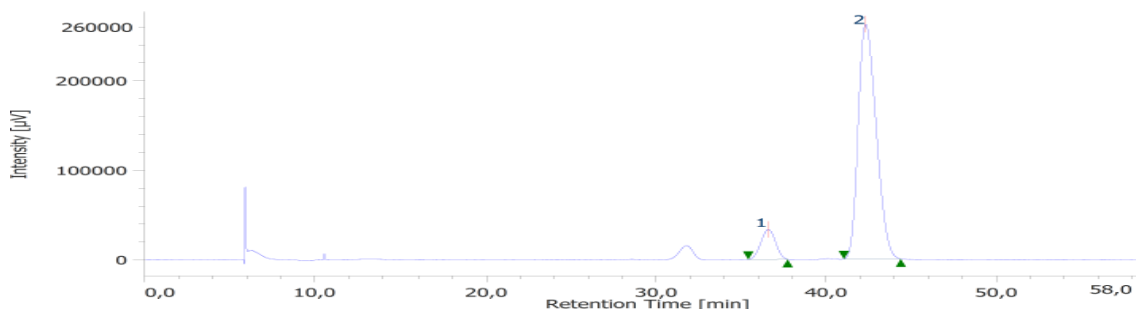

Channel Name 254,0nm Sampling Interval 200 [msec]

| # | Peak Name | CH | tR [min] | Area [μV·sec] | Height [μV] | Area%  | Height% | Quantity | NTP  | Resolution | Symmetry Factor | Warning |
|---|-----------|----|----------|---------------|-------------|--------|---------|----------|------|------------|-----------------|---------|
| 1 | Unknown   | 11 | 36.557   | 2014371       | 33391       | 9.462  | 11.308  | N/A      | 7997 | 3.192      | 1.018           |         |
| 2 | Unknown   | 11 | 42.313   | 19274230      | 261900      | 90.538 | 88.692  | N/A      | 7299 | N/A        | 1.258           |         |

**6-chloro-1-(4-chlorophenyl)-4-(nonan-5-ylidene)-2-((trifluoromethyl)sulfonyl)-1,2,3,4-tetrahydroisoquinoline (3ib)**

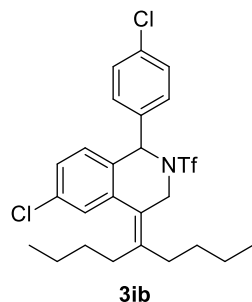

Method A: (76.8 mg, 86% yield), obtained as a transparent oil. **<sup>1</sup>H NMR** (300 MHz, CDCl<sub>3</sub>) δ 7.29 – 7.10 (m, 5H), 7.01 – 6.94 (m, 2H), 5.84 (s, 1H), 4.26 (d, *J* = 14.0 Hz, 1H), 4.08 (d, *J* = 14.0 Hz, 1H), 2.17 – 2.00 (m, 1H), 1.93 – 1.78 (m, 3H), 1.26 – 0.87 (m, 8H), 0.86 – 0.69 (m, 6H). **<sup>19</sup>F NMR** (282 MHz, CDCl<sub>3</sub>) δ -75.39. **<sup>13</sup>C NMR** (75 MHz, CDCl<sub>3</sub>) δ 143.9 (C), 136.9 (C), 136.4 (C), 134.8 (C), 134.2 (C), 134.1 (C), 129.3 (CH), 128.7 (CH), 128.7 (CH), 128.4 (CH), 127.4 (CH), 121.4 (C), 120.1 (d, *J* = 324.4 Hz, C), 61.2 (CH), 46.3 (CH<sub>2</sub>), 32.9 (CH<sub>2</sub>), 31.4 (CH<sub>2</sub>), 30.1 (CH<sub>2</sub>), 29.8 (CH<sub>2</sub>), 22.95 (CH<sub>2</sub>), 22.92 (CH<sub>2</sub>), 14.1 (CH<sub>3</sub>), 14.0 (CH<sub>3</sub>). **HRMS [ESI]:**

*m/z* calculated for C<sub>25</sub>H<sub>29</sub>Cl<sub>2</sub>F<sub>3</sub>NO<sub>2</sub>S [M+H]<sup>+</sup>: 534.1243, found 534.1237.

Enantioselectivity was determined by chiral SFC analysis on Phenomenex *i*-Cellulose-5 at 40 °C (CO<sub>2</sub> : MeOH = 96:04, 0.5 mL/min).

Racemic sample

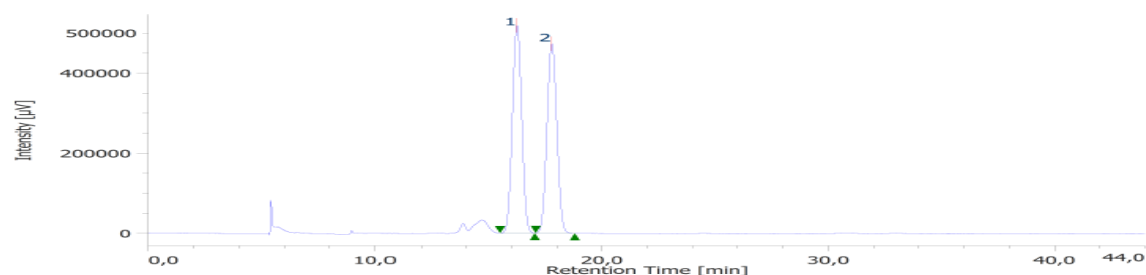

Channel Name 220.0nm Sampling Interval 200 [msec]

| # | Peak Name | CH | tR [min] | Area [μV·sec] | Height [μV] | Area%  | Height% | Quantity | NTP  | Resolution | Symmetry Factor | Warning |
|---|-----------|----|----------|---------------|-------------|--------|---------|----------|------|------------|-----------------|---------|
| 1 | Unknown   | 5  | 16.227   | 14829939      | 517718      | 50.967 | 52.294  | N/A      | 7113 | 1.955      | 1.014           |         |
| 2 | Unknown   | 5  | 17.767   | 14266975      | 472301      | 49.033 | 47.706  | N/A      | 7697 | N/A        | 1.039           |         |

Asymmetric sample (91 : 9 e.r.)

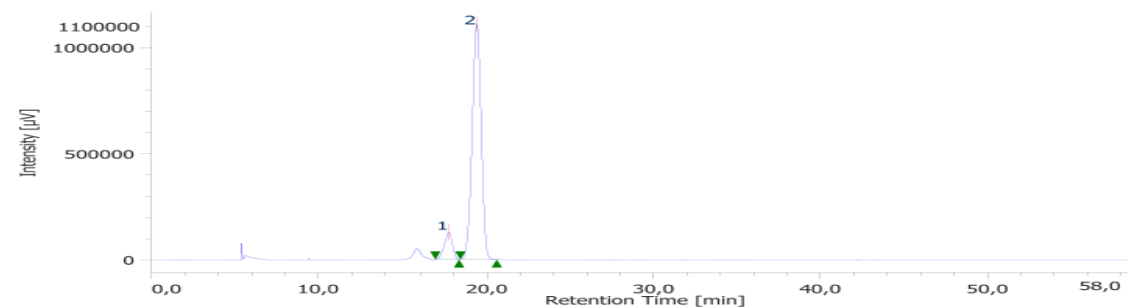

Channel Name 220.0nm Sampling Interval 200 [msec]

| # | Peak Name | CH | tR [min] | Area [μV·sec] | Height [μV] | Area%  | Height% | Quantity | NTP  | Resolution | Symmetry Factor | Warning |
|---|-----------|----|----------|---------------|-------------|--------|---------|----------|------|------------|-----------------|---------|
| 1 | Unknown   | 5  | 17.717   | 4367855       | 127345      | 9.485  | 10.328  | N/A      | 6027 | 1.751      | 0.866           |         |
| 2 | Unknown   | 5  | 19.387   | 41683416      | 1105637     | 90.515 | 89.672  | N/A      | 6021 | N/A        | 0.959           |         |

#### 4-cyclohexylidene-6-methoxy-1-(4-methoxyphenyl)-2-((trifluoromethyl)sulfonyl)-1,2,3,4-tetrahydroisoquinoline (3ja)

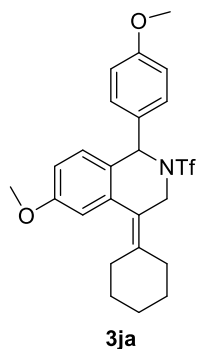

Method A: (74.8 mg, 93% yield), obtained as a yellow oil. <sup>1</sup>H NMR (300 MHz, CDCl<sub>3</sub>) δ 7.13 – 7.06 (m, 1H), 7.03 – 6.98 (m, 2H), 6.78 – 6.68 (m, 4H), 5.85 (s, 1H), 4.30 (d, *J* = 13.7 Hz, 1H), 4.10 (d, *J* = 13.8 Hz, 1H), 3.76 (s, 3H), 3.69 (s, 3H), 2.53 – 1.78 (m, 4H), 1.56 – 1.31 (m, 4H), 1.13 – 0.95 (m, 2H). <sup>19</sup>F NMR (282 MHz, CDCl<sub>3</sub>) δ -75.59. <sup>13</sup>C NMR (75 MHz, CDCl<sub>3</sub>) δ 159.2 (C), 158.9 (C), 140.8 (C), 136.2 (C), 131.0 (C), 129.8 (C), 128.8 (CH), 128.2 (CH), 120.1 (d, *J* = 324.0 Hz, C), 120.0 (C), 115.6 (CH), 113.7 (CH), 112.1 (CH), 61.5 (CH), 55.5 (CH<sub>3</sub>), 55.4 (CH<sub>3</sub>), 46.0 (CH<sub>2</sub>), 32.0 (CH<sub>2</sub>), 30.8 (CH<sub>2</sub>), 27.9 (CH<sub>2</sub>), 27.4 (CH<sub>2</sub>), 26.4 (CH<sub>2</sub>). HRMS [ESI]: *m/z* calculated for C<sub>24</sub>H<sub>27</sub>F<sub>3</sub>NO<sub>4</sub>S [M+H]<sup>+</sup>: 482.1607, found 482.1612.

Enantioselectivity was determined by chiral SFC analysis on Phenomenex Cellulose-1 at 40 °C (CO<sub>2</sub> : MeOH = 95:05, 1 mL/min).

Racemic sample

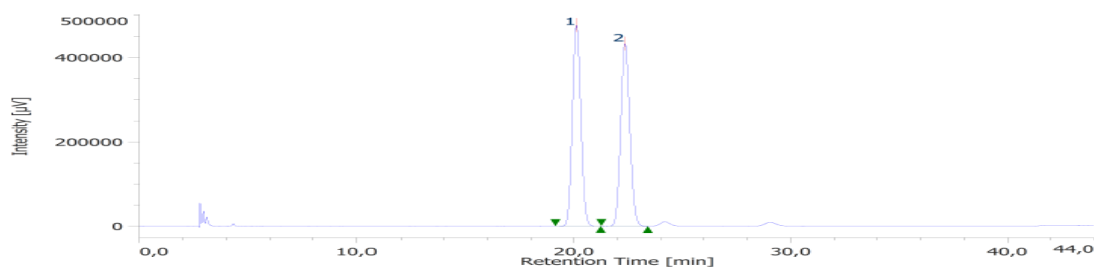

Channel Name 222.0nm Sampling Interval 200 [msec]

| # | Peak Name | CH | tR [min] | Area [μV·sec] | Height [μV] | Area%  | Height% | Quantity | NTP   | Resolution | Symmetry Factor | Warning |
|---|-----------|----|----------|---------------|-------------|--------|---------|----------|-------|------------|-----------------|---------|
| 1 | Unknown   | 10 | 20.093   | 12979419      | 476051      | 50.142 | 52.401  | N/A      | 12311 | 2.976      | 1.087           |         |
| 2 | Unknown   | 10 | 22.343   | 12905703      | 432425      | 49.858 | 47.599  | N/A      | 12735 | N/A        | 1.088           |         |

Asymmetric sample (94 : 6 e.r.)

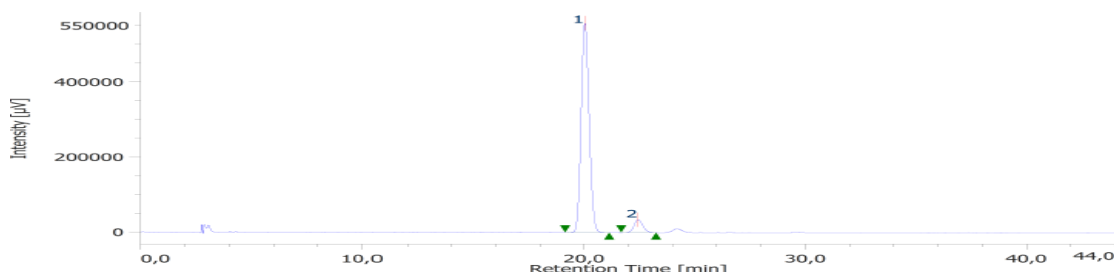

Channel Name 222.0nm Sampling Interval 200 [msec]

| # | Peak Name | CH | tR [min] | Area [μV·sec] | Height [μV] | Area%  | Height% | Quantity | NTP   | Resolution | Symmetry Factor | Warning |
|---|-----------|----|----------|---------------|-------------|--------|---------|----------|-------|------------|-----------------|---------|
| 1 | Unknown   | 10 | 20.017   | 13956839      | 557304      | 93.685 | 94.256  | N/A      | 14680 | 3.483      | 1.127           |         |
| 2 | Unknown   | 10 | 22.437   | 940851        | 33965       | 6.315  | 5.744   | N/A      | 15014 | N/A        | 1.098           |         |



#### 4-cyclohexylidene-7-methoxy-1-(3-methoxyphenyl)-2-((trifluoromethyl)sulfonyl)-1,2,3,4-tetrahydroisoquinoline (3ka)

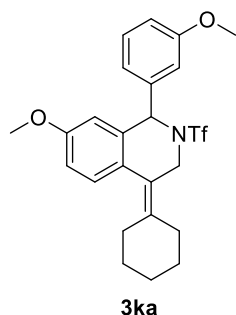

Method A: (72.4 mg, 90% yield), obtained as a white solid. Mp: 125-127 °C. <sup>1</sup>H NMR (500 MHz, CDCl<sub>3</sub>) δ 7.13 (d, *J* = 8.4 Hz, 1H), 7.11 – 7.08 (m, 1H), 6.82 (dd, *J* = 8.4, 2.7 Hz, 1H), 6.75 (d, *J* = 2.7 Hz, 1H), 6.72 – 6.70 (m, 1H), 6.70 – 6.68 (m, 1H), 6.68 – 6.65 (m, 1H), 5.83 (s, 1H), 4.34 (d, *J* = 13.6 Hz, 1H), 4.11 (d, *J* = 12.7 Hz, 1H), 3.75 (s, 3H), 3.66 (s, 3H), 2.43 – 2.22 (m, 1H), 2.18 – 2.01 (m, 2H), 2.01 – 1.77 (m, 1H), 1.52 – 1.28 (m, 4H), 1.05 – 0.85 (m, 2H). <sup>19</sup>F NMR (470 MHz, CDCl<sub>3</sub>) δ -75.58. <sup>13</sup>C NMR (76 MHz, CDCl<sub>3</sub>) δ 159.8 (C), 158.6 (C), 139.9 (C), 139.4 (C), 138.3 (C), 131.0 (CH), 129.5 (CH), 127.4 (C), 120.1 (d, *J* = 323.9 Hz, C), 119.9 (CH), 119.2 (C), 113.7 (CH), 113.4 (CH), 112.8 (CH), 112.6 (CH), 62.3 (CH), 55.5 (CH<sub>3</sub>), 55.4 (CH<sub>3</sub>), 46.6 (CH<sub>2</sub>), 32.0 (CH<sub>2</sub>), 30.6 (CH<sub>2</sub>), 27.8 (CH<sub>2</sub>), 27.3 (CH<sub>2</sub>), 26.5 (CH<sub>2</sub>). **HRMS** [ESI]: *m/z* calculated for C<sub>24</sub>H<sub>27</sub>F<sub>3</sub>NO<sub>4</sub>S [M+H]<sup>+</sup>: 482.1607, found 482.1619.

Enantioselectivity was determined by chiral SFC analysis on Phenomenex Amylose-2 at 40 °C (CO<sub>2</sub> : MeOH = 96:04, 0.5 mL/min).

Racemic sample

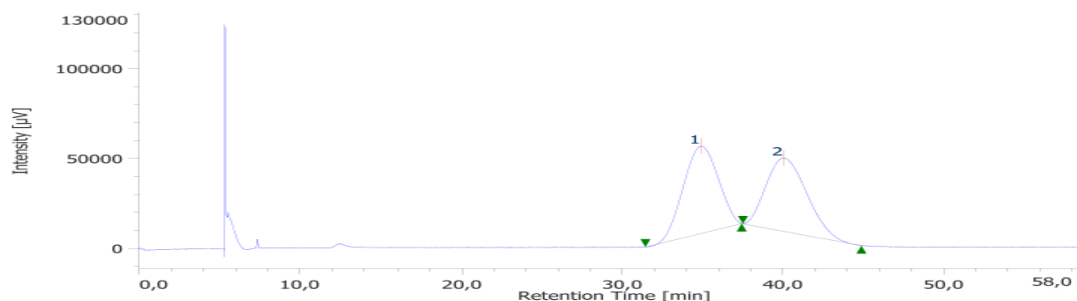

Channel Name 254.0nm Sampling Interval 200 [msec]

| # | Peak Name | CH | tR [min] | Area [μV·sec] | Height [μV] | Area%  | Height% | Quantity | NTP  | Resolution | Symmetry Factor | Warning |
|---|-----------|----|----------|---------------|-------------|--------|---------|----------|------|------------|-----------------|---------|
| 1 | Unknown   | 5  | 34.880   | 7340802       | 48615       | 50.471 | 54.400  | N/A      | 1114 | 1.148      | 0.986           |         |
| 2 | Unknown   | 5  | 40.047   | 7203868       | 40750       | 49.529 | 45.600  | N/A      | 1094 | N/A        | 1.233           |         |

Asymmetric sample (90 :10 e.r.)

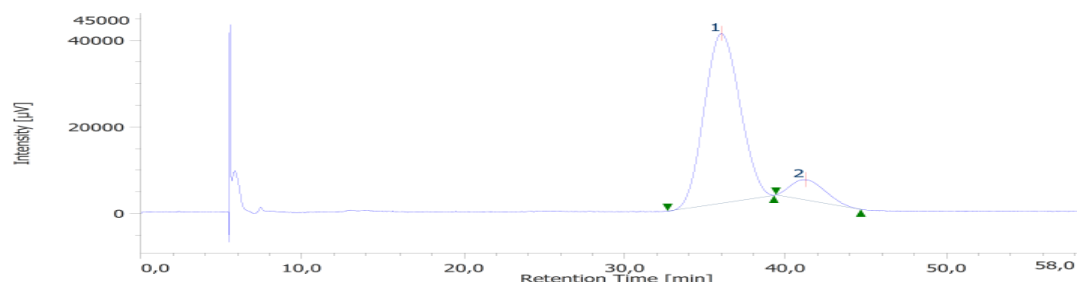

Channel Name 254.0nm Sampling Interval 200 [msec]

| # | Peak Name | CH | tR [min] | Area [μV·sec] | Height [μV] | Area%  | Height% | Quantity | NTP  | Resolution | Symmetry Factor | Warning |
|---|-----------|----|----------|---------------|-------------|--------|---------|----------|------|------------|-----------------|---------|
| 1 | Unknown   | 5  | 36.020   | 6055247       | 39232       | 89.702 | 89.352  | N/A      | 1185 | 1.251      | 1.061           |         |
| 2 | Unknown   | 5  | 41.210   | 695179        | 4675        | 10.298 | 10.648  | N/A      | 1589 | N/A        | 1.321           |         |

## Procedure for the kinetic resolution of benzylamides with allenes

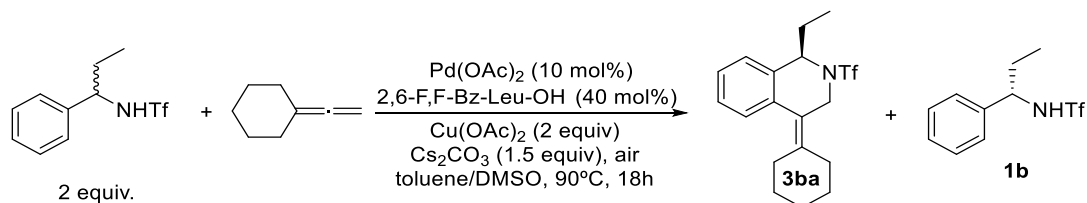

To a solution of  $\text{Pd}(\text{OAc})_2$  (3.7 mg, 10 mol%), 2,6-F,F-Bz-Leu-OH (18.1 mg, 40 mol%),  $\text{Cu}(\text{OAc})_2 \cdot \text{H}_2\text{O}$  (66.7 mg, 2 equiv.),  $\text{Cs}_2\text{CO}_3$  (81.6 mg, 1.5 equiv.) and **1b** (89.3 mg, 0.333 mmol, 2 equiv.) in toluene (2 mL) under air atmosphere in a Schlenk tube was added the allene **2a** (18.0 mg, 0.167 mmol). The tube was sealed with a rubber septum and an air atmosphere was injected in the flask with a balloon and a needle. The reaction was heated at 90 °C, stirred during 22 h and then cooled to room temperature. Evaporation and column chromatography on silica gel (hexanes:diethylether; 99:1) afforded **4-cyclohexylidene-1-ethyl-2-((trifluoromethyl)sulfonyl)-1,2,3,4-tetrahydroisoquinoline (3ba)** as a white solid (56.6 mg, 91% yield, Mp: 88-90 °C) and remaining **1b** as a white solid (39.0 mg, 40% yield based on the starting benzylamide, 80% recovered based on reaction yield). **<sup>1</sup>H NMR** (300 MHz,  $\text{CDCl}_3$ )  $\delta$  7.28 – 7.10 (m, 3H), 7.03 (d,  $J$  = 7.3 Hz, 1H), 4.62 – 4.44 (m, 2H), 4.07 (d,  $J$  = 13.4 Hz, 1H), 2.45 – 2.34 (m, 2H), 2.34 – 2.11 (m, 2H), 1.92 – 1.37 (m, 9H), 0.84 (t,  $J$  = 7.4 Hz, 3H). **<sup>19</sup>F NMR** (282 MHz,  $\text{CDCl}_3$ )  $\delta$  -75.54. **<sup>13</sup>C NMR** (75 MHz,  $\text{CDCl}_3$ )  $\delta$  140.5 (C), 137.8 (C), 133.9 (C), 129.5 (CH), 127.4 (CH), 127.0 (CH), 126.6 (CH), 120.2 (d,  $J$  = 324.4 Hz, C), 119.8 (C), 62.3 (CH), 46.3 ( $\text{CH}_2$ ), 32.2 ( $\text{CH}_2$ ), 31.0 ( $\text{CH}_2$ ), 28.5 ( $\text{CH}_2$ ), 28.0 ( $\text{CH}_2$ ), 26.7 ( $\text{CH}_2$ ), 11.2 (CH). **HRMS [ESI]:**  $m/z$  calculated for  $\text{C}_{18}\text{H}_{23}\text{F}_3\text{NO}_2\text{S}$   $[\text{M}+\text{H}]^+$ : 374.1396, found 374.1398. The structure of **3ba** was confirmed by X-Ray diffraction analysis (CCDC: 1880116, hydrogens omitted for clarity).

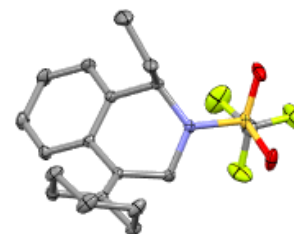

Enantioselectivity was determined by chiral SFC analysis on Chiralpak IF-3 at 40 °C ( $\text{CO}_2$ , 2 mL/min).

Racemic sample

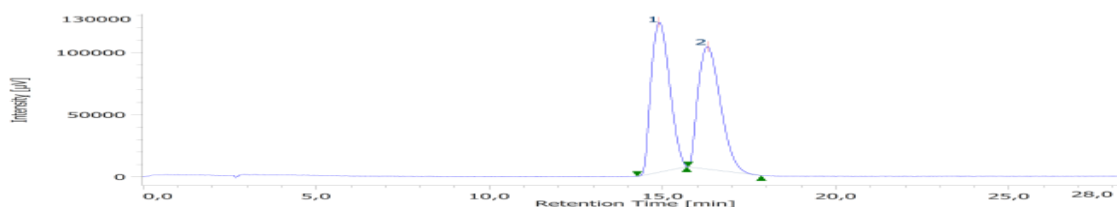

Channel Name 254.0nm Sampling Interval 200 [msec]

| # | Peak Name | CH | tR [min] | Area [μV·sec] | Height [μV] | Area%  | Height% | Quantity | NTP  | Resolution | Symmetry Factor | Warning |
|---|-----------|----|----------|---------------|-------------|--------|---------|----------|------|------------|-----------------|---------|
| 1 | Unknown   | 5  | 14.907   | 4535366       | 120606      | 50.574 | 54.988  | N/A      | 3234 | 1.214      | 1.259           |         |
| 2 | Unknown   | 5  | 16.287   | 4432385       | 98727       | 49.426 | 45.012  | N/A      | 2804 | N/A        | 1.445           |         |

Asymmetric sample (93 :7 e.r.)

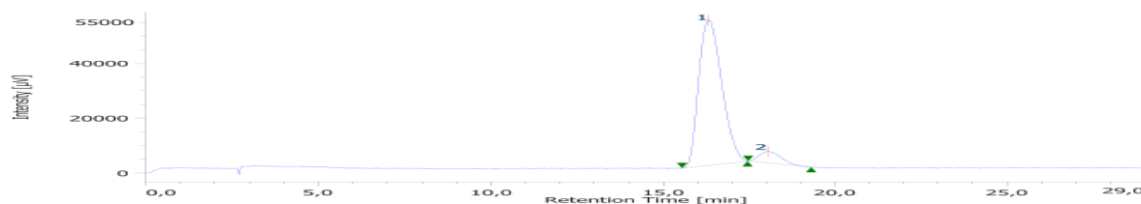

Channel Name 254.0nm Sampling Interval 200 [msec]

| # | Peak Name | CH | tR [min] | Area [μV·sec] | Height [μV] | Area%  | Height% | Quantity | NTP  | Resolution | Symmetry Factor | Warning |
|---|-----------|----|----------|---------------|-------------|--------|---------|----------|------|------------|-----------------|---------|
| 1 | Unknown   | 9  | 16.320   | 2467749       | 52800       | 93.060 | 92.707  | N/A      | 2635 | 1.376      | 1.288           |         |
| 2 | Unknown   | 9  | 18.030   | 184031        | 4154        | 6.940  | 7.293   | N/A      | 3487 | N/A        | 1.353           |         |

## Procedure for the derivatization<sup>9</sup> of recovered triflimide **1b** to measure the enantiomeric ratio

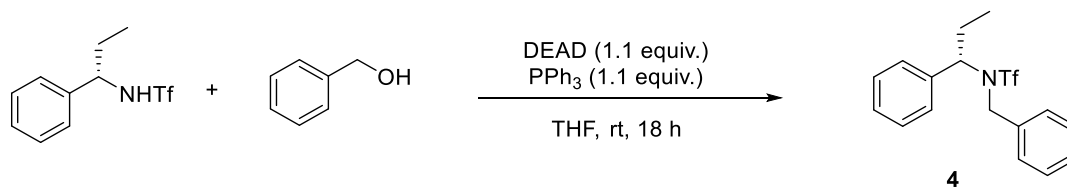

To a solution of recovered **1,1,1-trifluoro-N-(1-phenylpropyl)methanesulfonamide (1b)**, 39.0 mg, 0.146 mmol), benzyl alcohol (15.8 mg, 1 equiv.), and triphenylphosphine (42.1 mg, 1.1 equiv.) in THF (0.15 mL) was added DEAD (63  $\mu$ L, 40% in toluene, 1.1 equiv.). The reaction mixture was stirred at room temperature overnight. Evaporation of the solvent and column chromatography on silica gel (hexanes:diethylether; 90:10) afforded **N-benzyl-1,1,1-trifluoro-N-(1-phenylpropyl)methanesulfonamide (4)** as a transparent oil (22.8 mg, 44%). <sup>1</sup>H NMR (300 MHz, Chloroform-d)  $\delta$  7.36 – 6.99 (m, 10H), 4.87 (t,  $J$  = 7.9 Hz, 1H), 4.46 (d,  $J$  = 16.1 Hz, 1H), 3.92 (brs, 1H), 1.77 (d,  $J$  = 10.4 Hz, 2H), 0.69 (t,  $J$  = 7.3 Hz, 3H). HRMS [ESI]:  $m/z$  calculated for C<sub>17</sub>H<sub>18</sub>F<sub>3</sub>NO<sub>2</sub>S [M+H]<sup>+</sup>: 357.1005, found 357.1001.

Enantioselectivity was determined by chiral SFC analysis on Phenomenex Cellulose-1 at 40 °C (CO<sub>2</sub> : MeOH = 99:01, 0.5 mL/min).

### Racemic sample

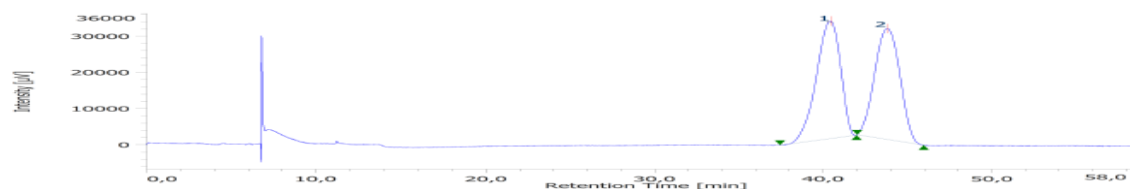

Channel Name 222,0nm Sampling Interval 200 [msec]

| # | Peak Name | CH | tR [min] | Area [μV·sec] | Height [μV] | Area%  | Height% | Quantity | NTP  | Resolution | Symmetry Factor | Warning |
|---|-----------|----|----------|---------------|-------------|--------|---------|----------|------|------------|-----------------|---------|
| 1 | Unknown   | 10 | 40.423   | 32355.16      | 32453       | 50.331 | 51.475  | N/A      | 3633 | 1.208      | 0.818           |         |
| 2 | Unknown   | 10 | 43.773   | 31929.86      | 30593       | 49.669 | 48.525  | N/A      | 3705 | N/A        | 1.010           |         |

### Asymmetric sample (86 :14 e.r.)

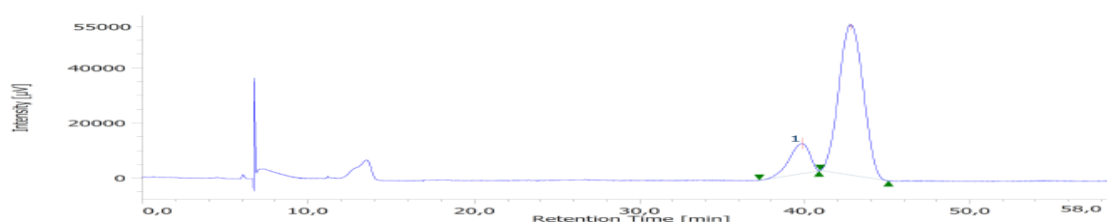

Channel Name 222,0nm Sampling Interval 200 [msec]

| # | Peak Name | CH | tR [min] | Area [μV·sec] | Height [μV] | Area%  | Height% | Quantity | NTP  | Resolution | Symmetry Factor | Warning |
|---|-----------|----|----------|---------------|-------------|--------|---------|----------|------|------------|-----------------|---------|
| 1 | Unknown   | 10 | 39.810   | 9387.42       | 10978       | 14.309 | 16.707  | N/A      | 4680 | 1.175      | 0.767           |         |
| 2 | Unknown   | 10 | 42.817   | 56216.13      | 54731       | 85.691 | 83.293  | N/A      | 3734 | N/A        | 0.998           |         |

<sup>9</sup> Bell, E.; Knight, D. W.; Uk, N. G. Z. R. D.; Gravestock, B. *Org. Lett.* **1995**, 36, 8681–8684.

## Pd-catalyzed annulation of a triflamide **1m** (with two different aryl rings) with allene **2a**

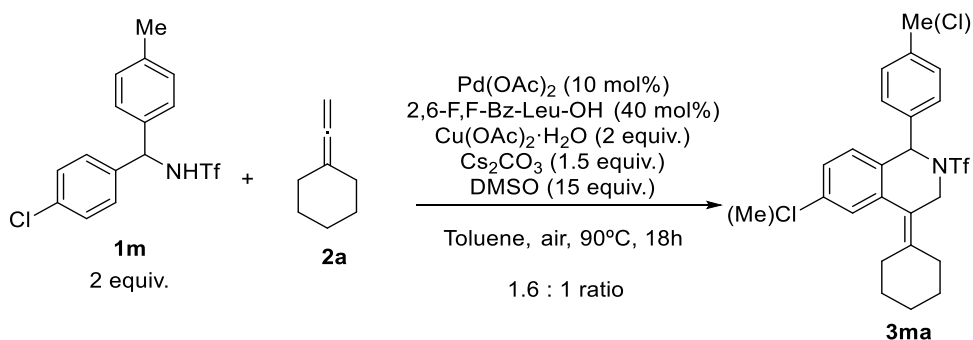

To a solution of  $\text{Pd}(\text{OAc})_2$  (3.7 mg, 10 mol%), 2,6-F,F-Bz-Leu-OH (18.1 mg, 40 mol%),  $\text{Cu}(\text{OAc})_2 \cdot \text{H}_2\text{O}$  (66.7 mg, 2 equiv.),  $\text{Cs}_2\text{CO}_3$  (81.6 mg, 1.5 equiv.) and **1m** (121.5 mg, 0.333 mmol, 2 equiv.) in toluene (2 mL), under air atmosphere, in a Schlenk tube was added the allene **2a** (18.0 mg, 0.167 mmol). The tube was sealed with a rubber septum and an air atmosphere was injected in the flask with a balloon and a needle. The reaction was heated at  $90^\circ\text{C}$ , stirred during 18 h and then cooled to room temperature. Evaporation and column chromatography on silica gel (hexanes:diethylether; 99:1). Obtained as a 1.6:1 inseparable mixture (70.4 mg, 90% yield, white solid).  **$^1\text{H}$  NMR** (300 MHz,  $\text{CDCl}_3$ )  $\delta$  7.31 – 6.87 (m, 7H), 5.88 (s, 0.39H), 5.83 (s, 0.61H), 4.52 – 3.88 (m, 2H), 2.41 – 2.03 (m, 6H), 1.98 – 1.82 (m, 1H), 1.54 – 1.25 (m, 4H), 1.10 – 0.69 (m, 2H).  **$^{19}\text{F}$  NMR** (282 MHz,  $\text{CDCl}_3$ )  $\delta$  -75.42.  **$^{13}\text{C}$  NMR** (75 MHz,  $\text{CDCl}_3$ )  $\delta$  141.0 (C), 140.6 (C), 137.9 (C), 137.8 (C), 137.7 (C), 135.0 (C), 133.8 (C), 133.7 (C), 133.5 (C), 130.4 (CH) 129.8 (C), 129.7 (CH), 129.2 (CH), 129.1 (CH), 128.7 (CH), 128.5 (CH), 128.4 (CH), 128.0 (C), 127.8 (C), 127.6 (C), 127.4 (CH), 127.38 (CH), 127.11 (CH), 127.06 (CH), 118.76 (d,  $J = 125.7$  Hz, C), 61.7 (CH), 61.6 (CH), 46.5 ( $\text{CH}_2$ ), 46.0 ( $\text{CH}_2$ ), 31.94 ( $\text{CH}_2$ ), 31.89 ( $\text{CH}_2$ ), 30.8 ( $\text{CH}_2$ ), 30.6 ( $\text{CH}_2$ ), 27.9 ( $\text{CH}_2$ ), 27.8 ( $\text{CH}_2$ ), 27.4 ( $\text{CH}_2$ ), 27.2 ( $\text{CH}_2$ ), 26.4 ( $\text{CH}_2$ ), 26.3 ( $\text{CH}_2$ ), 21.6 ( $\text{CH}_3$ ), 21.1 ( $\text{CH}_3$ ).

# NMR SPECTRA

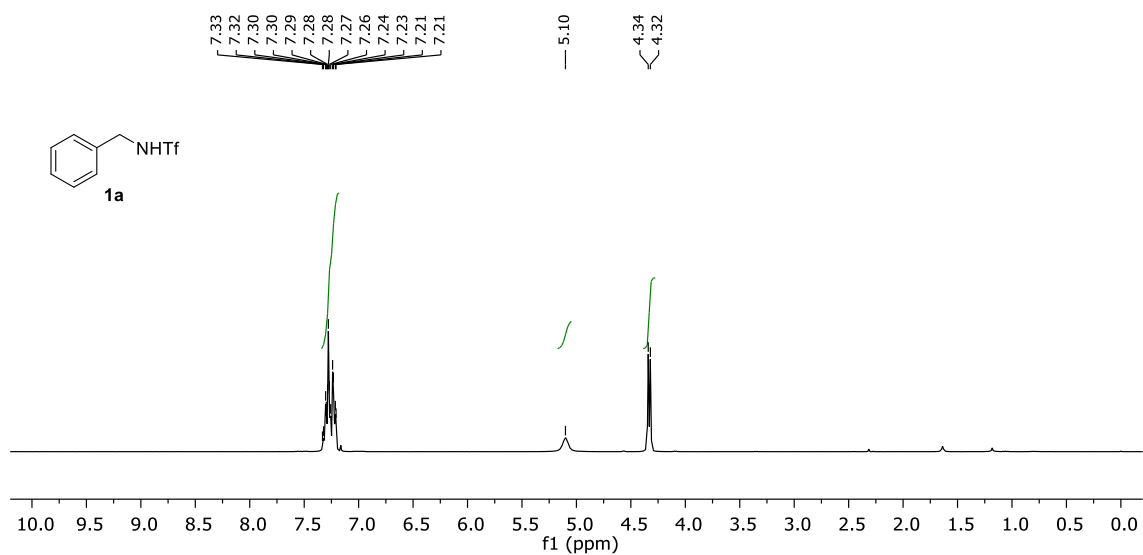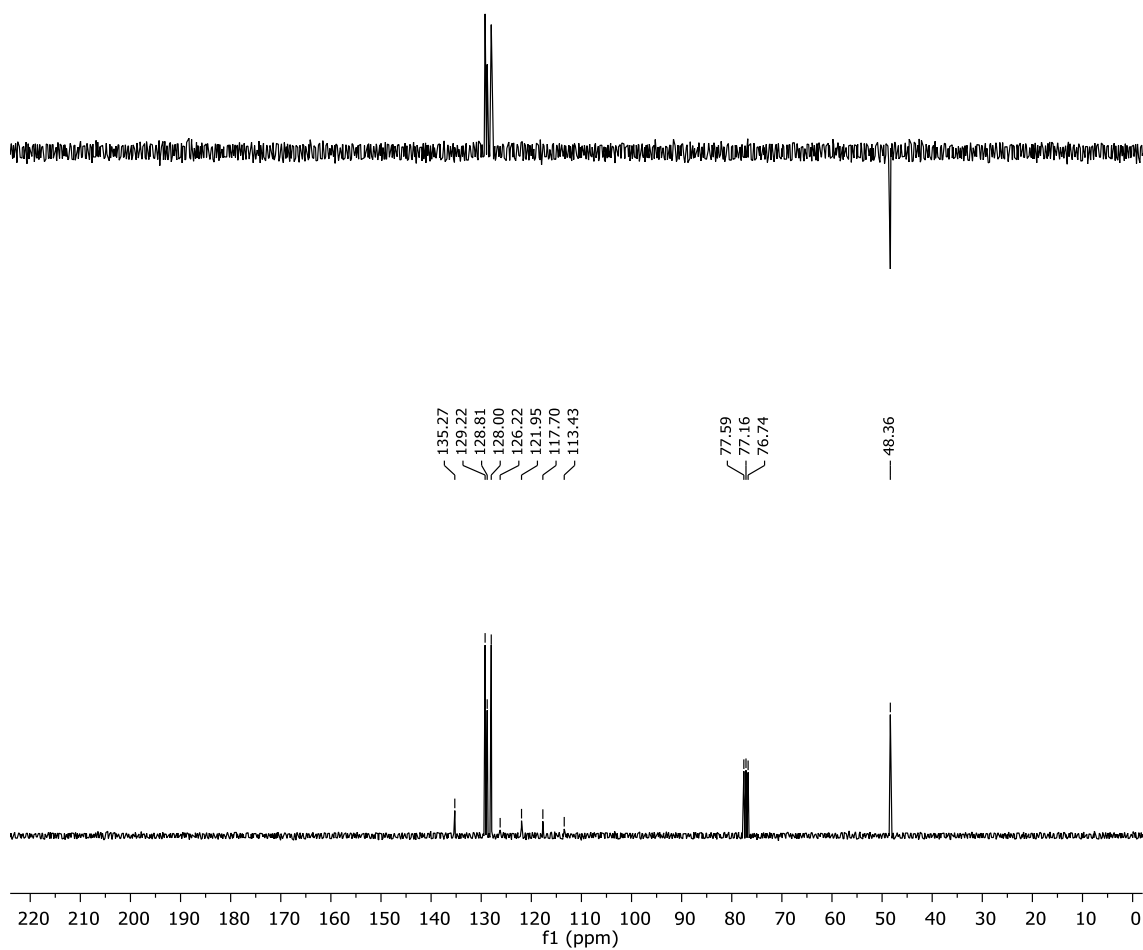

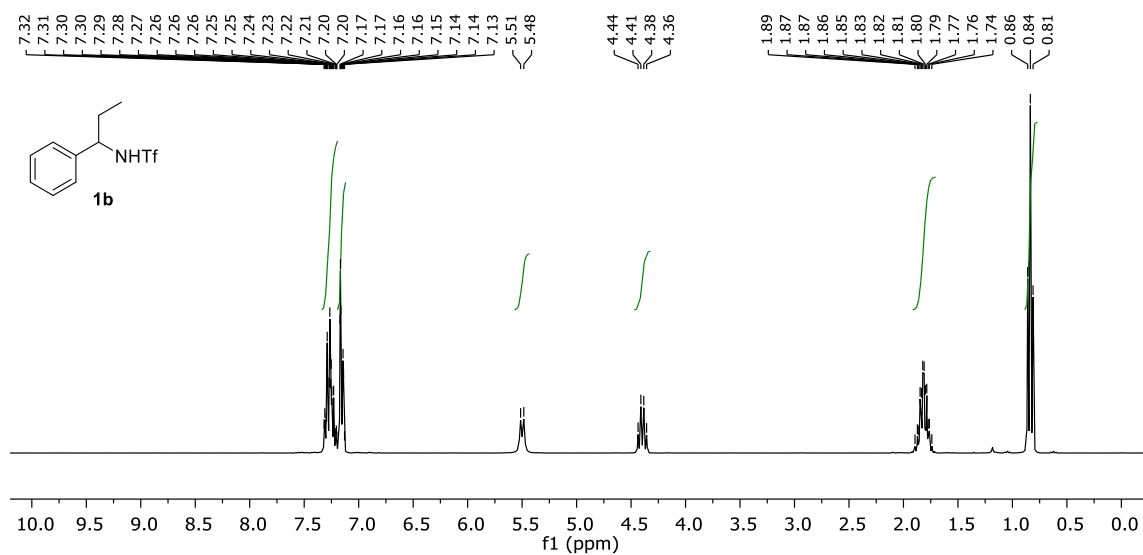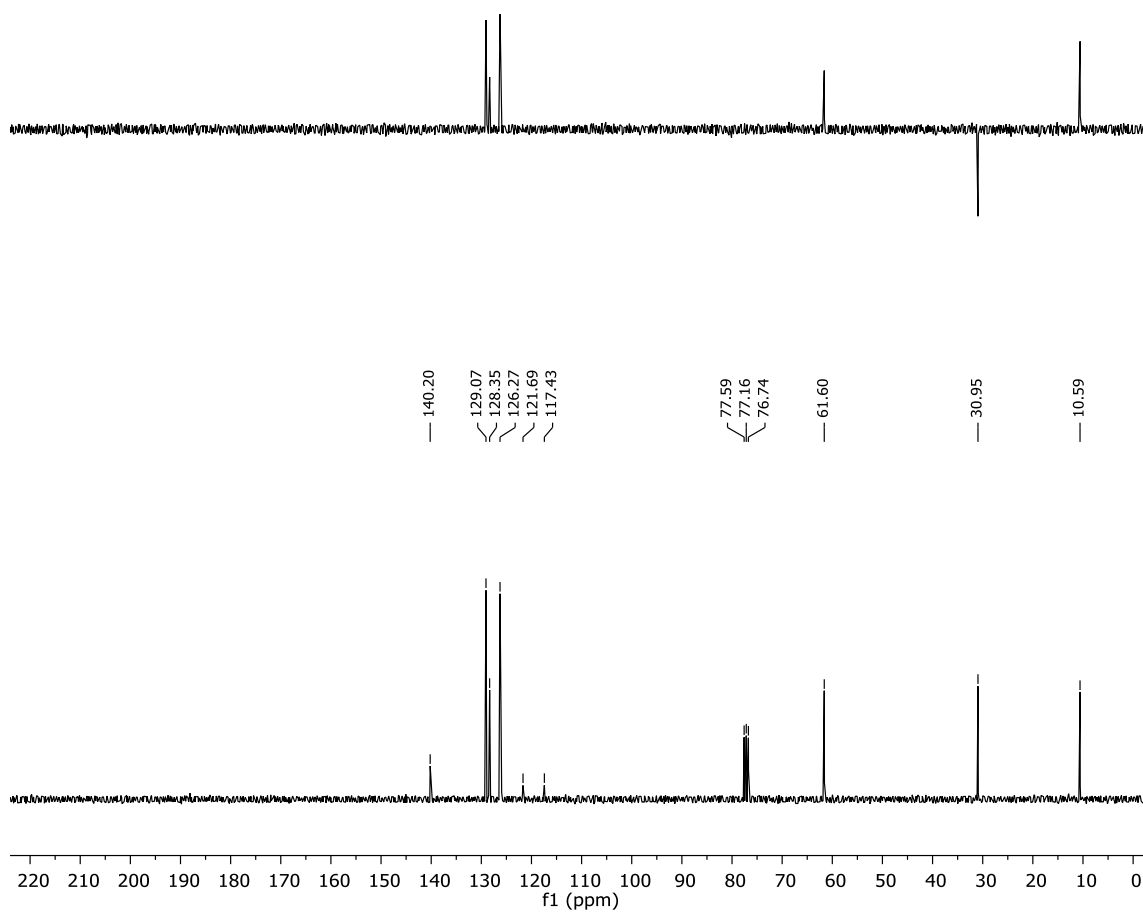

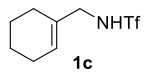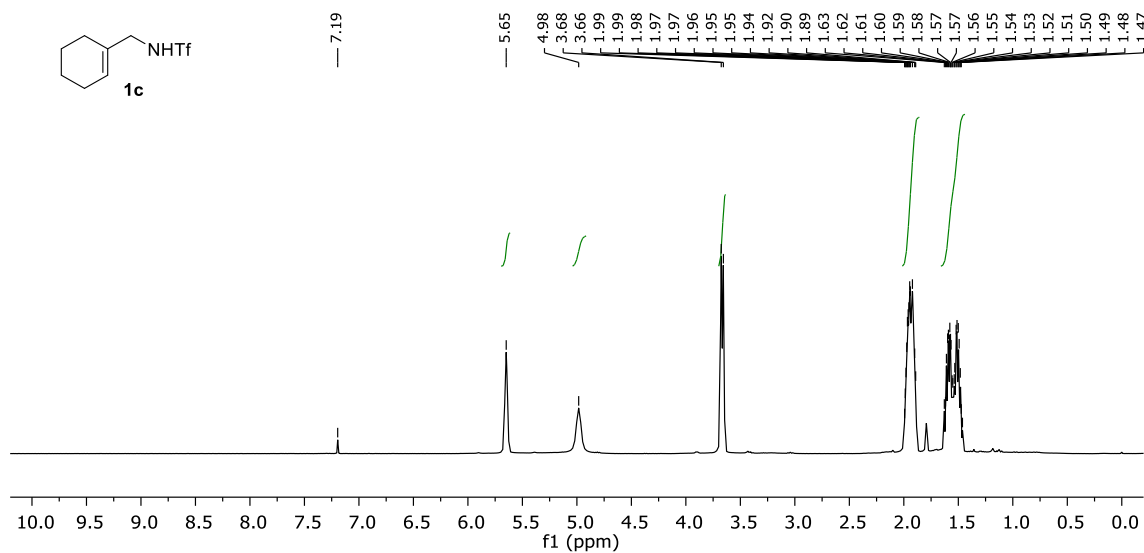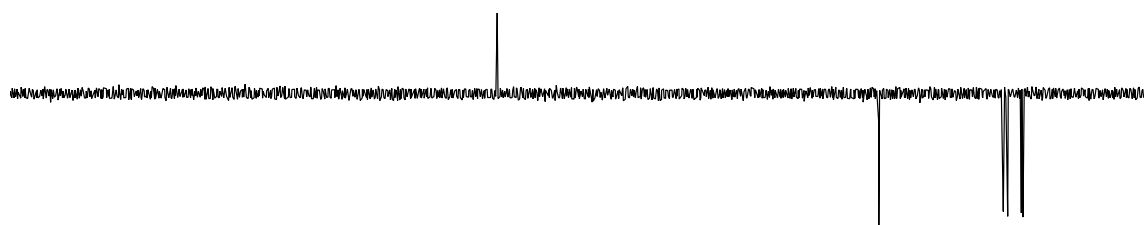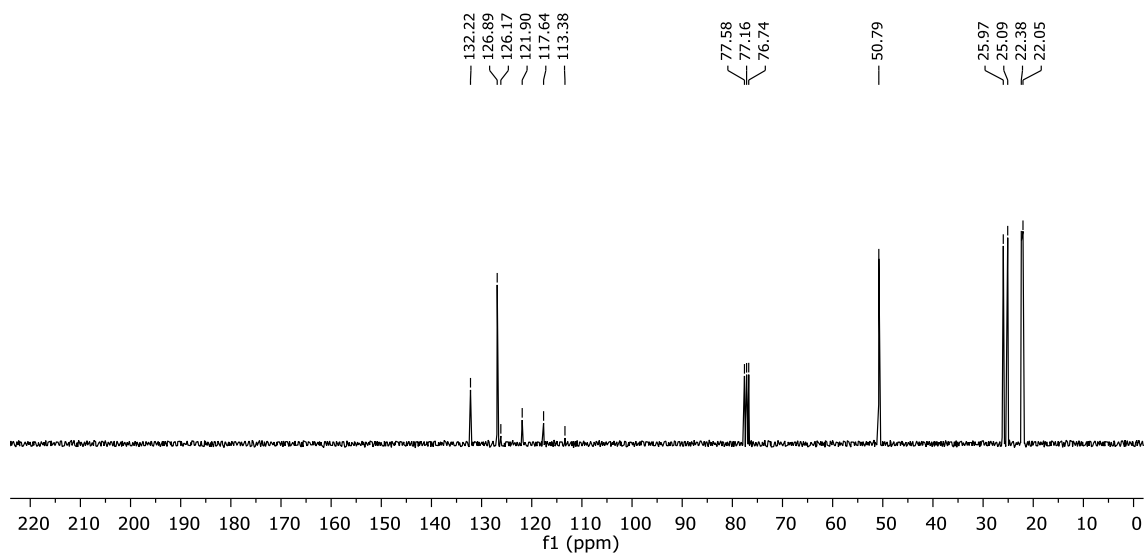



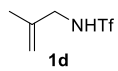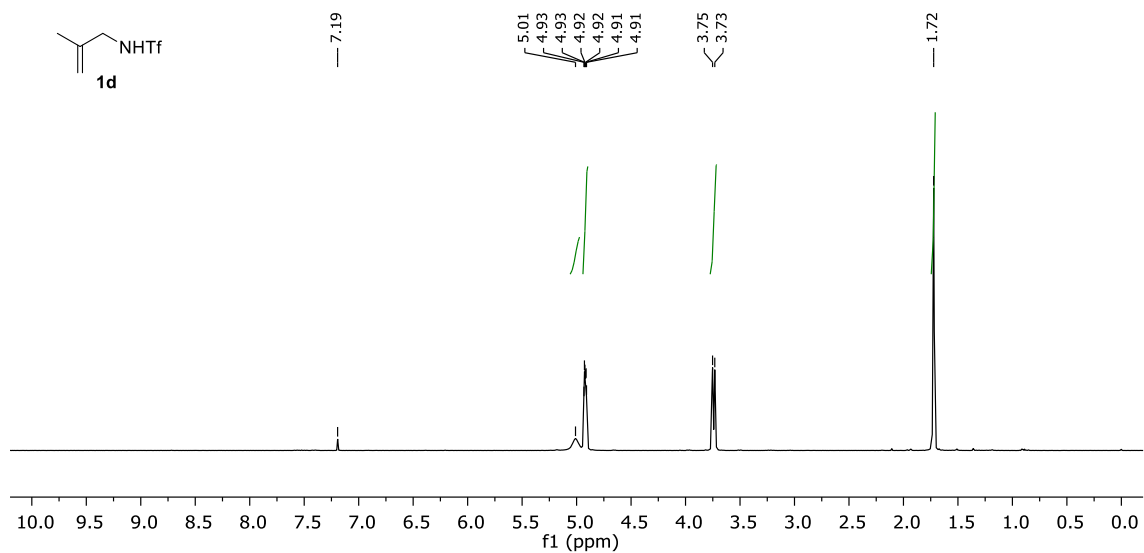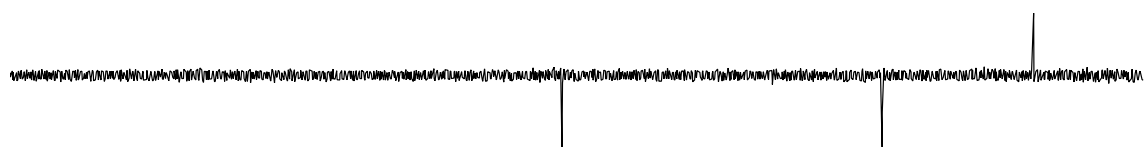

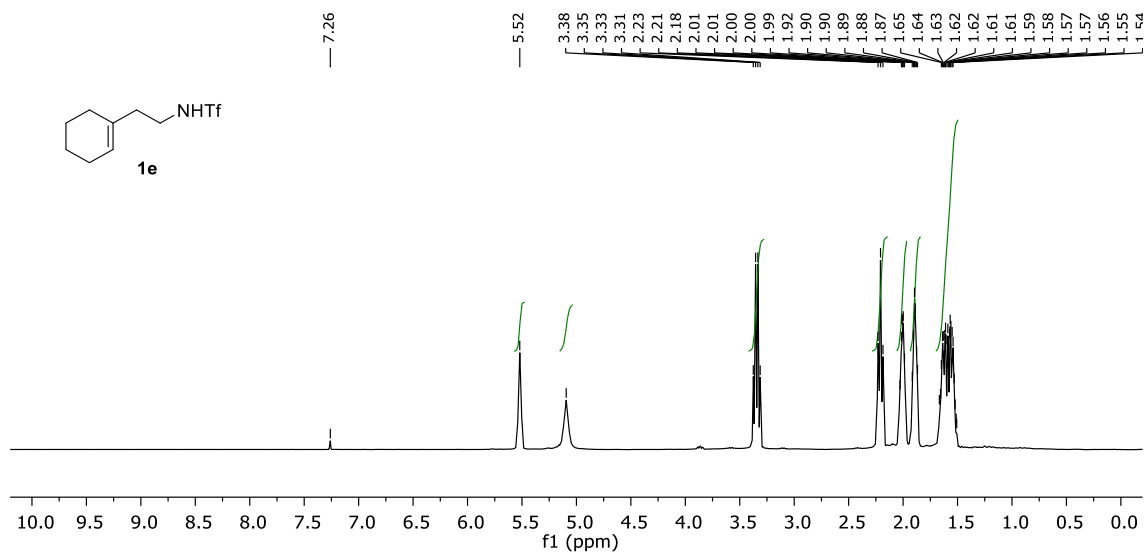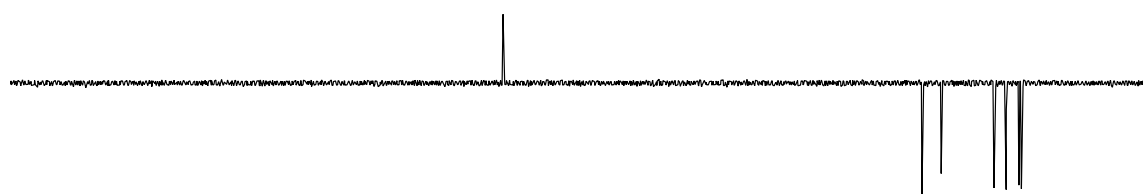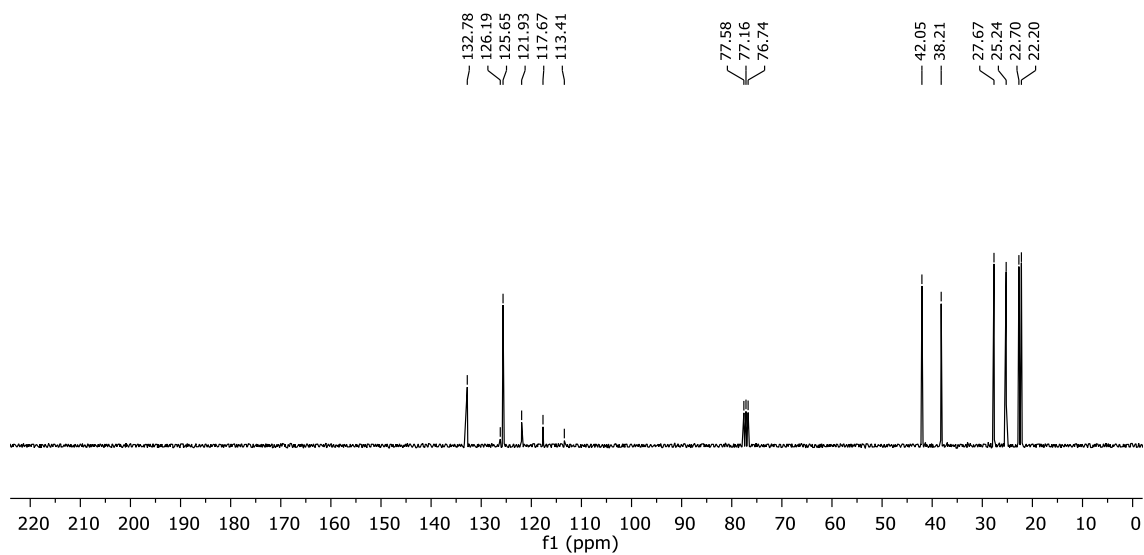

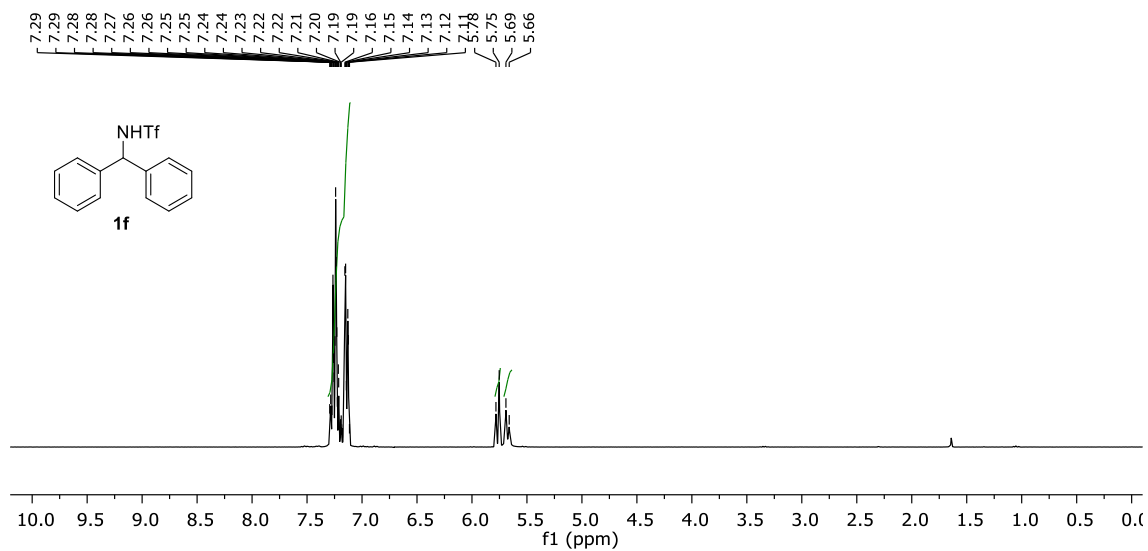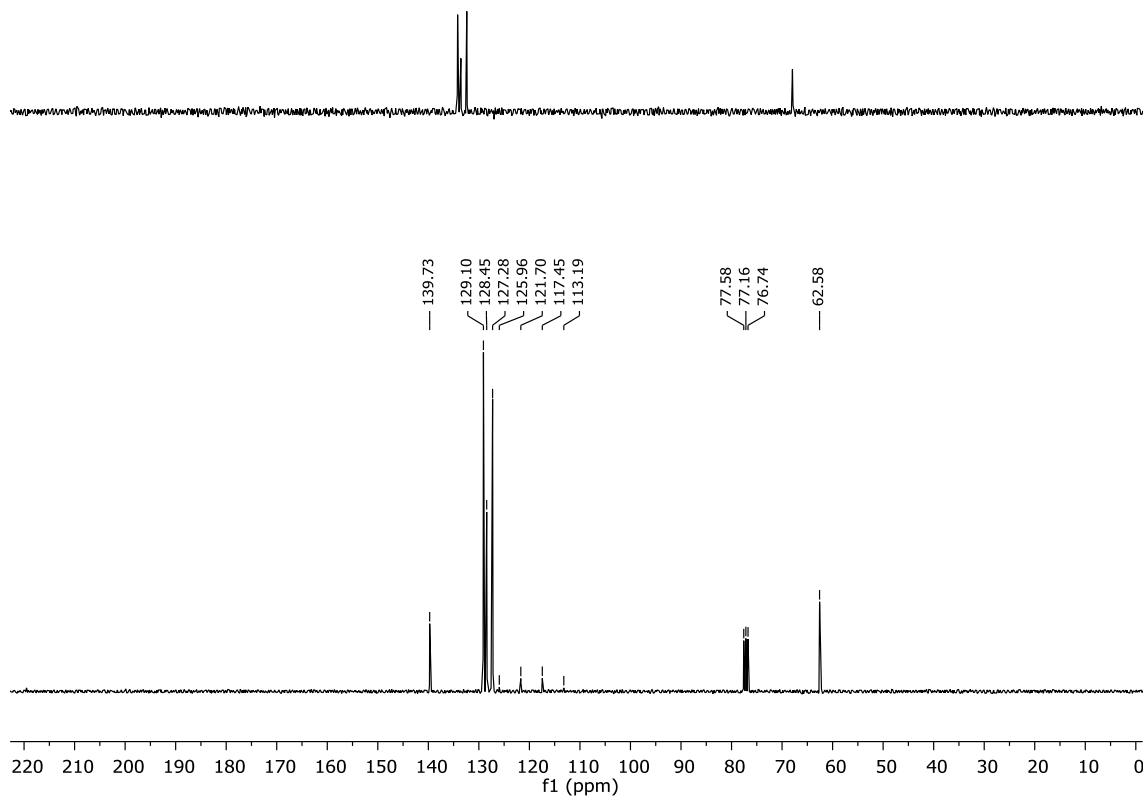

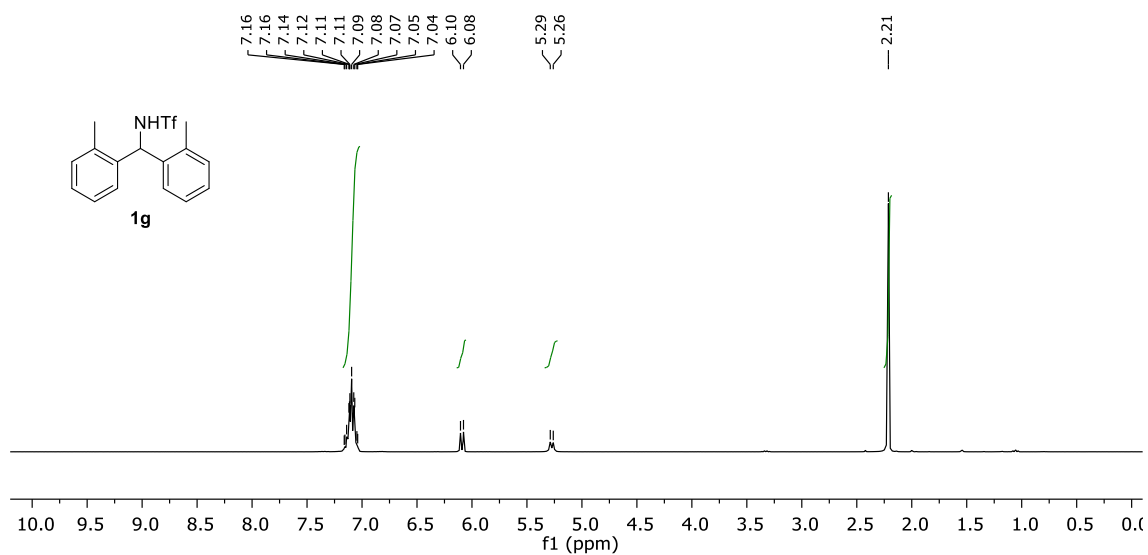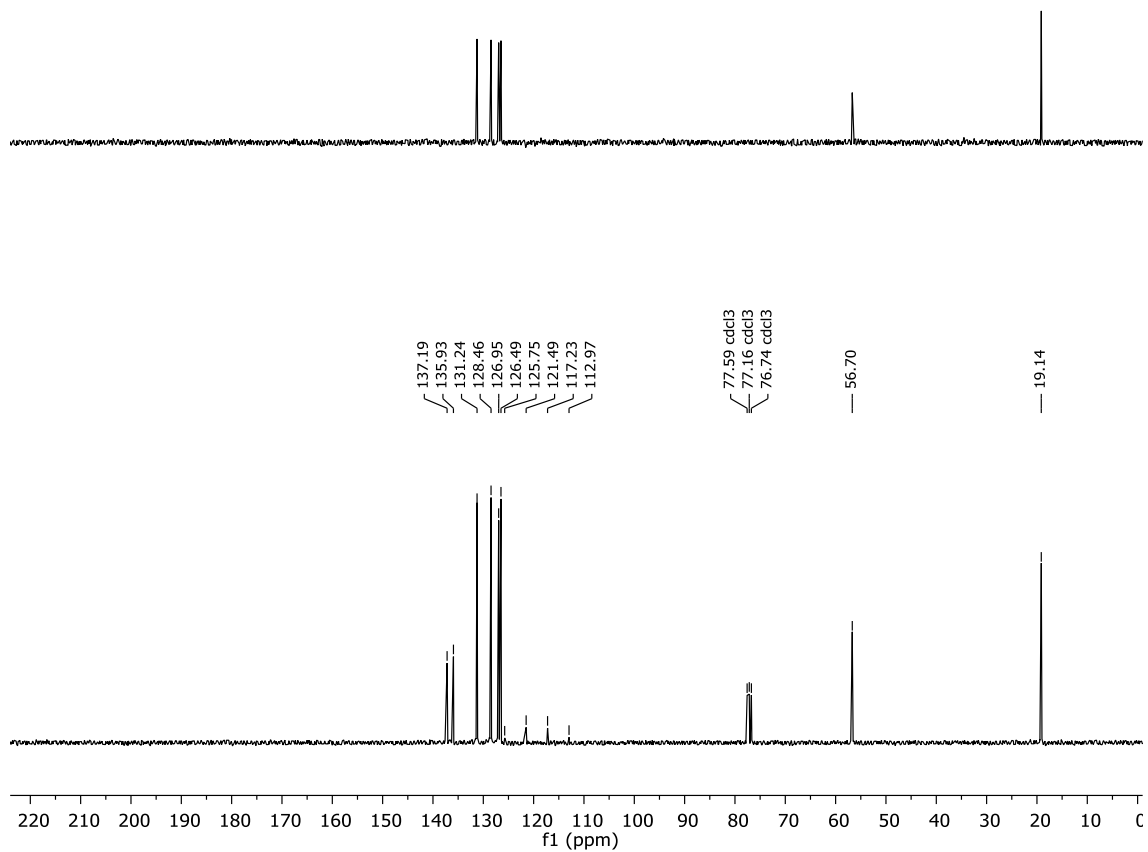

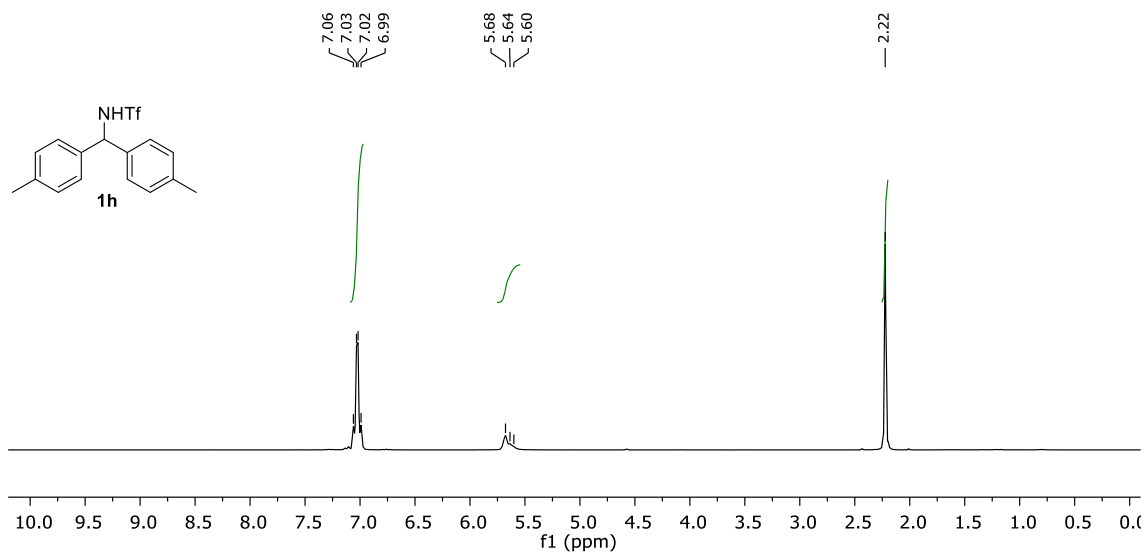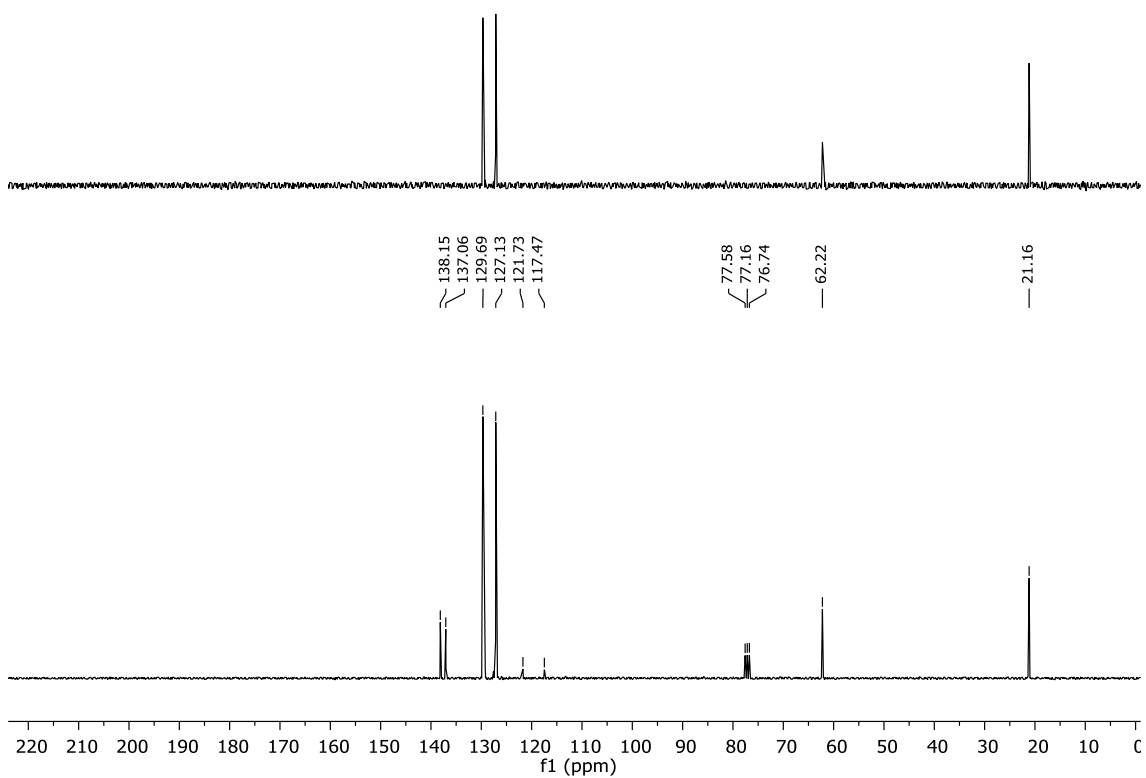

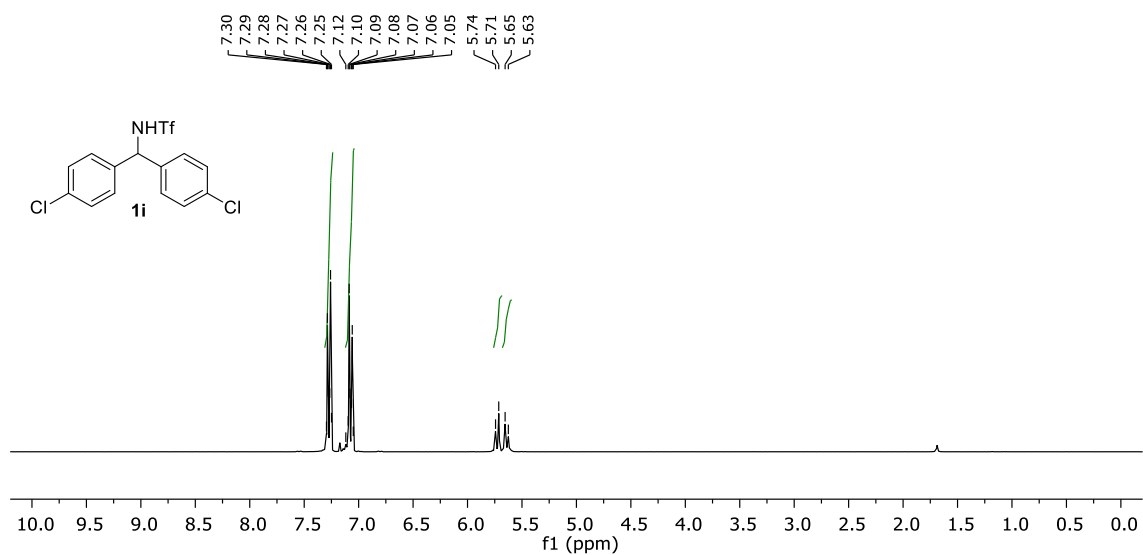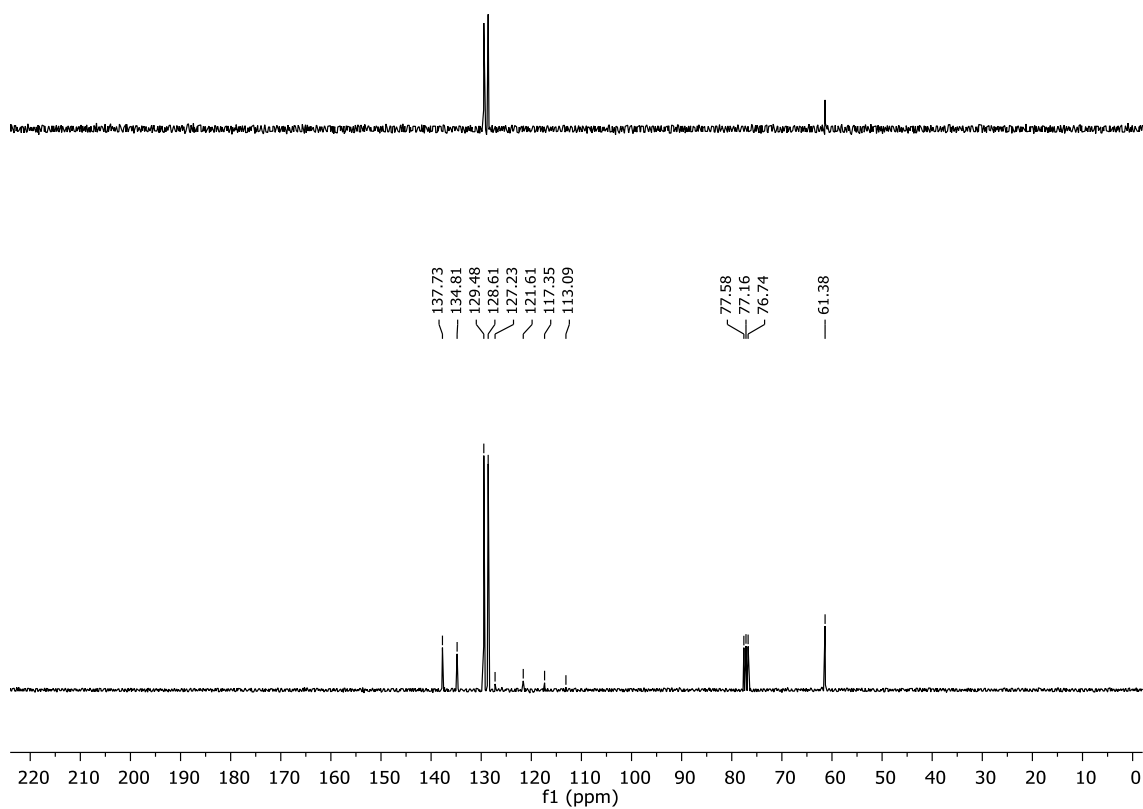

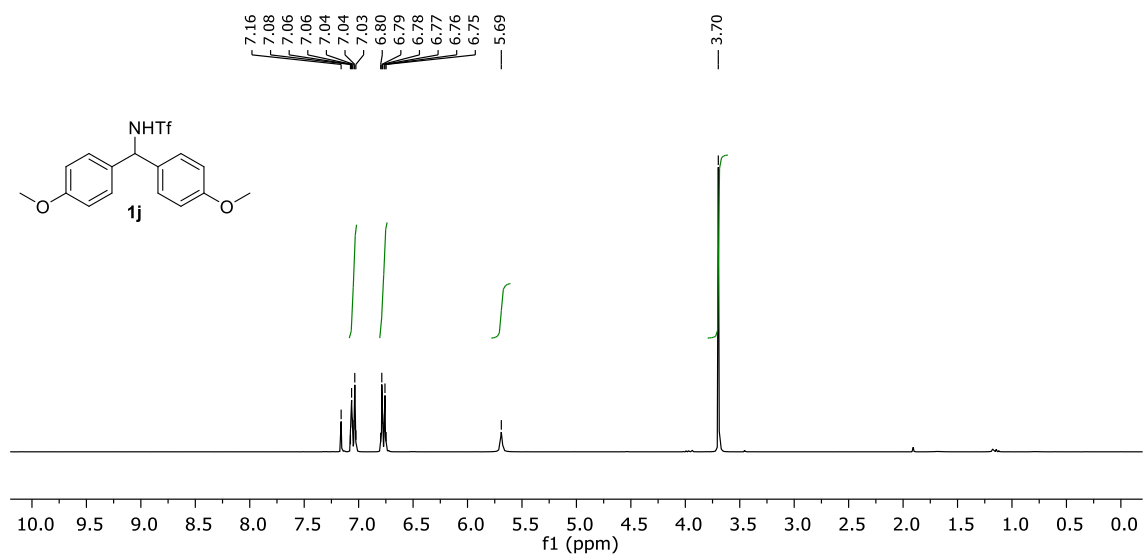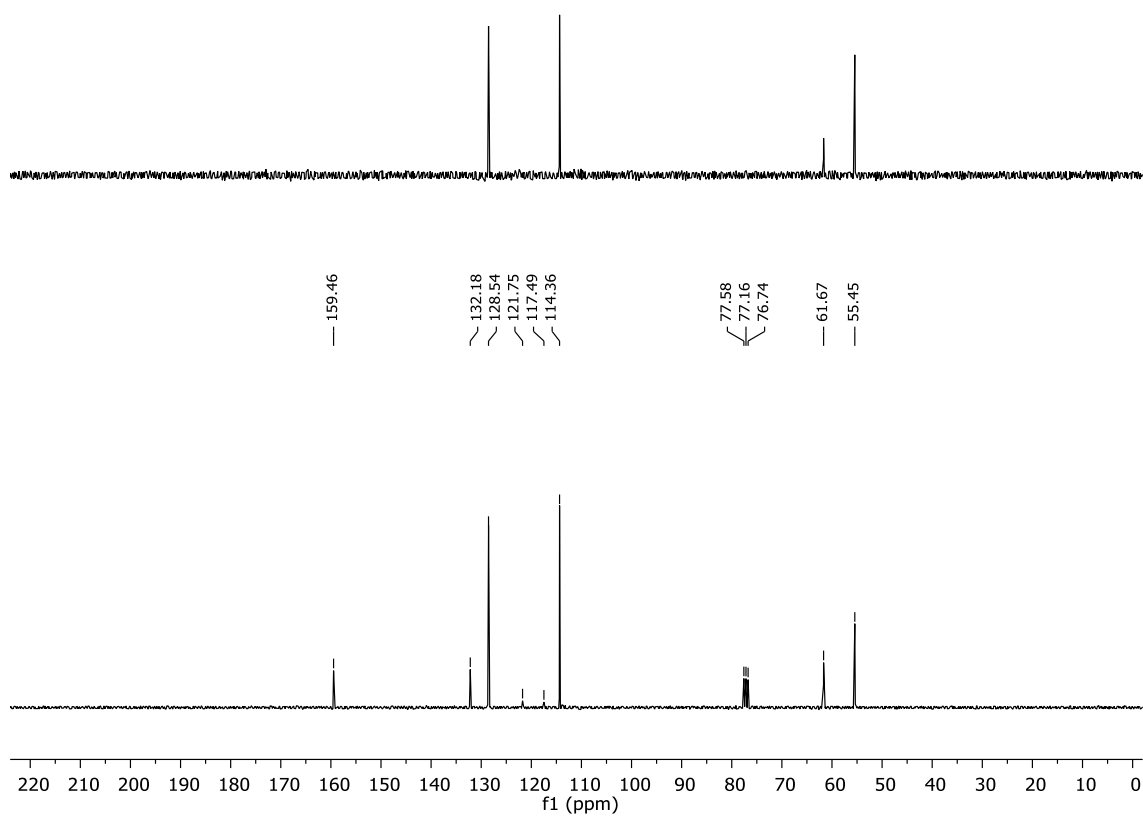

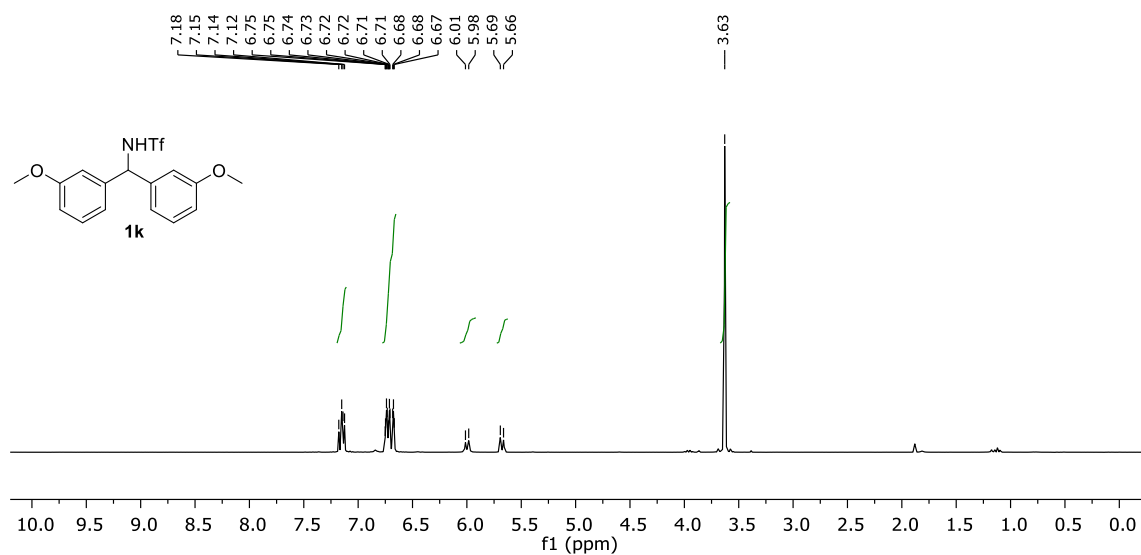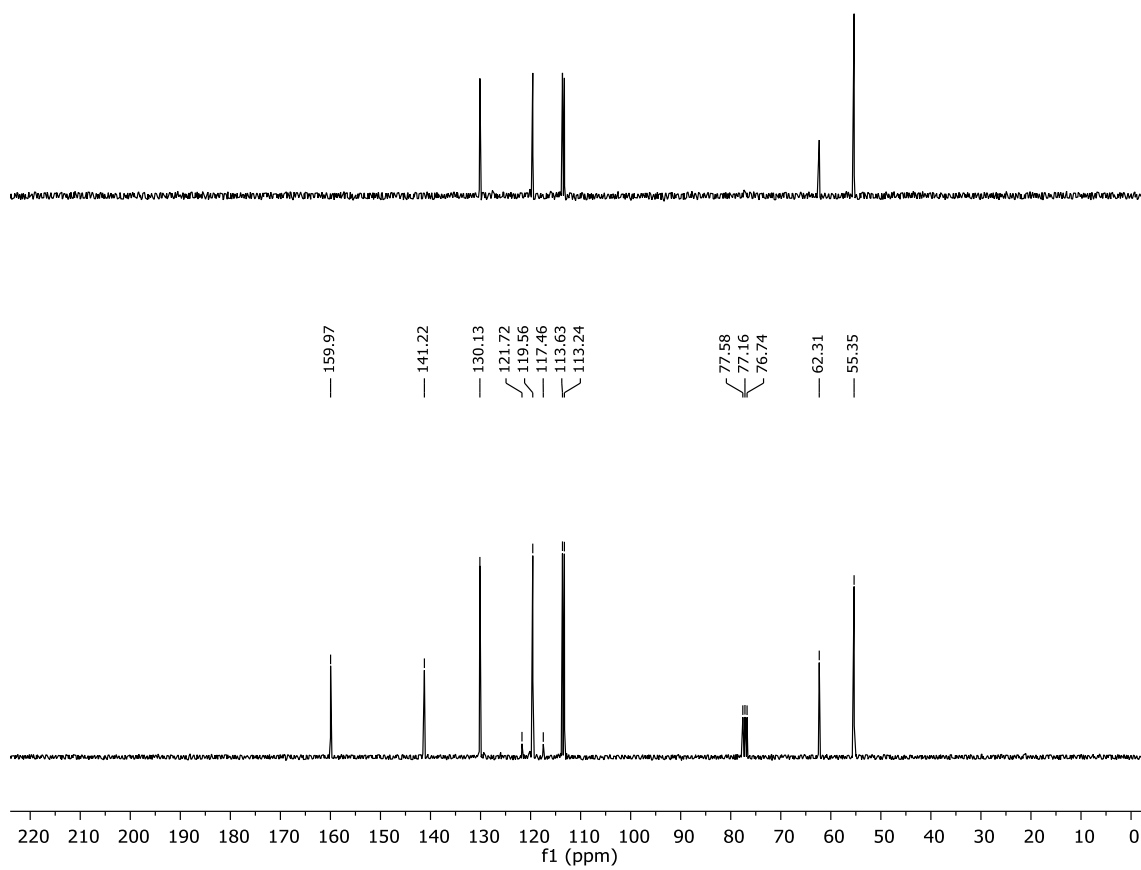



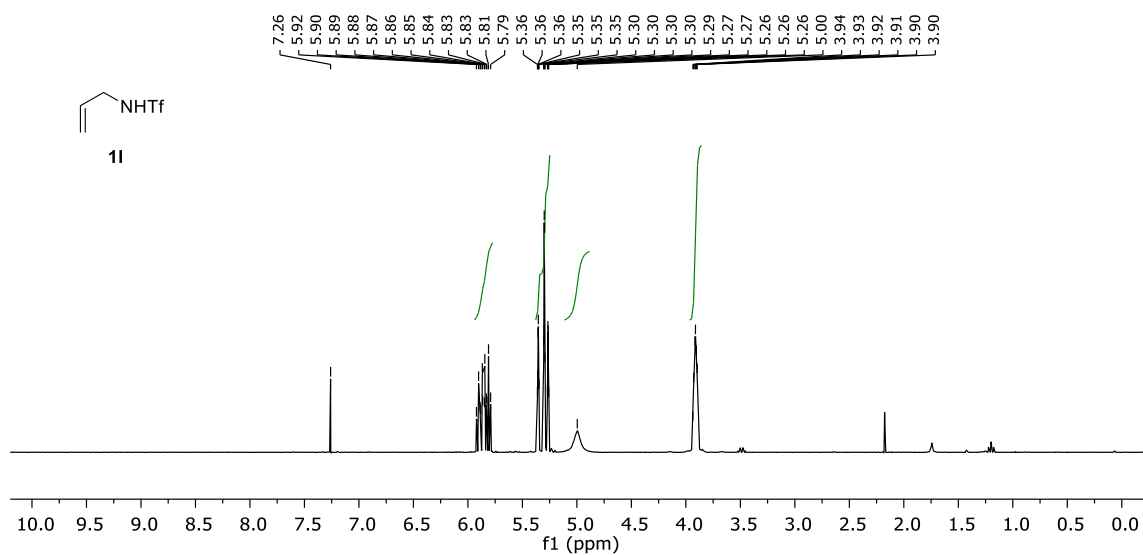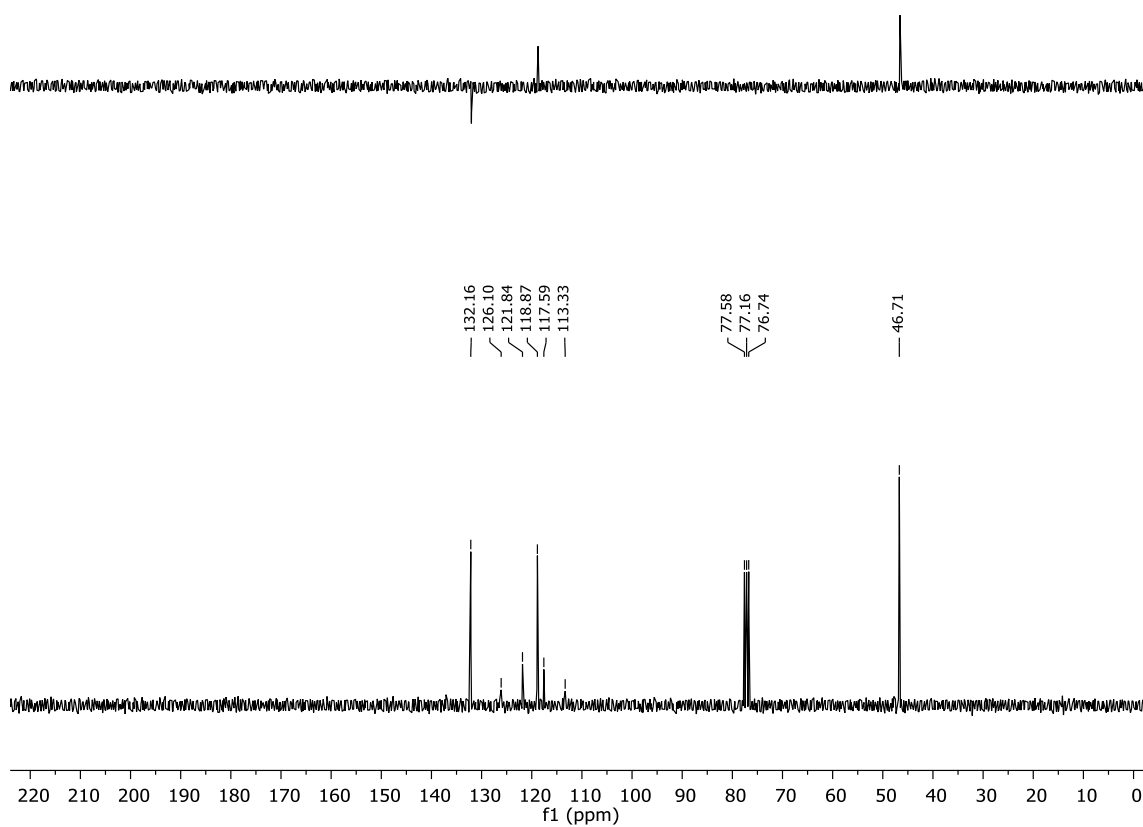

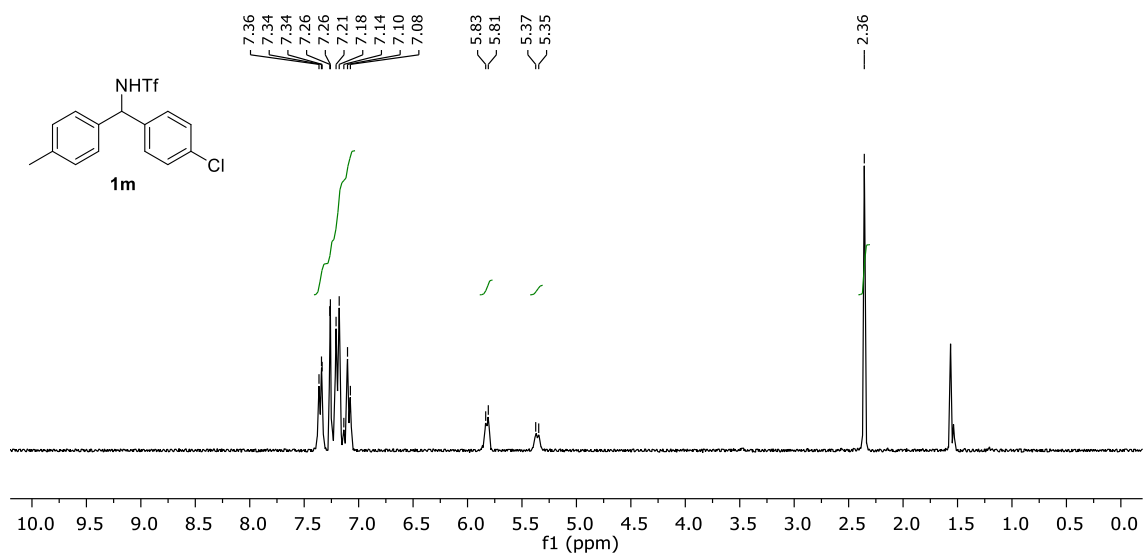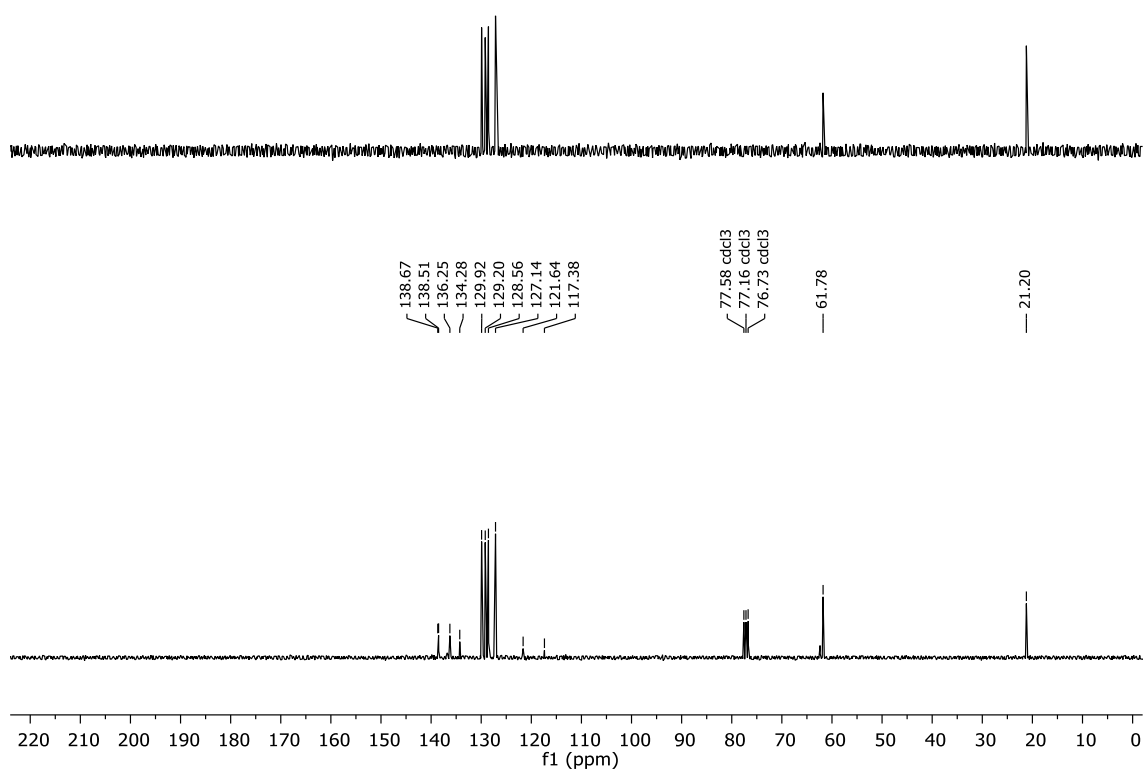

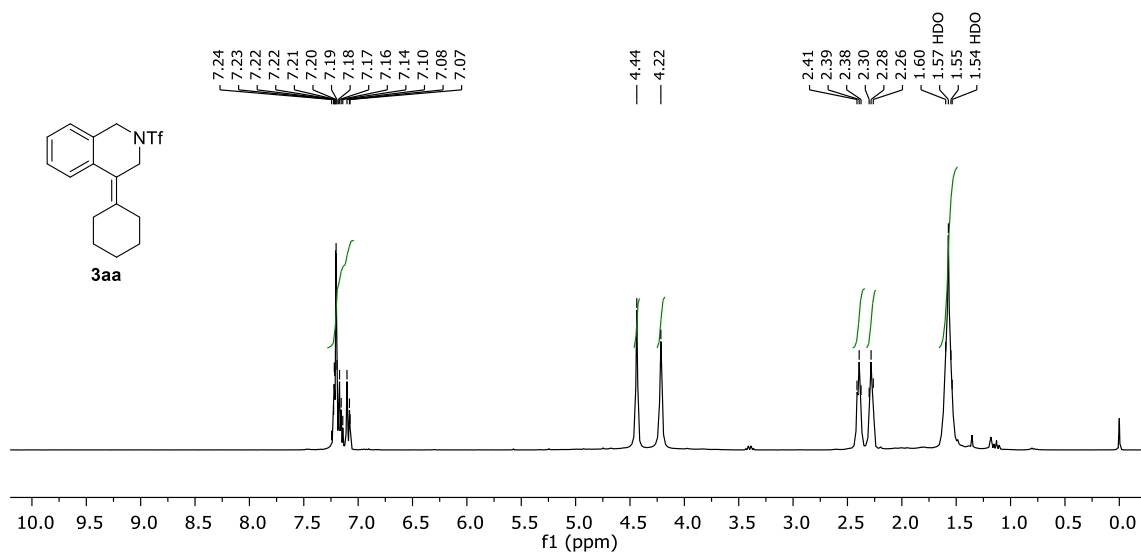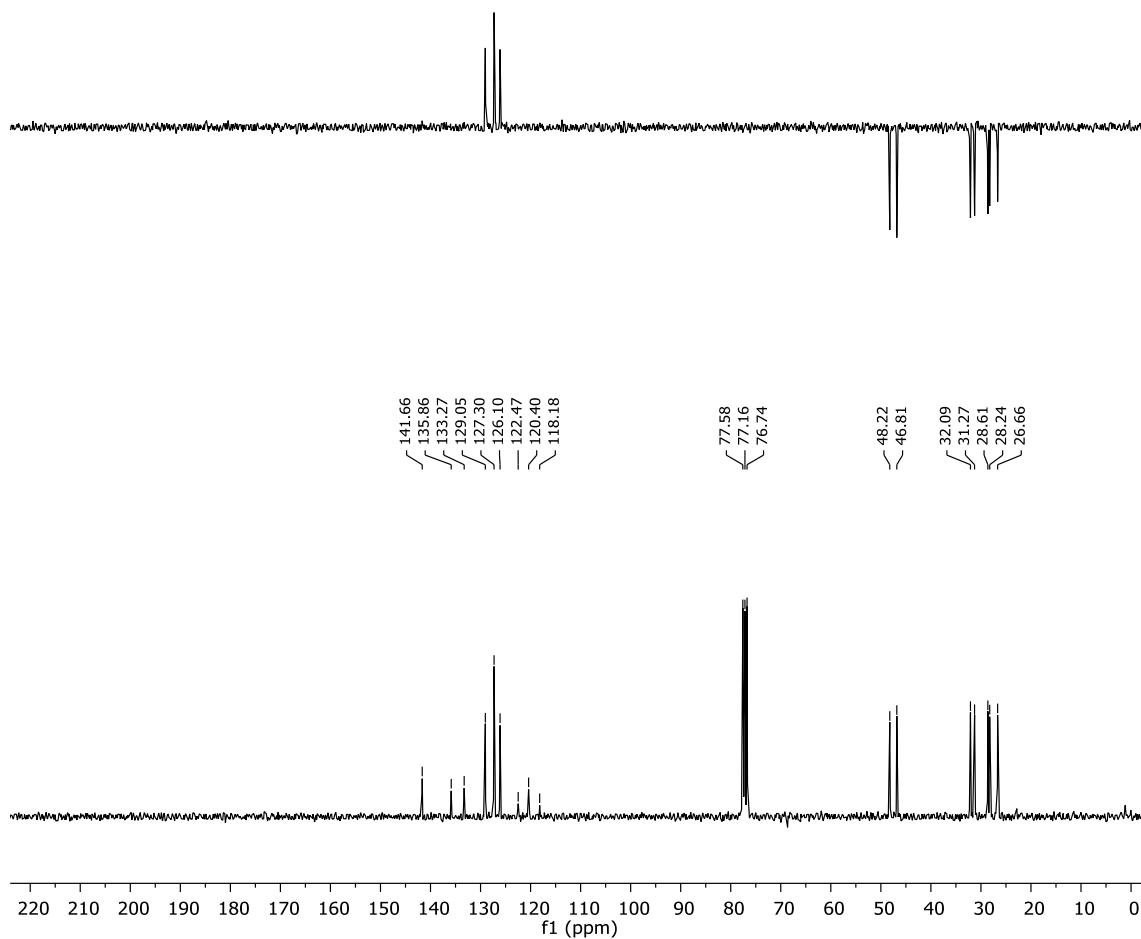

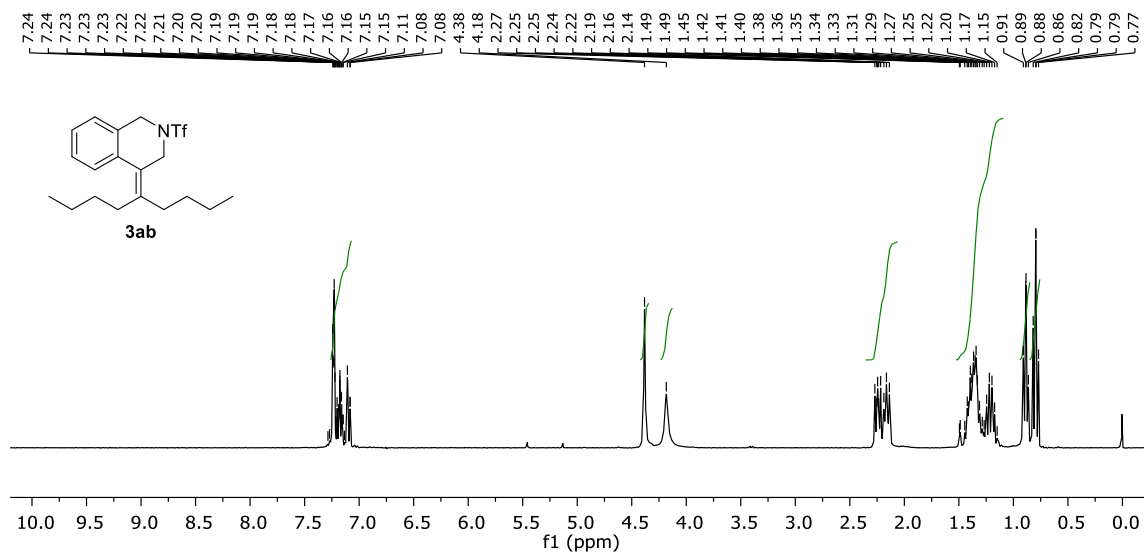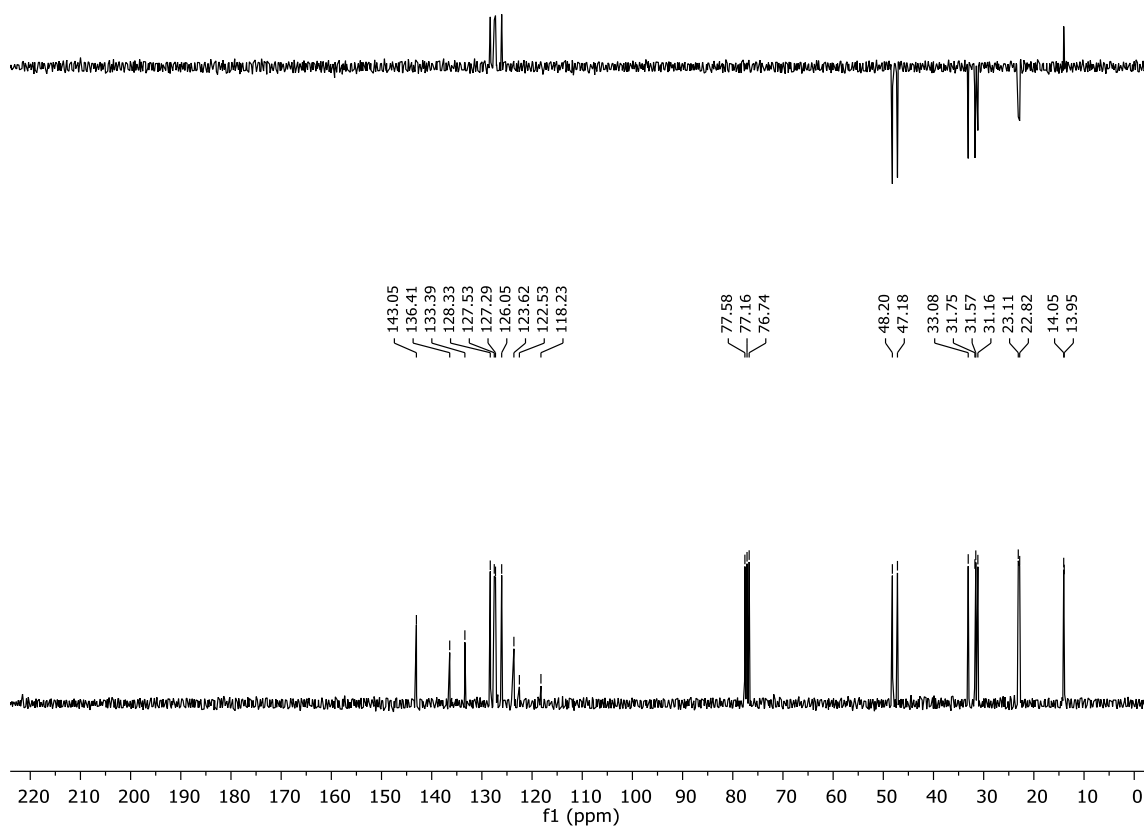



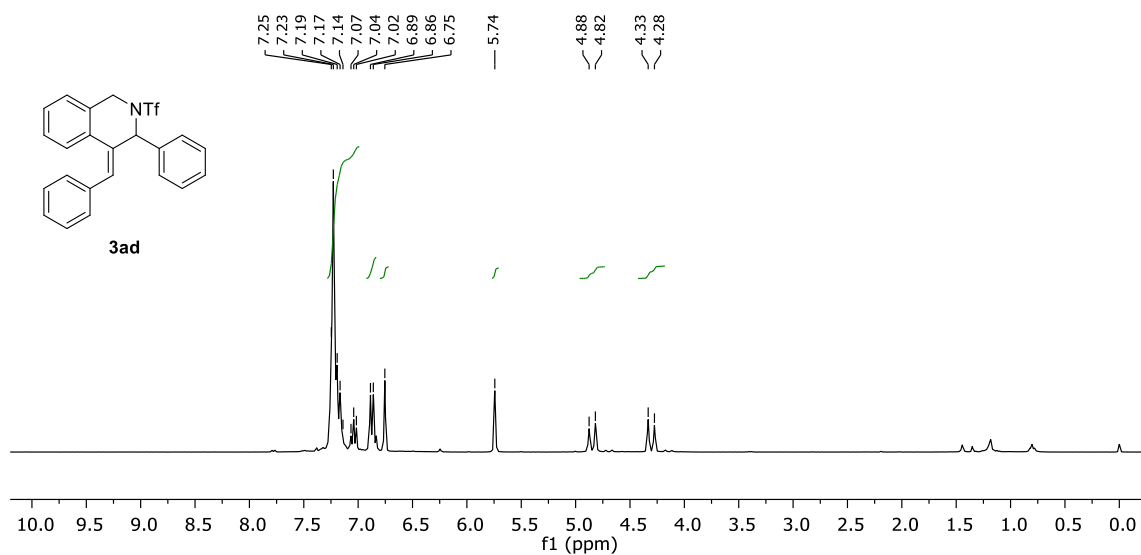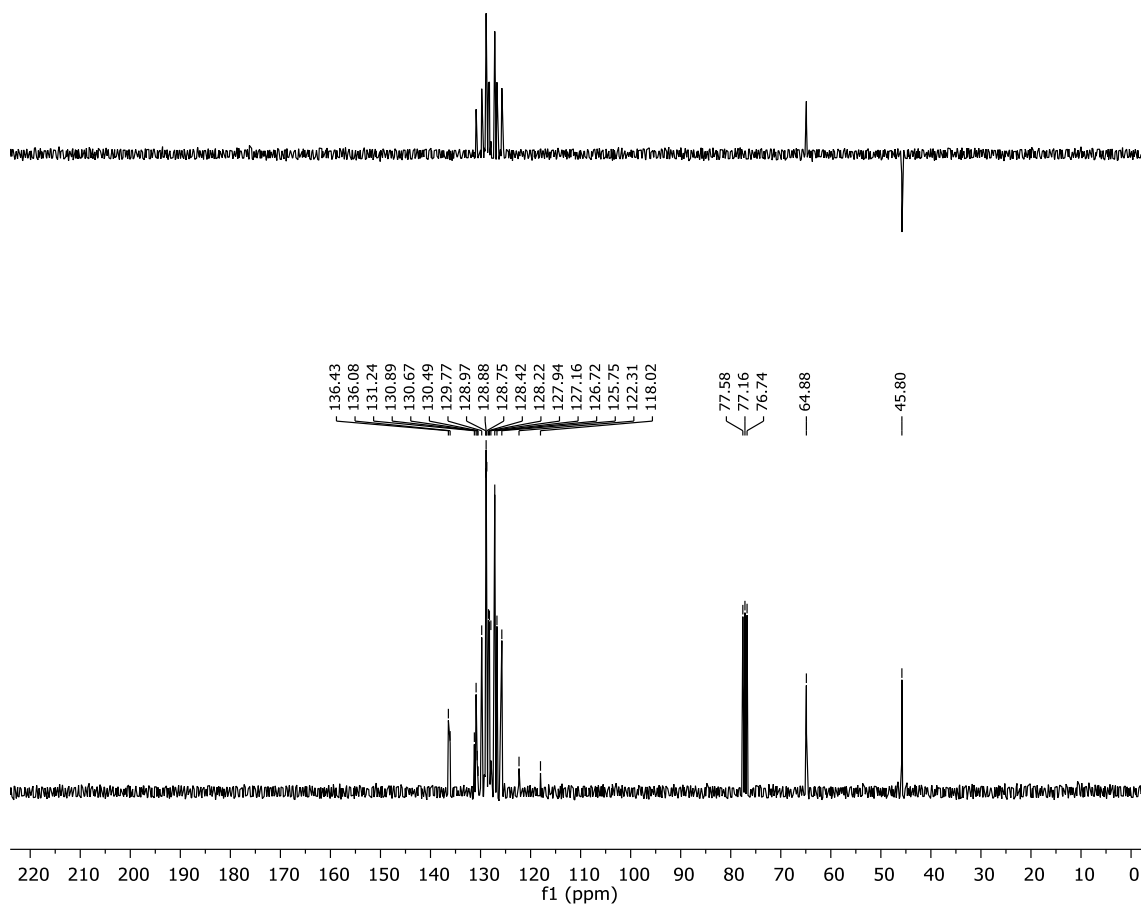

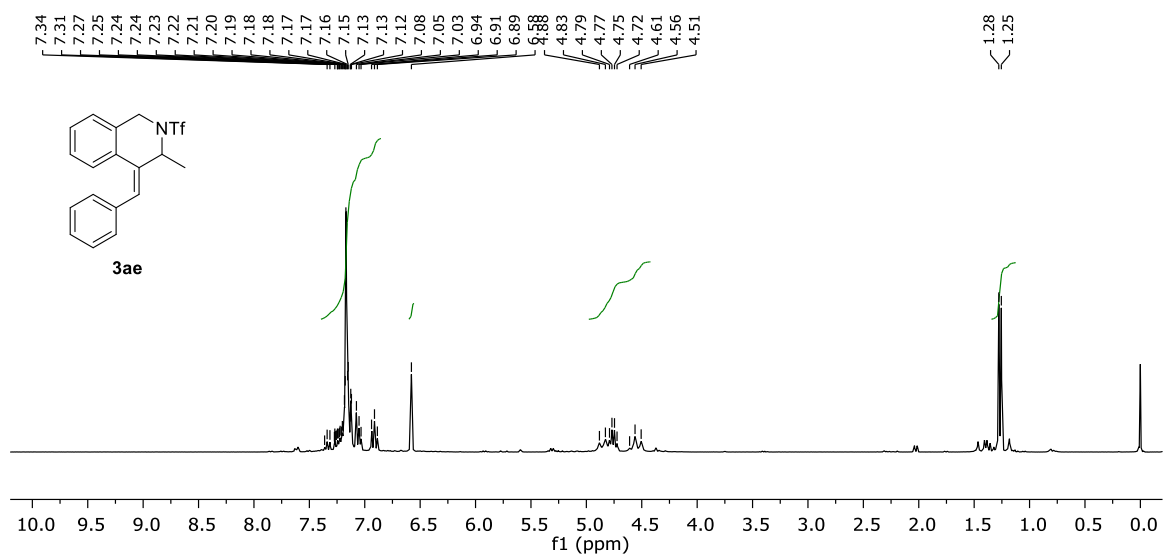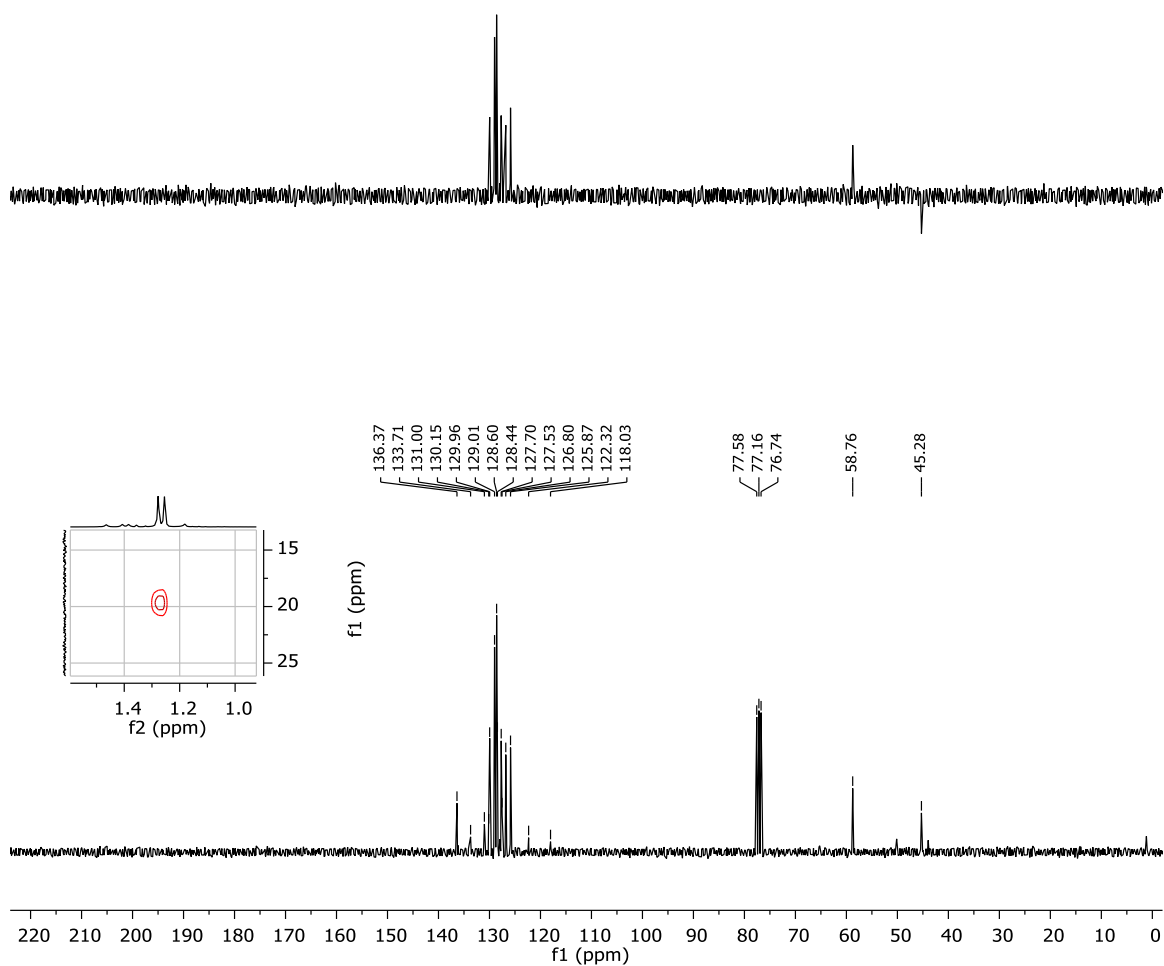

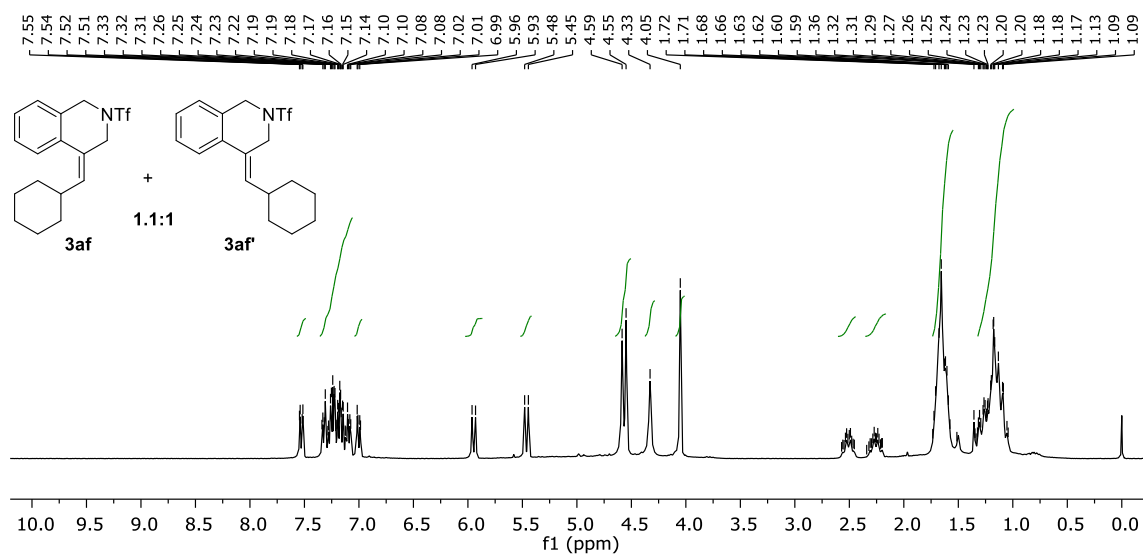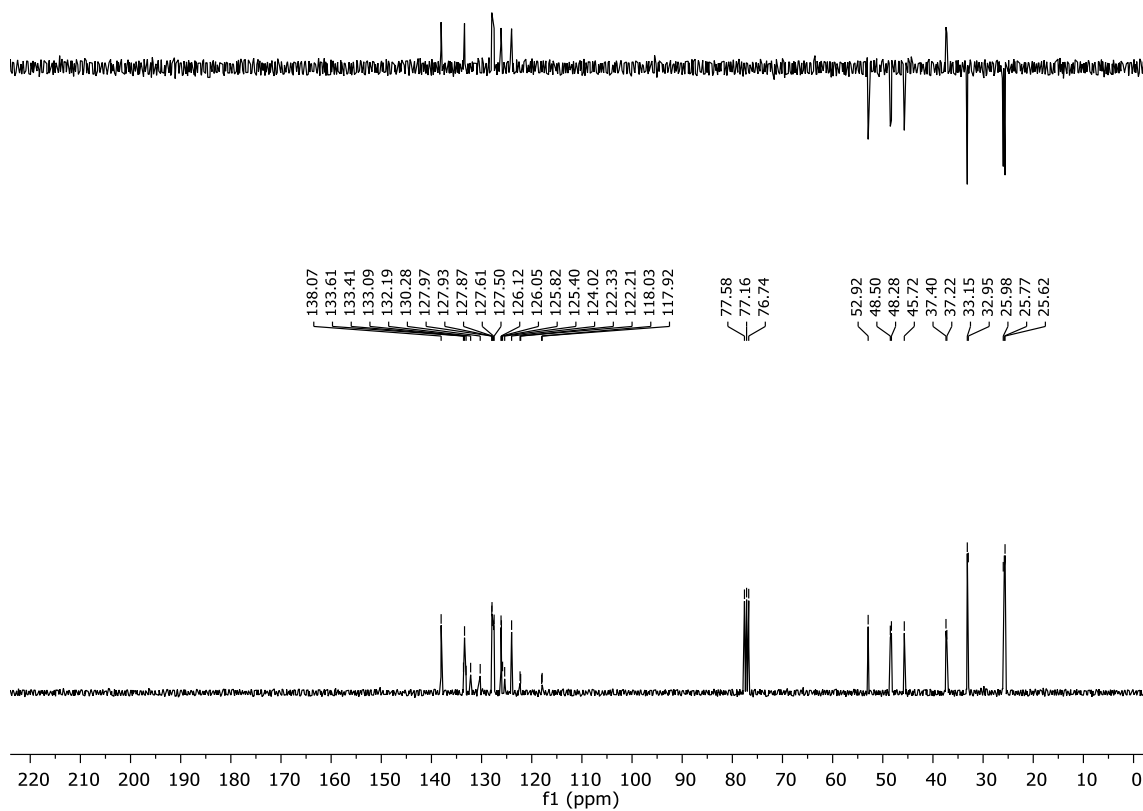



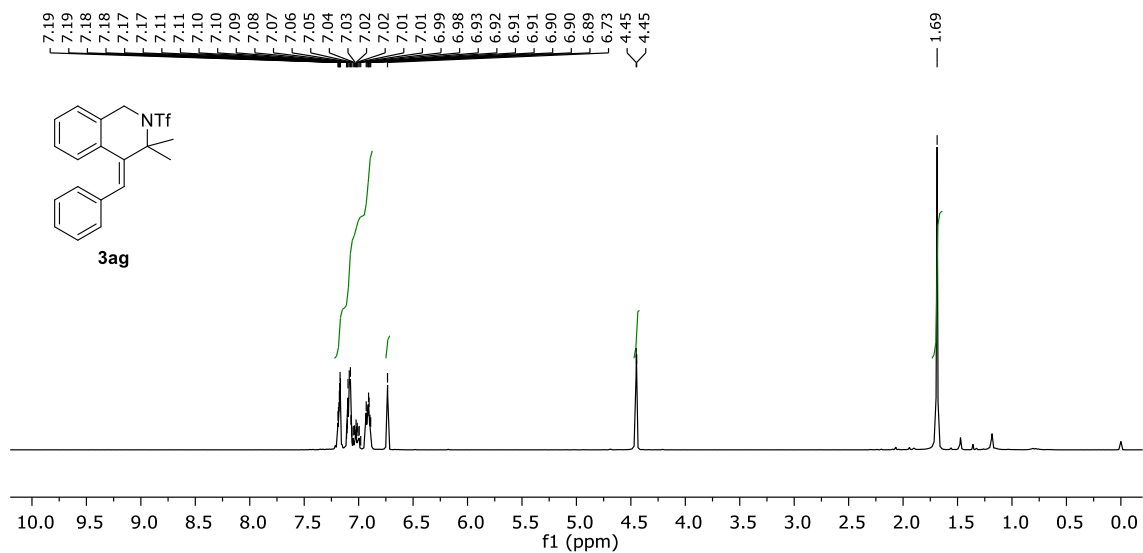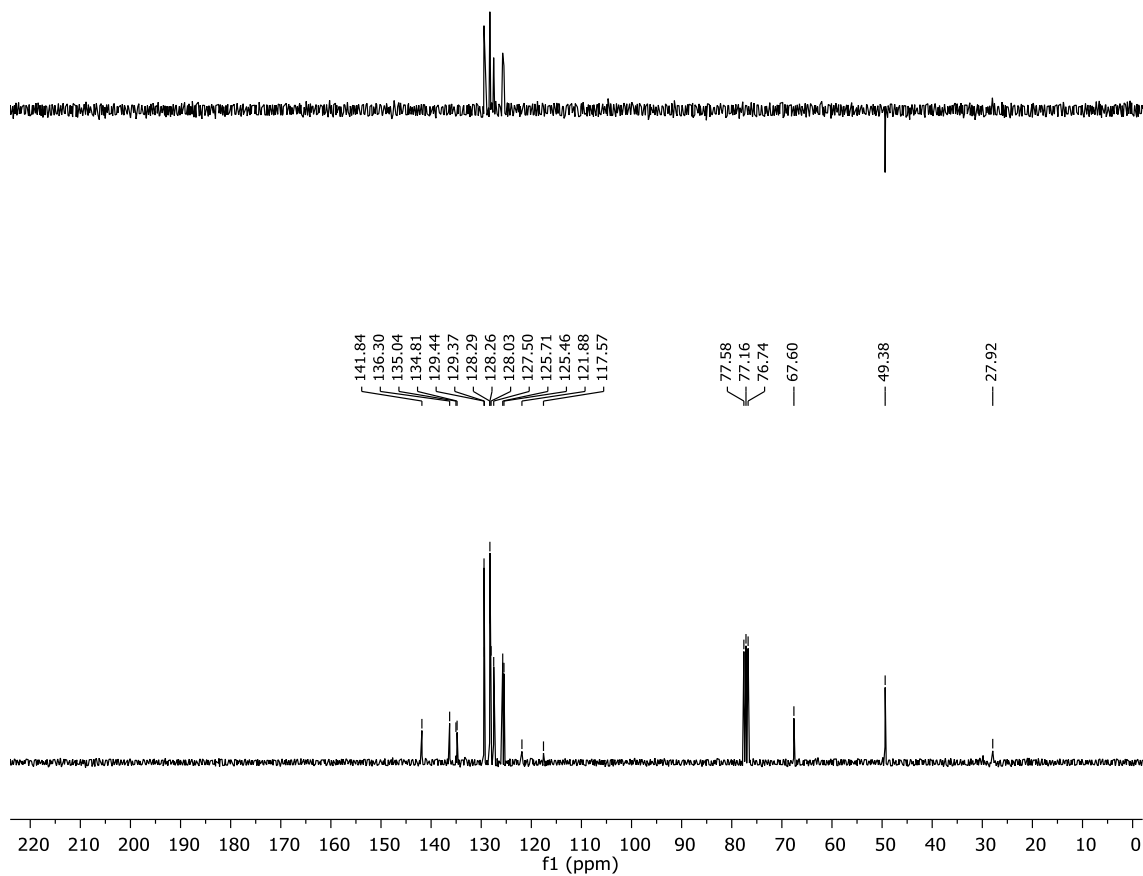

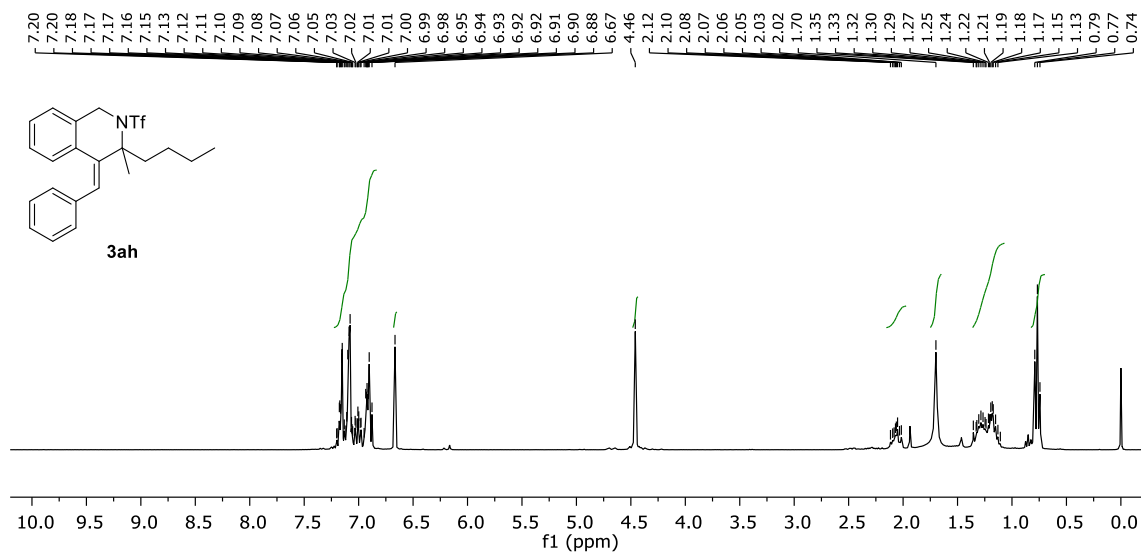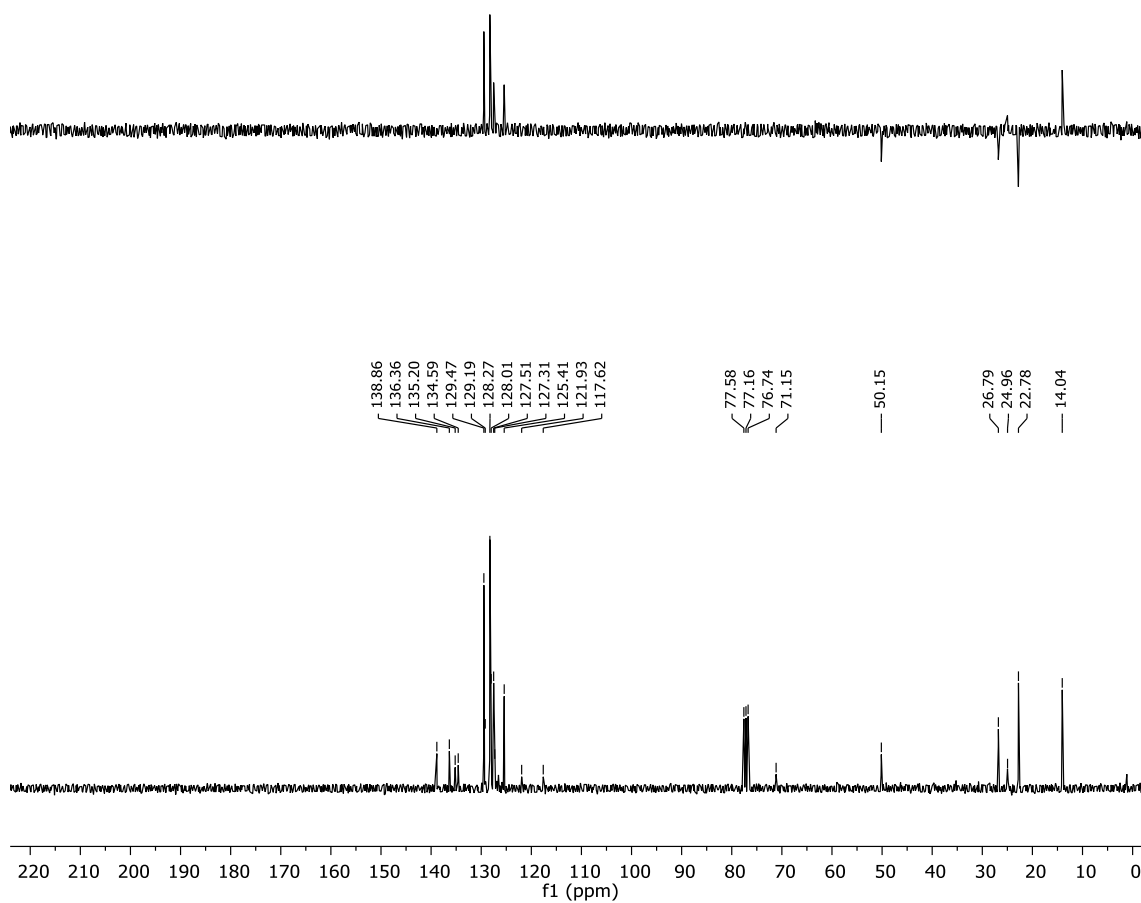

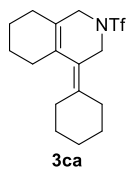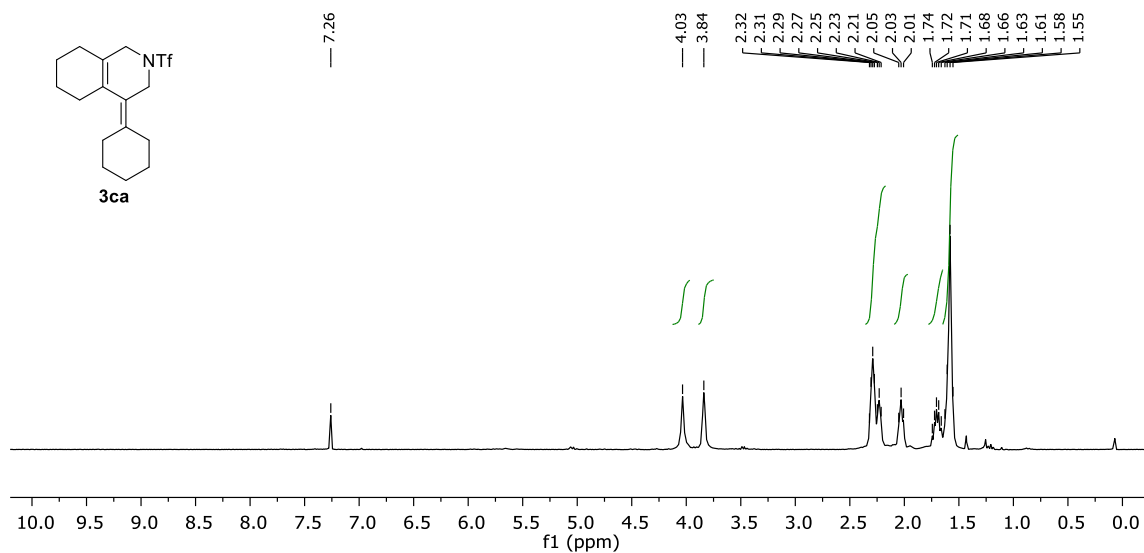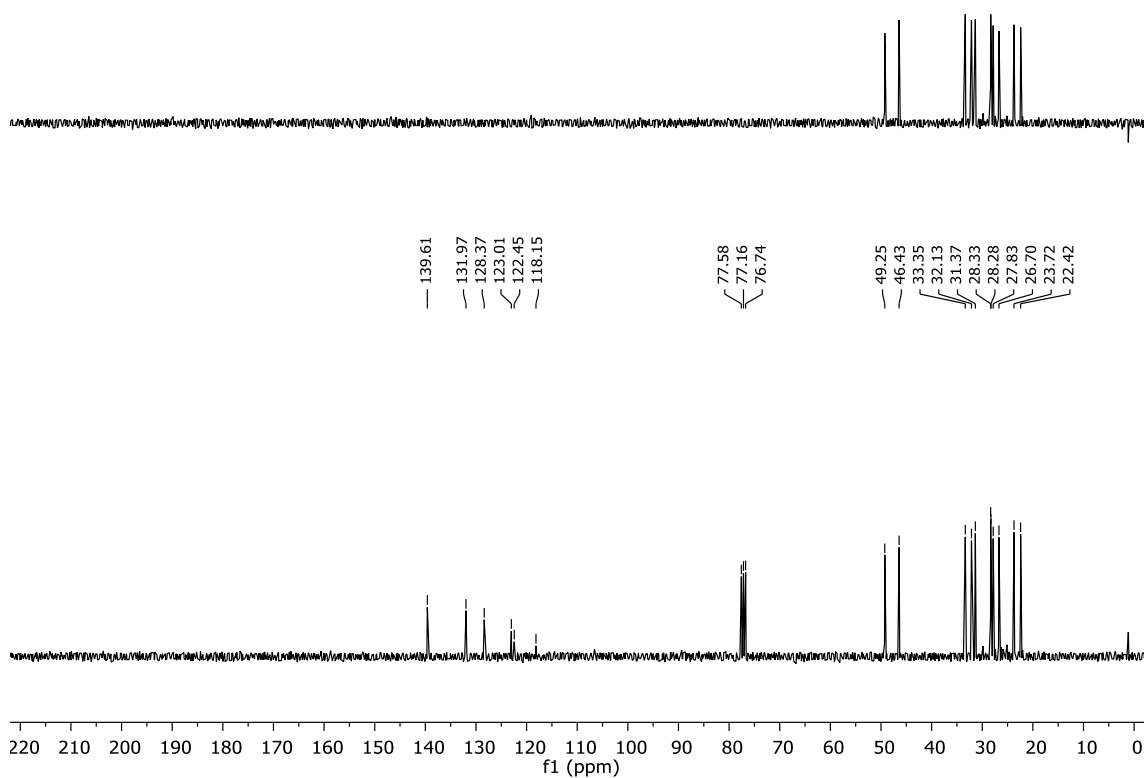

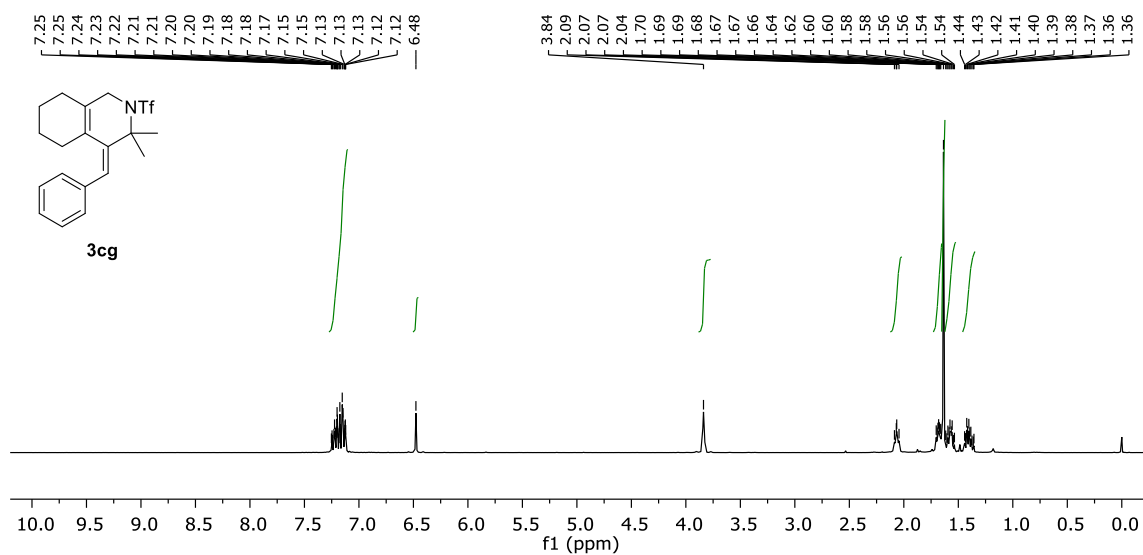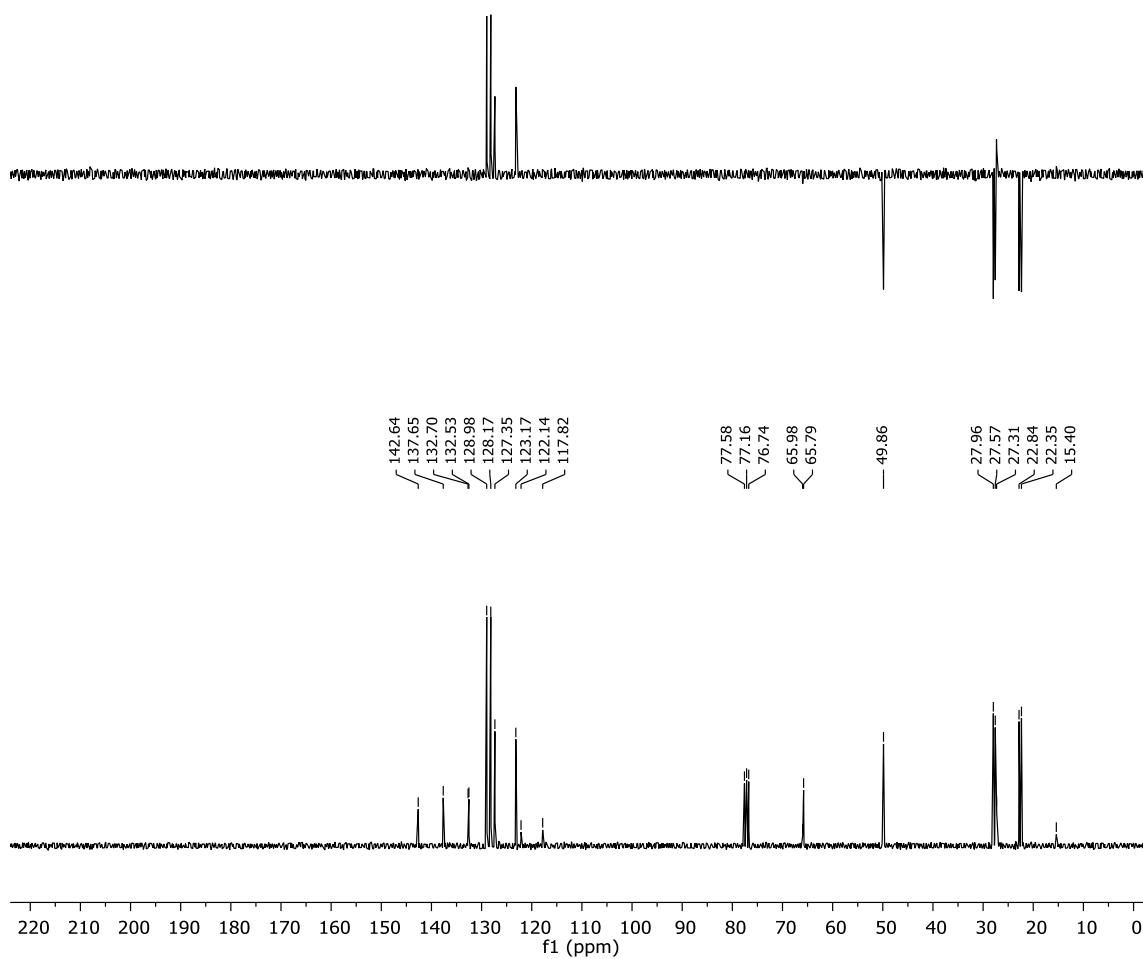

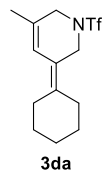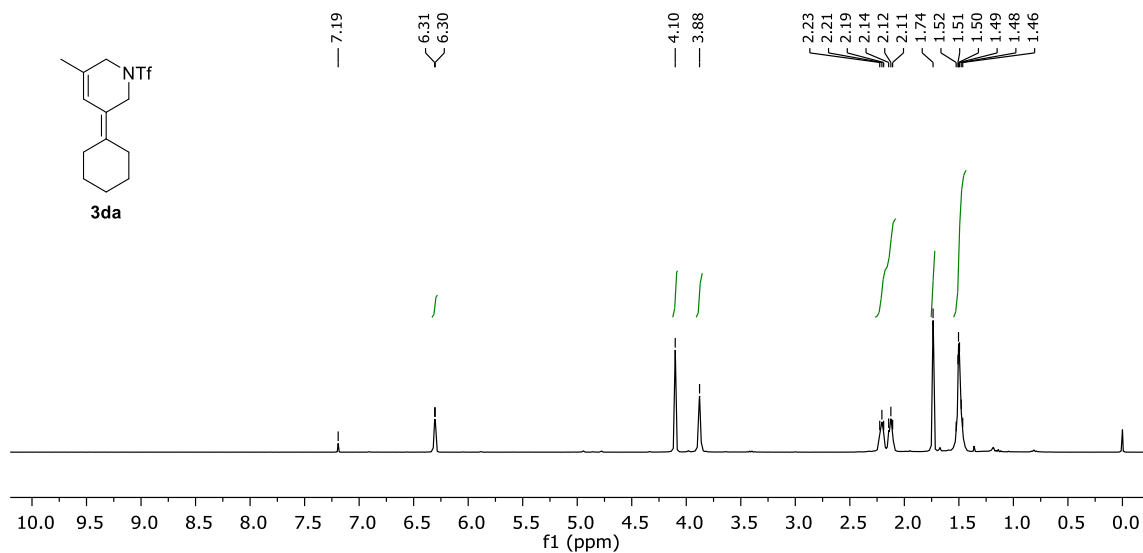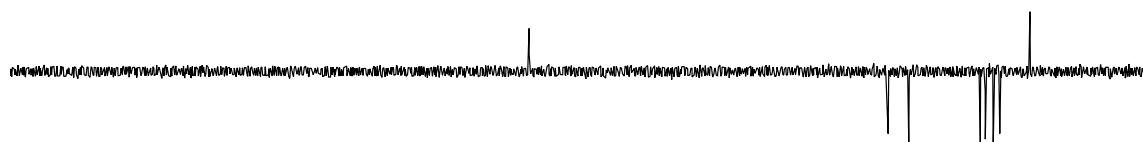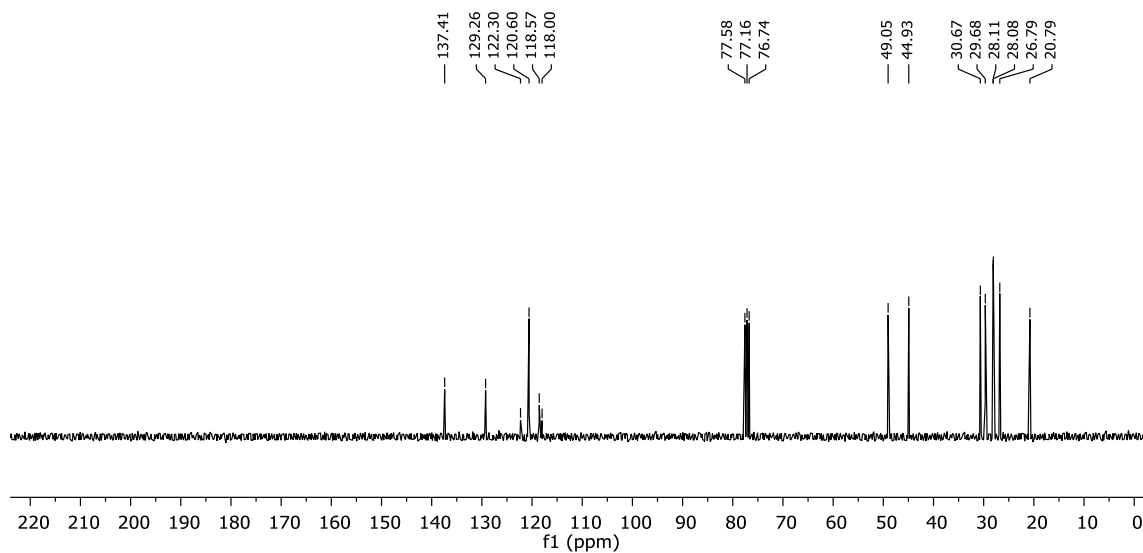



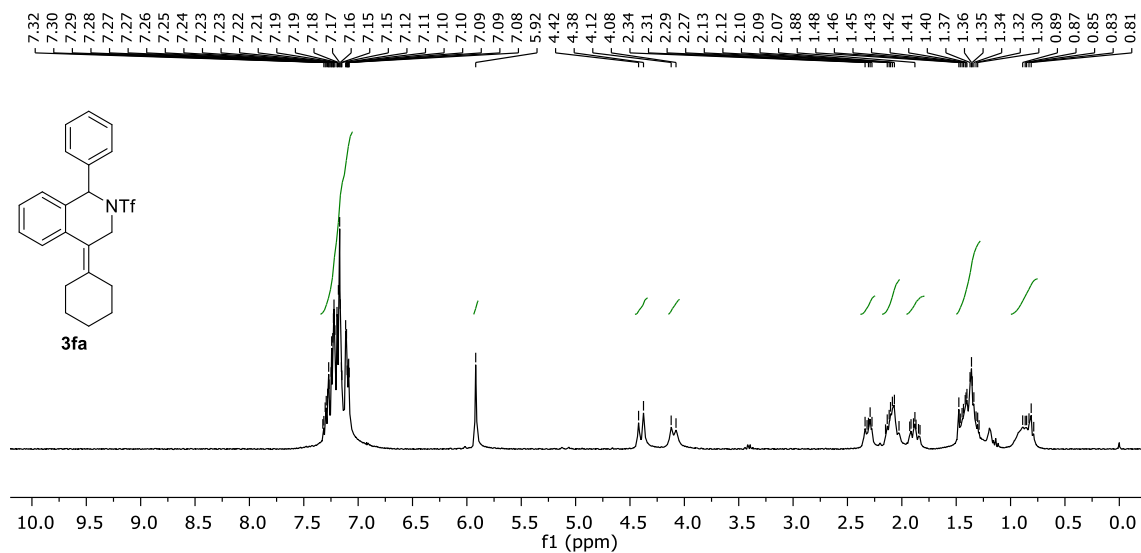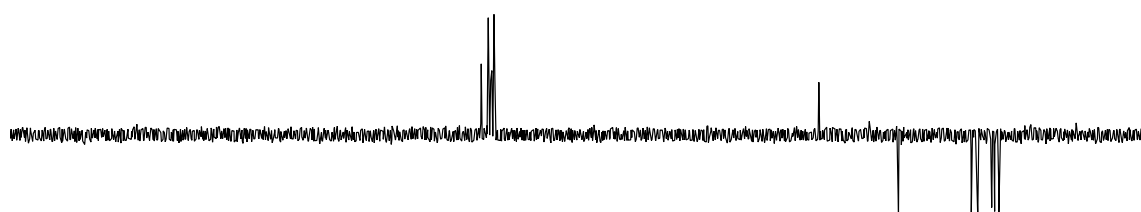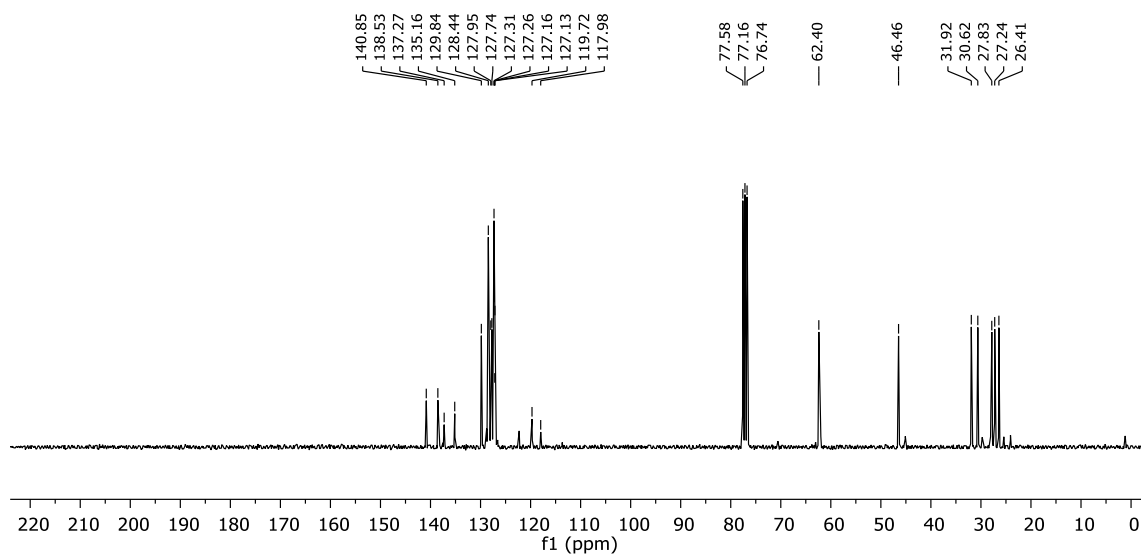

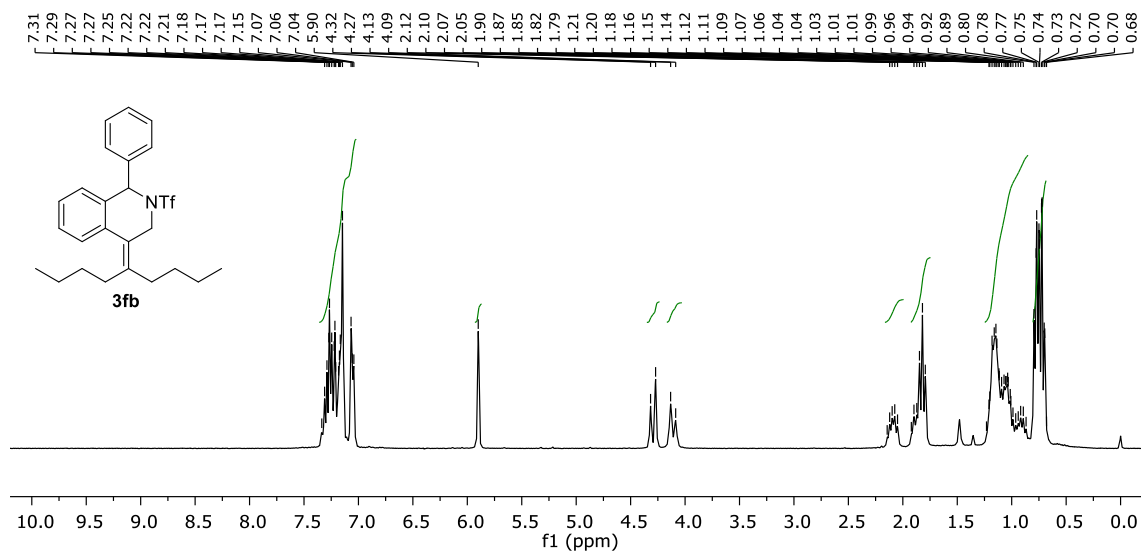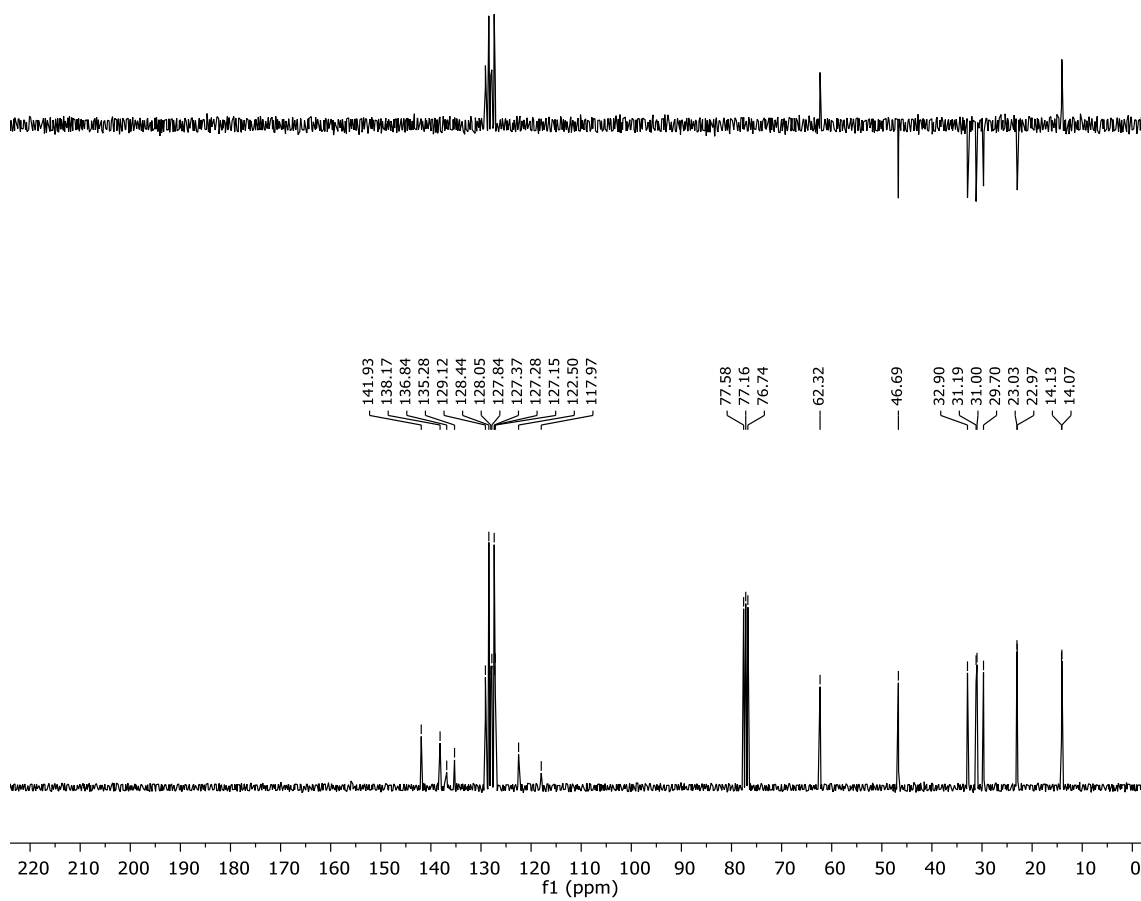



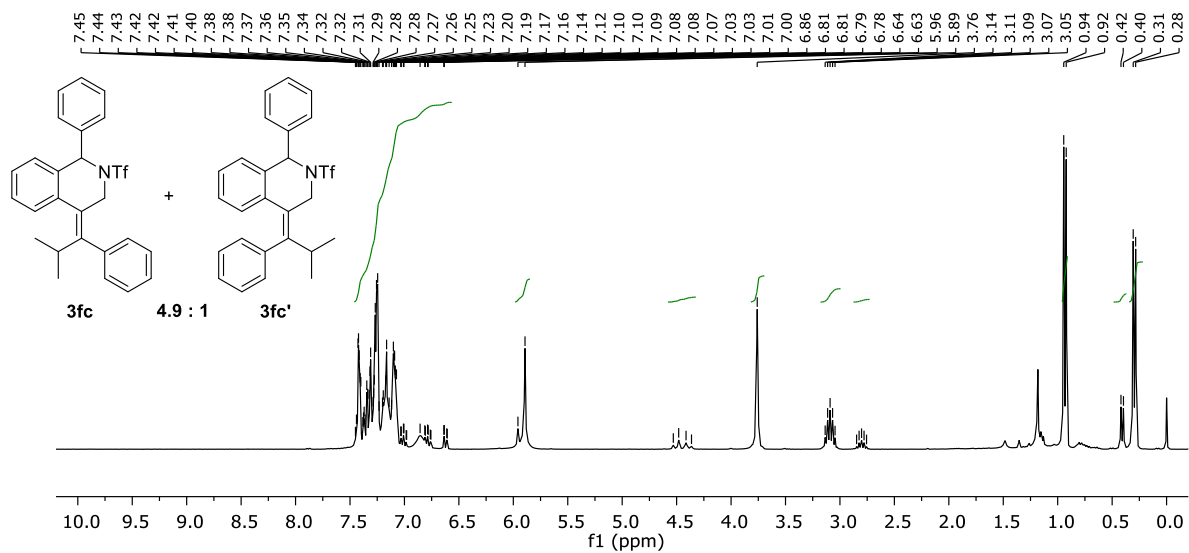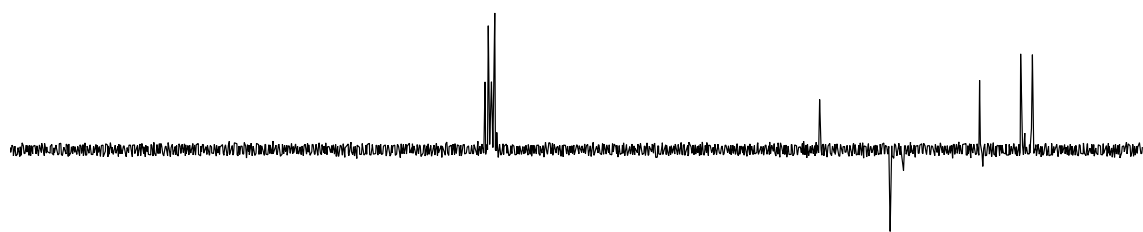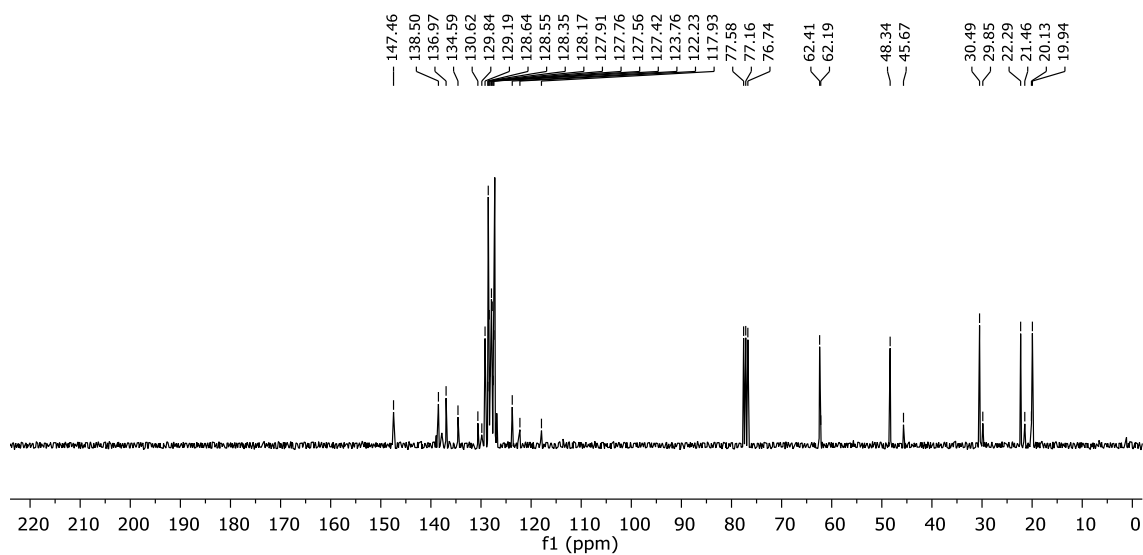

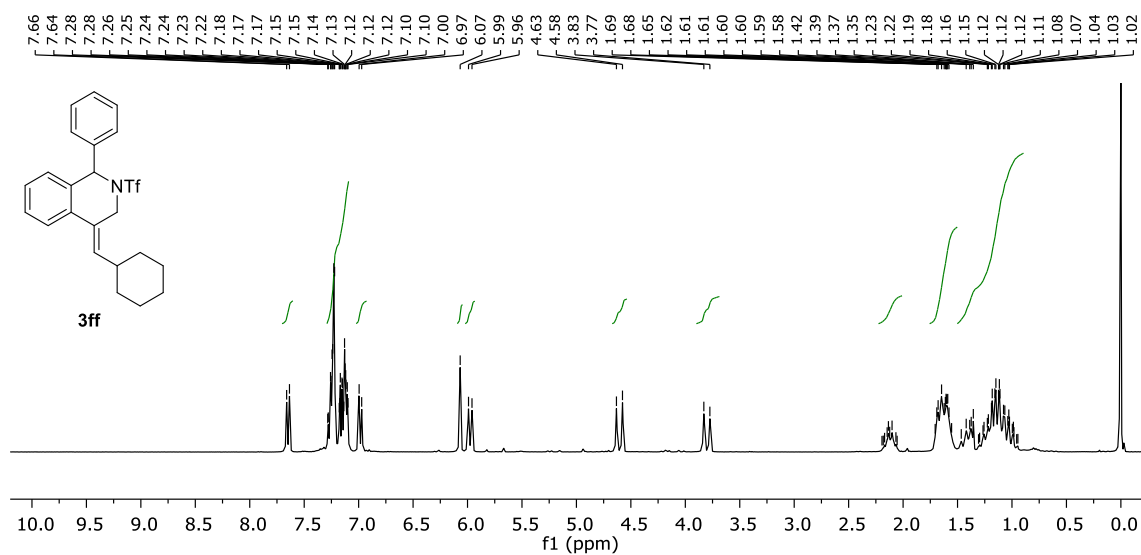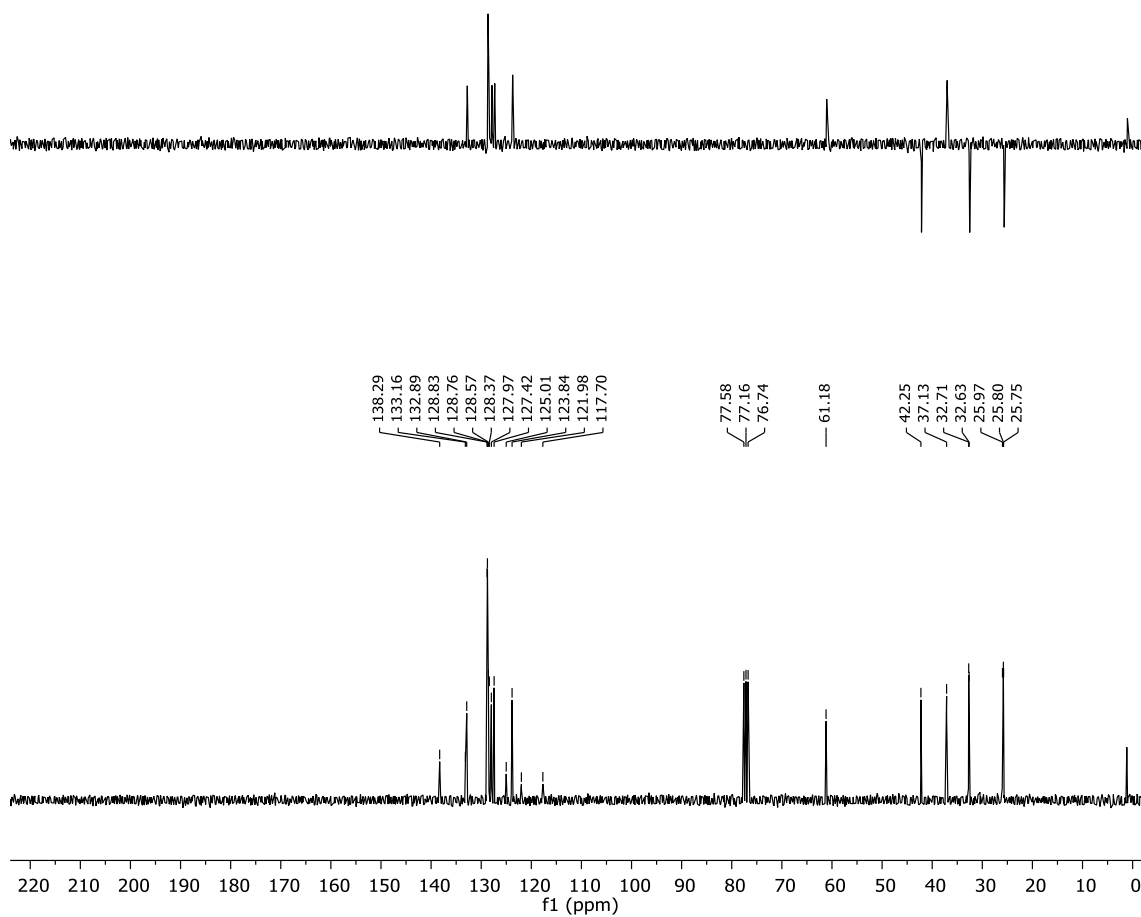

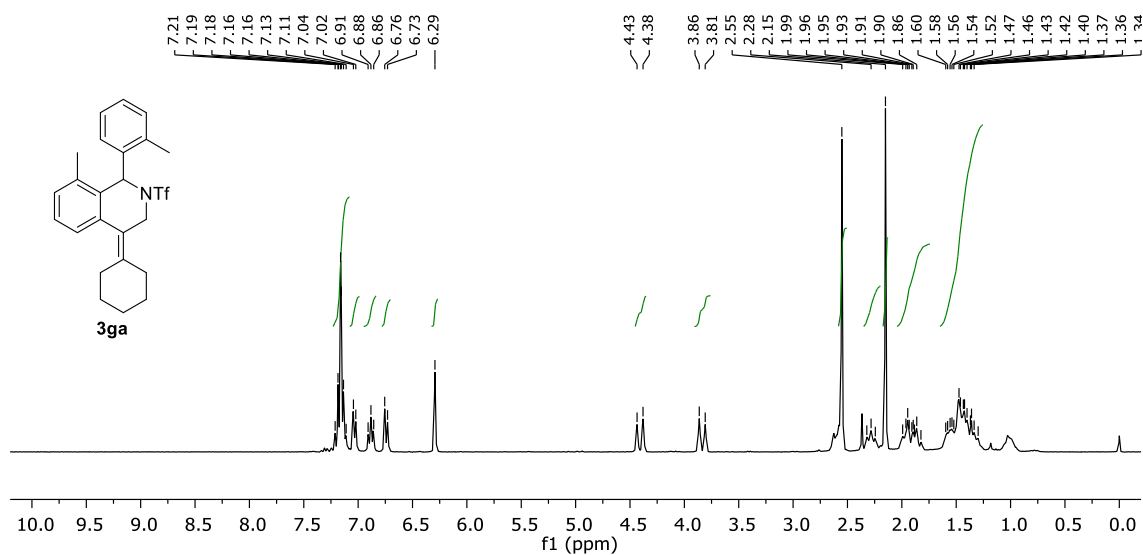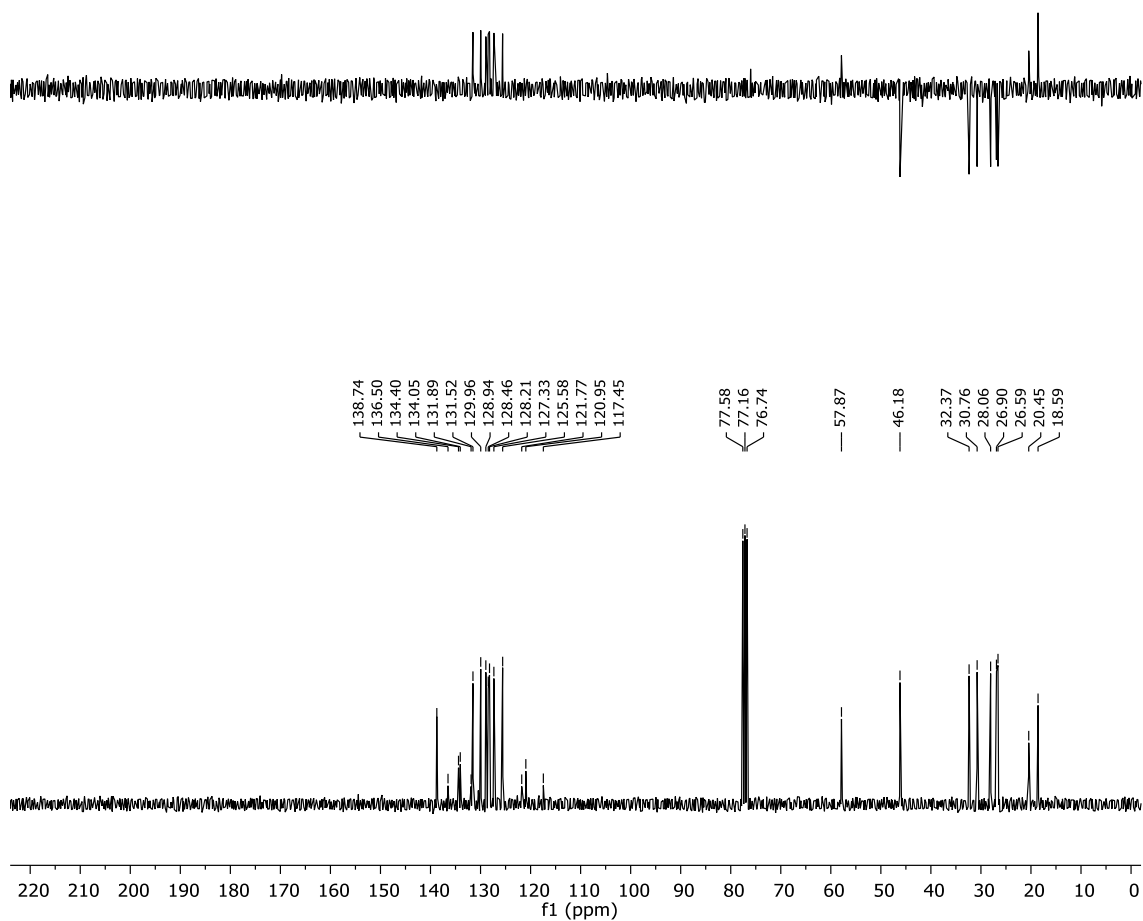

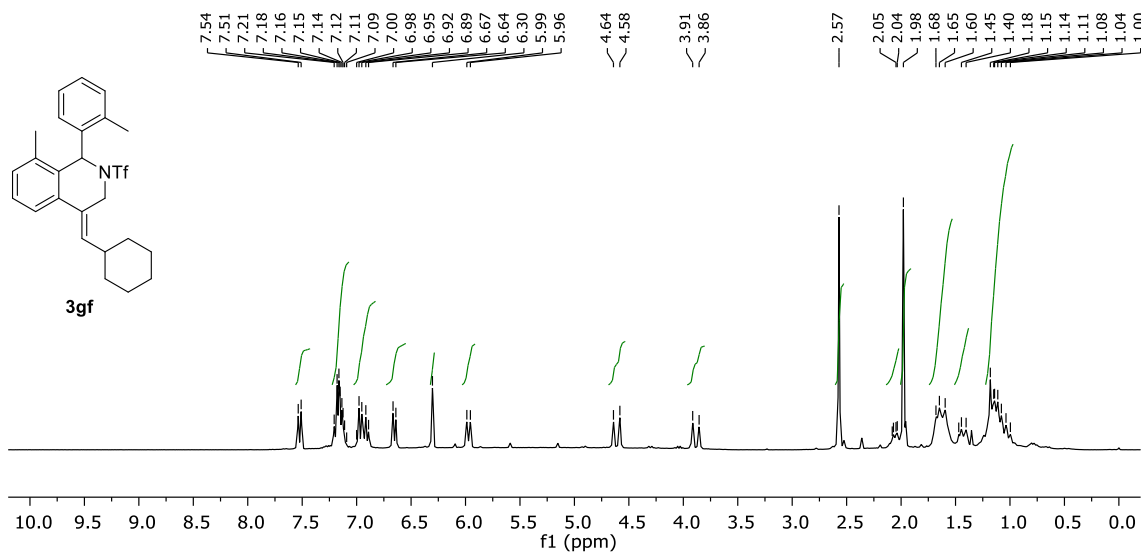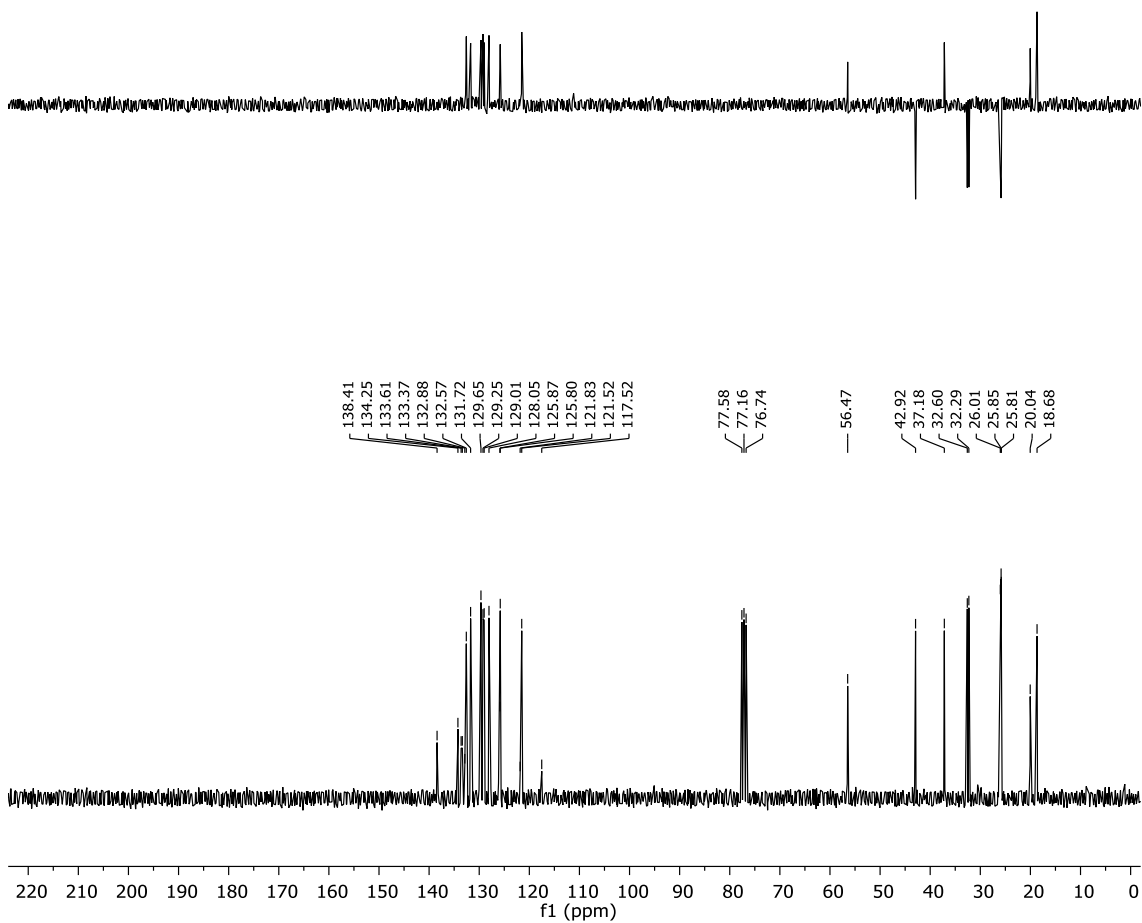

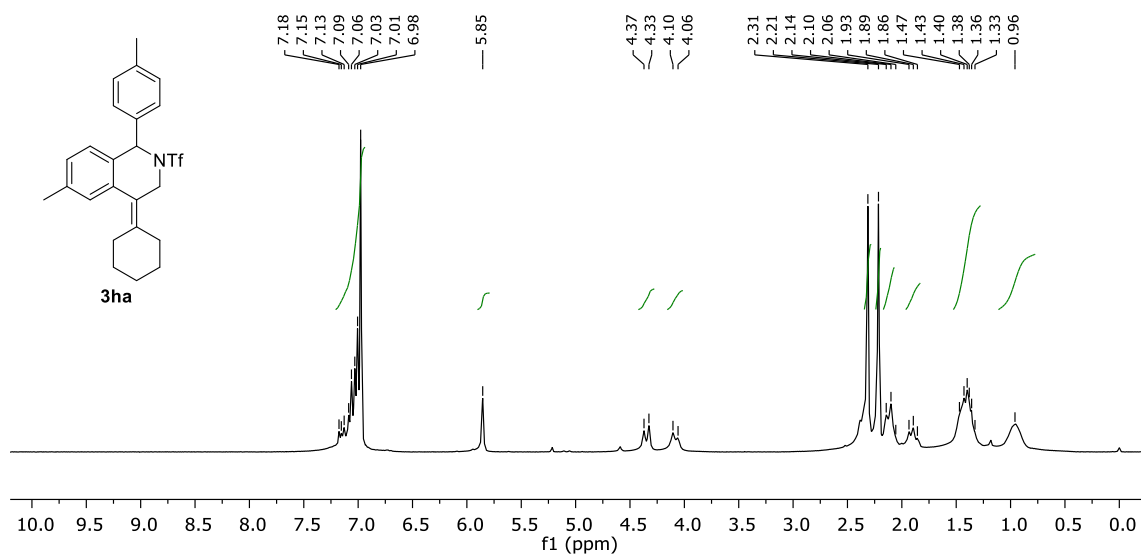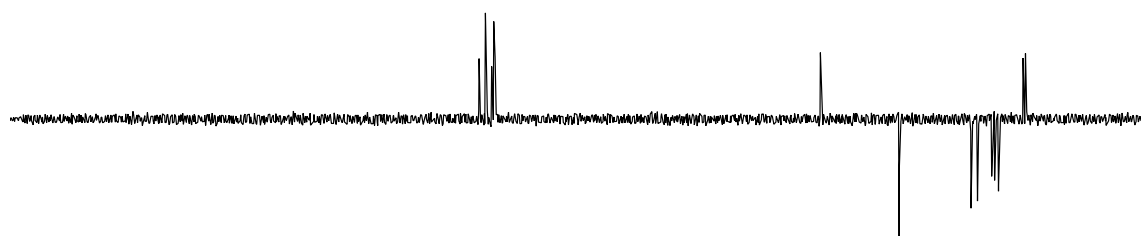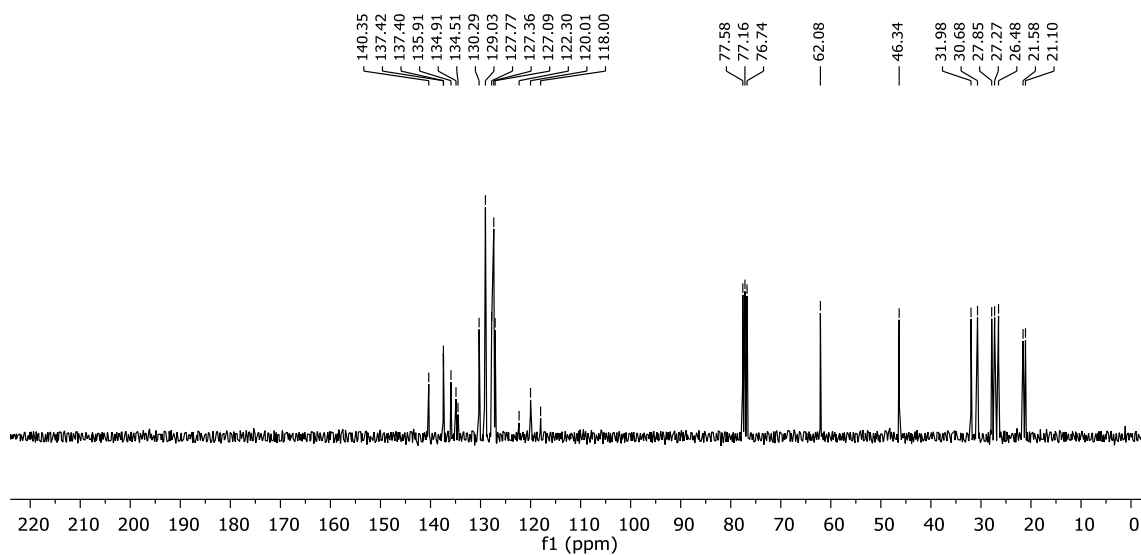

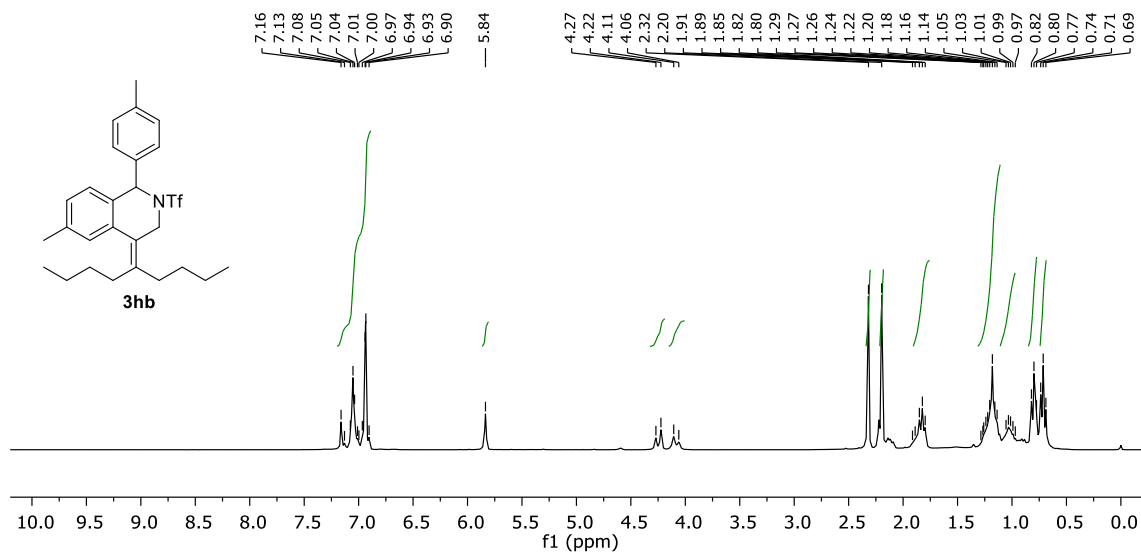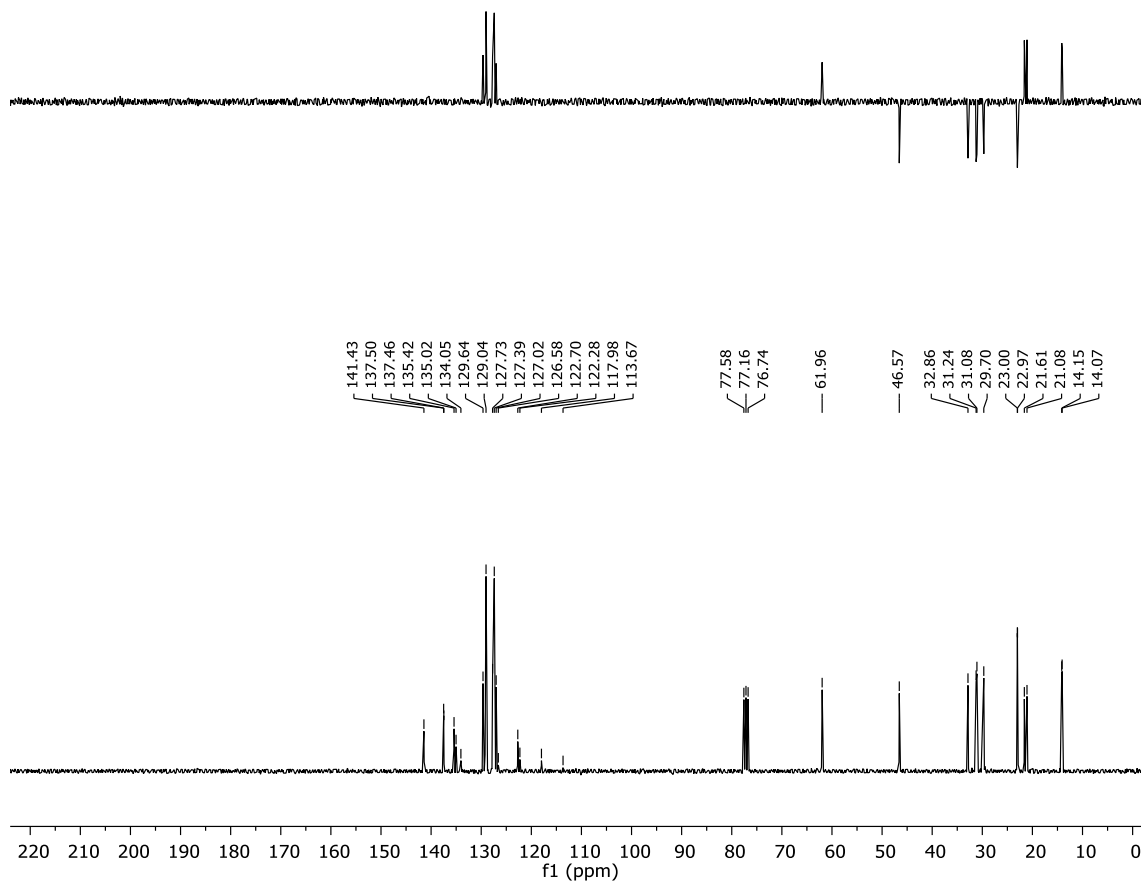

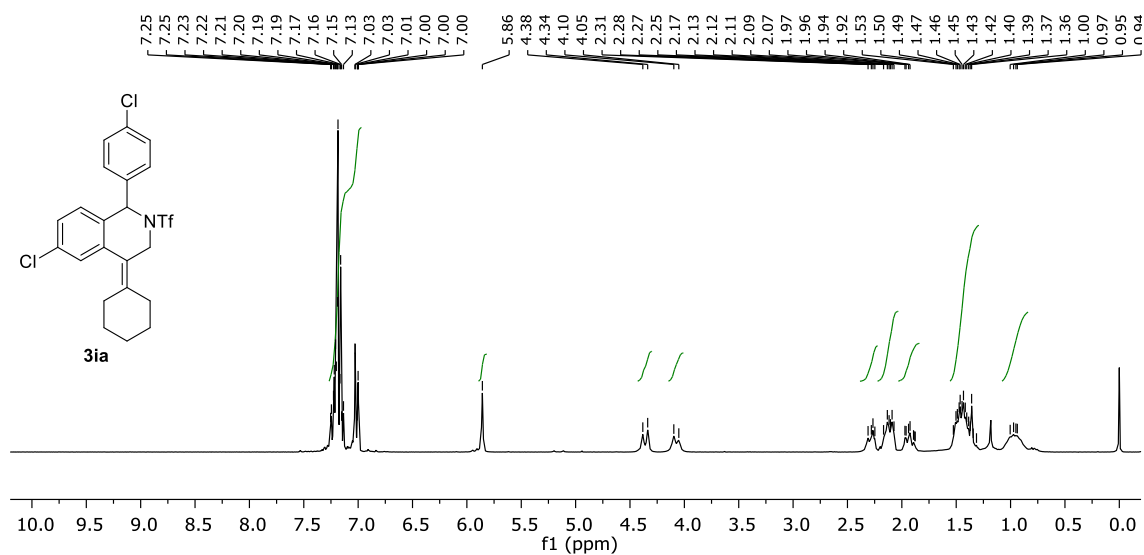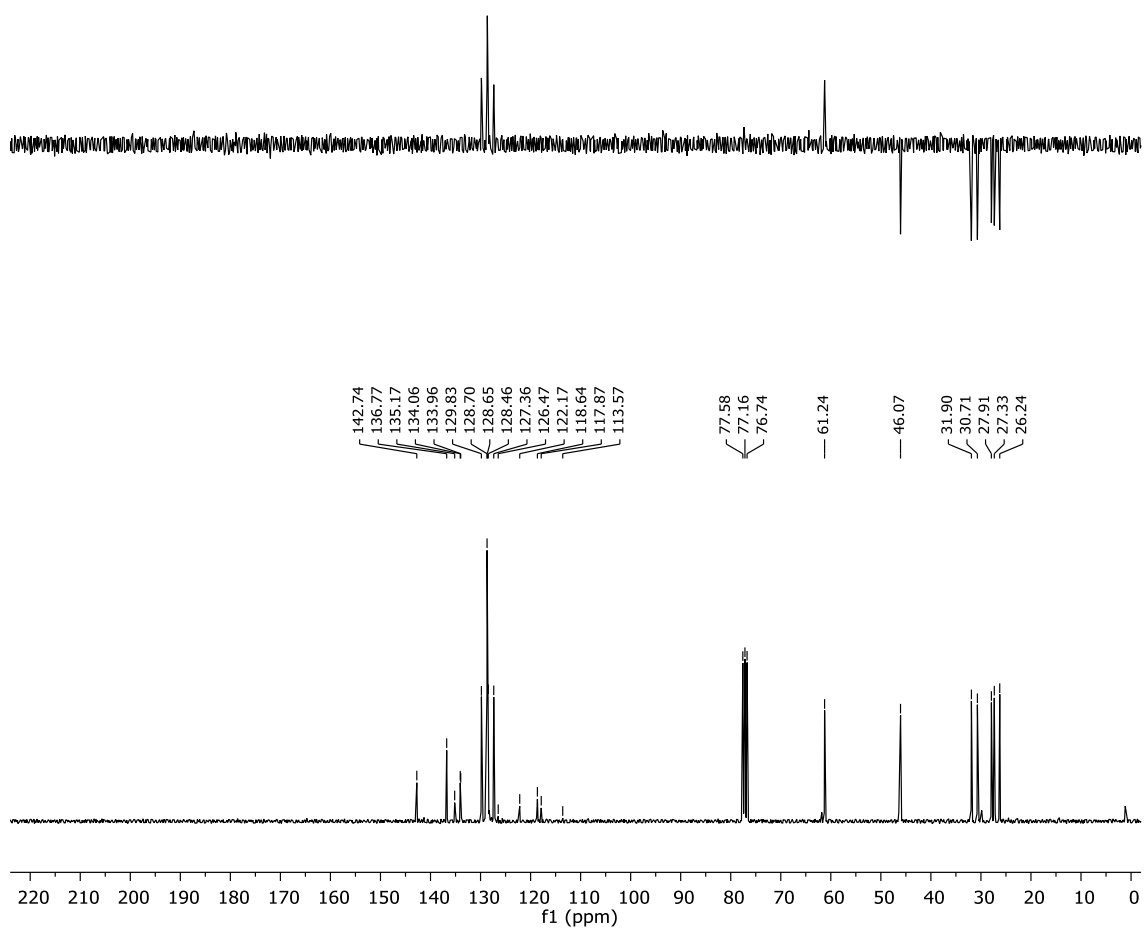

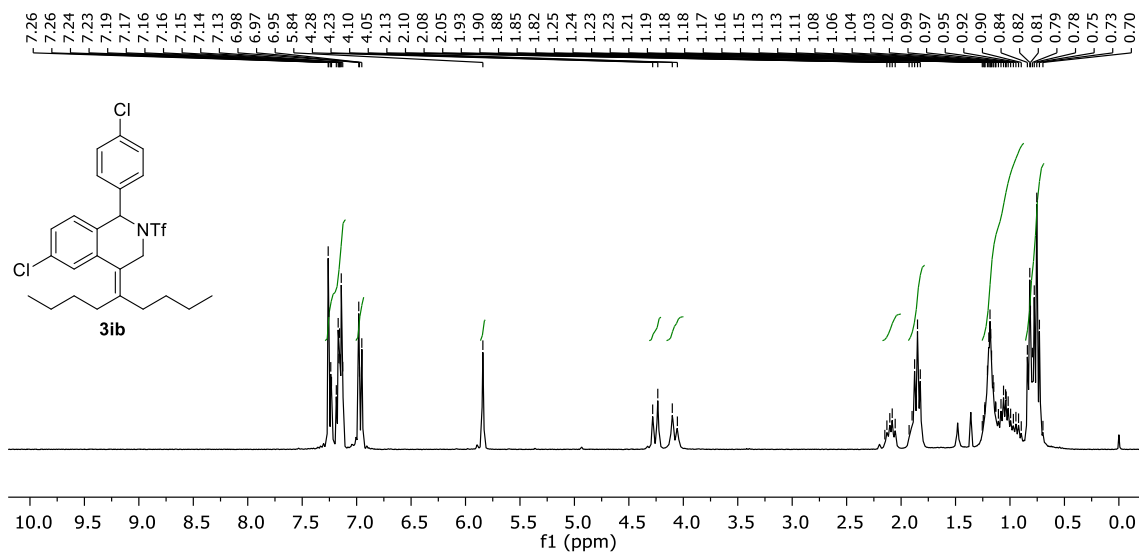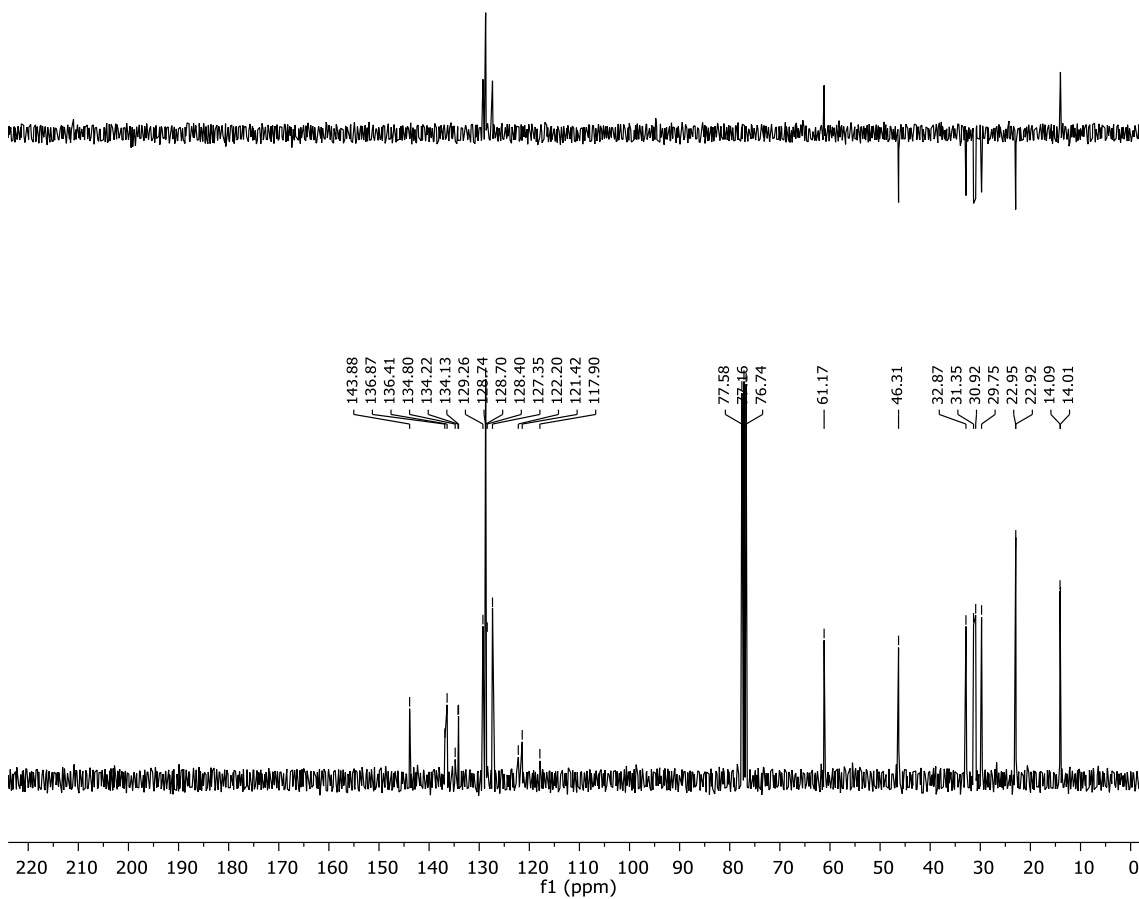



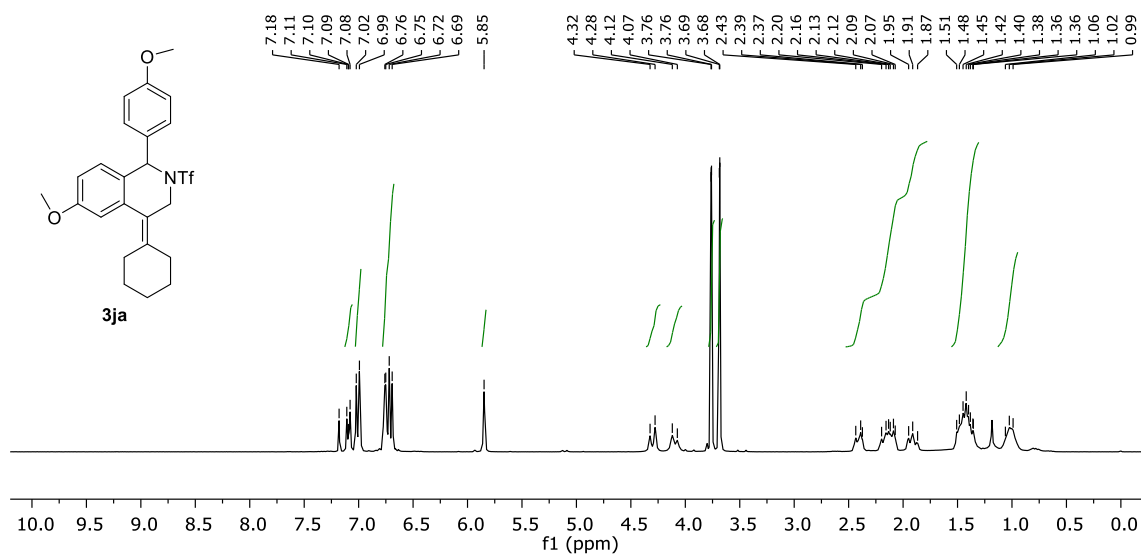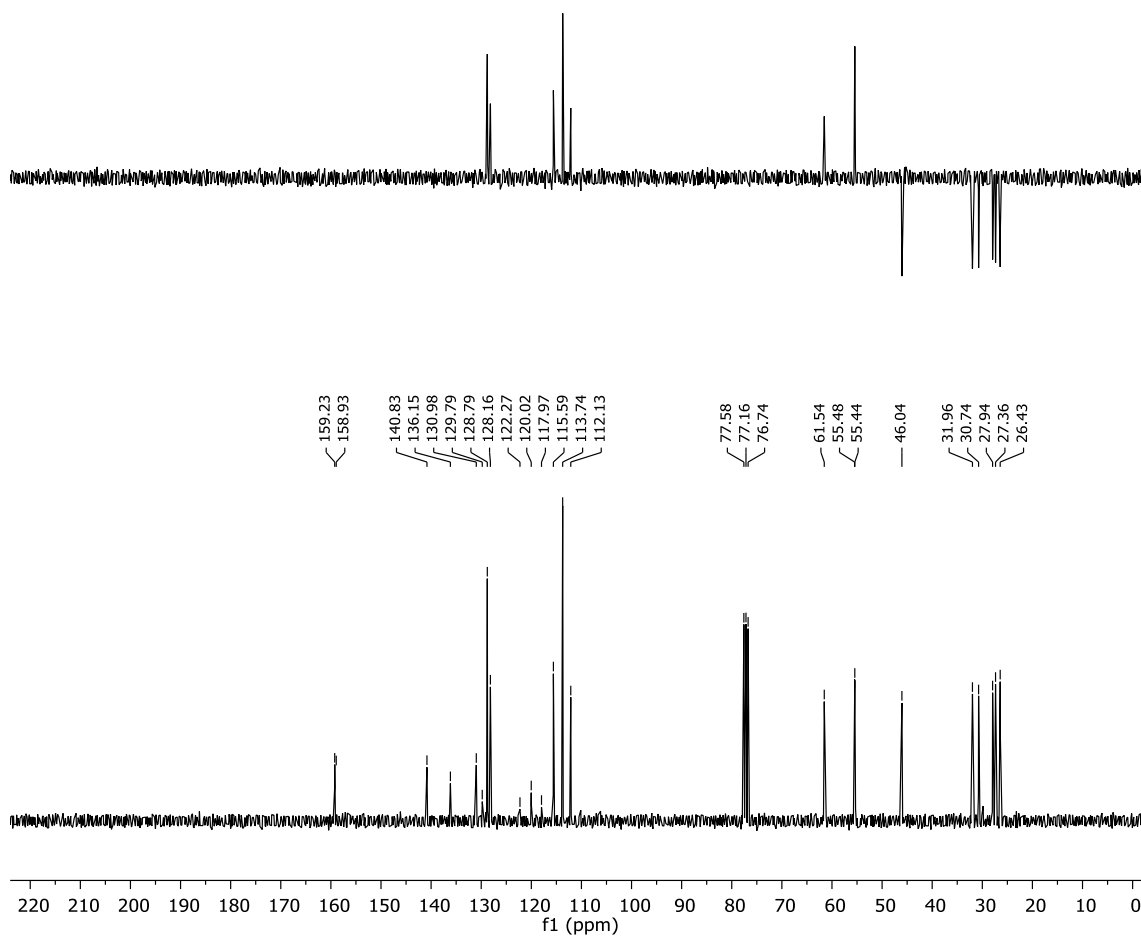

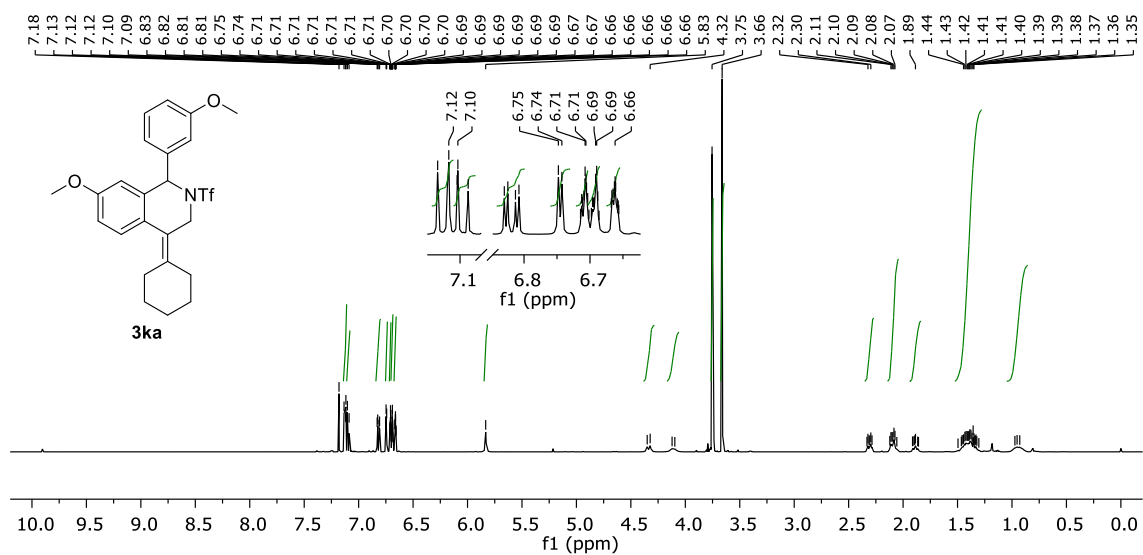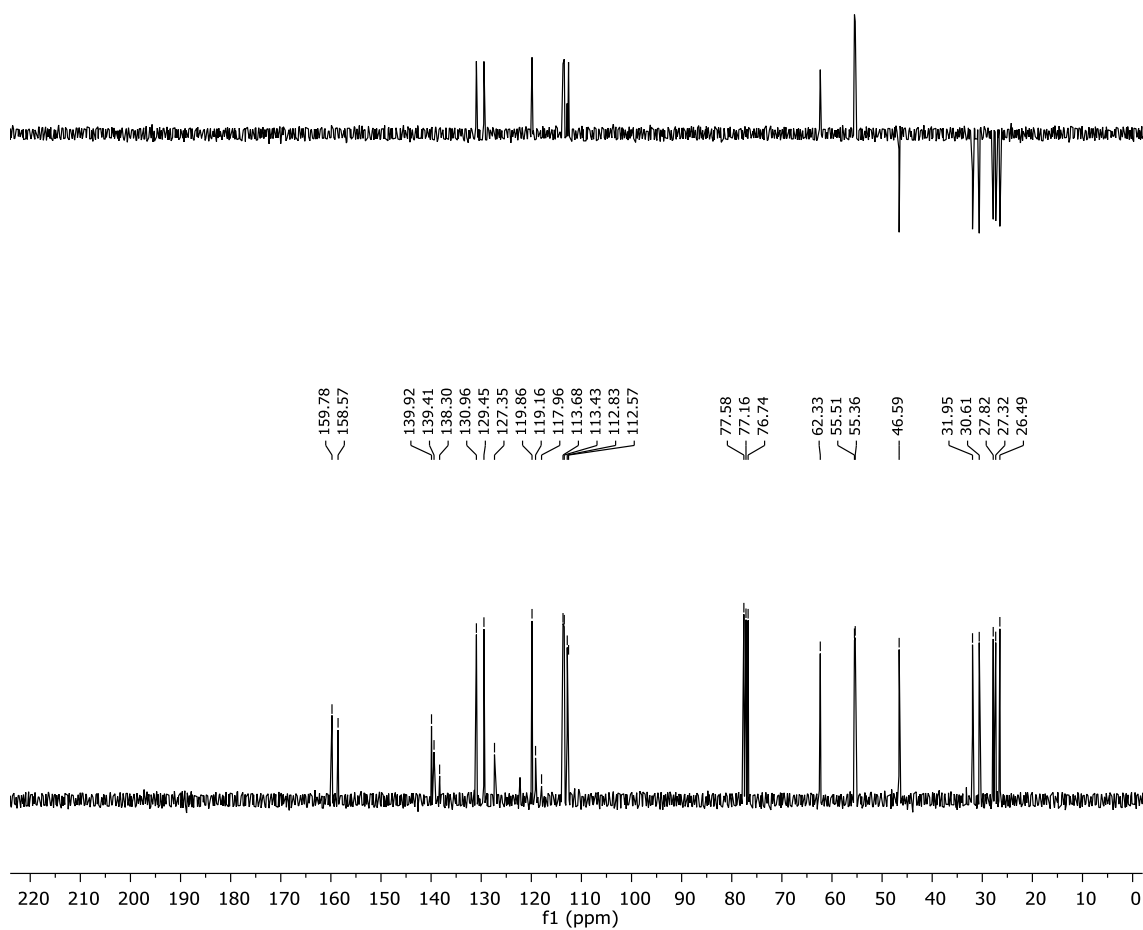

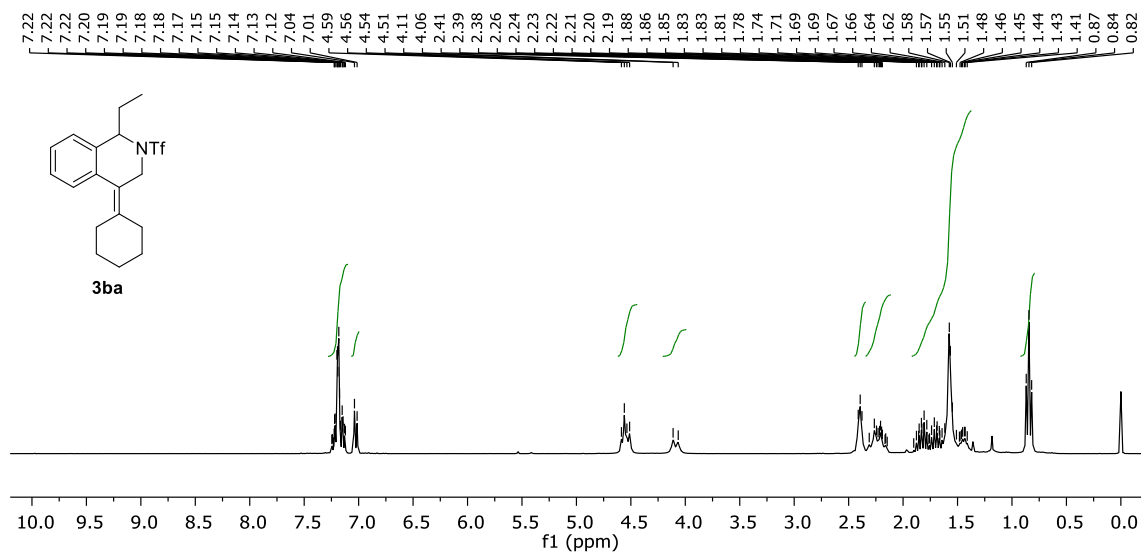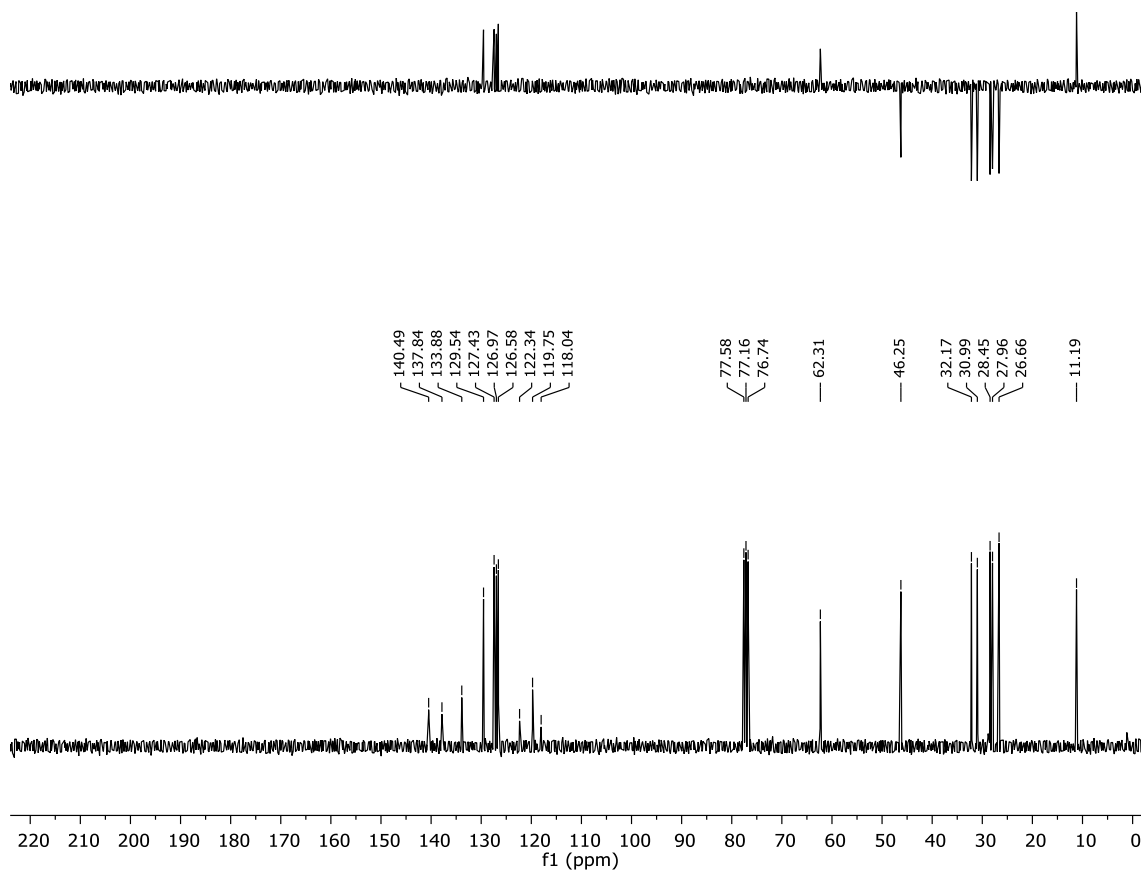

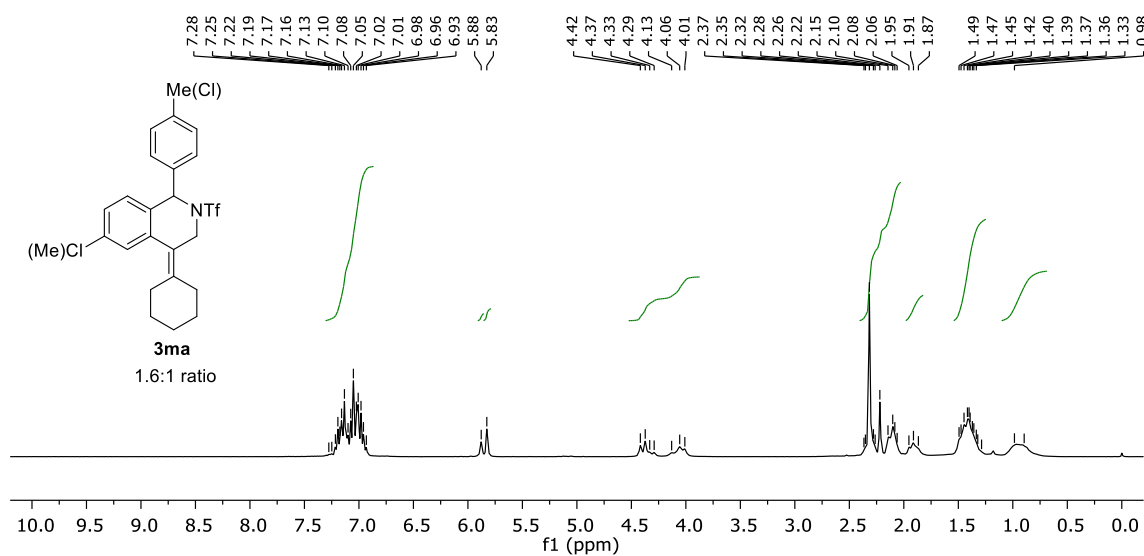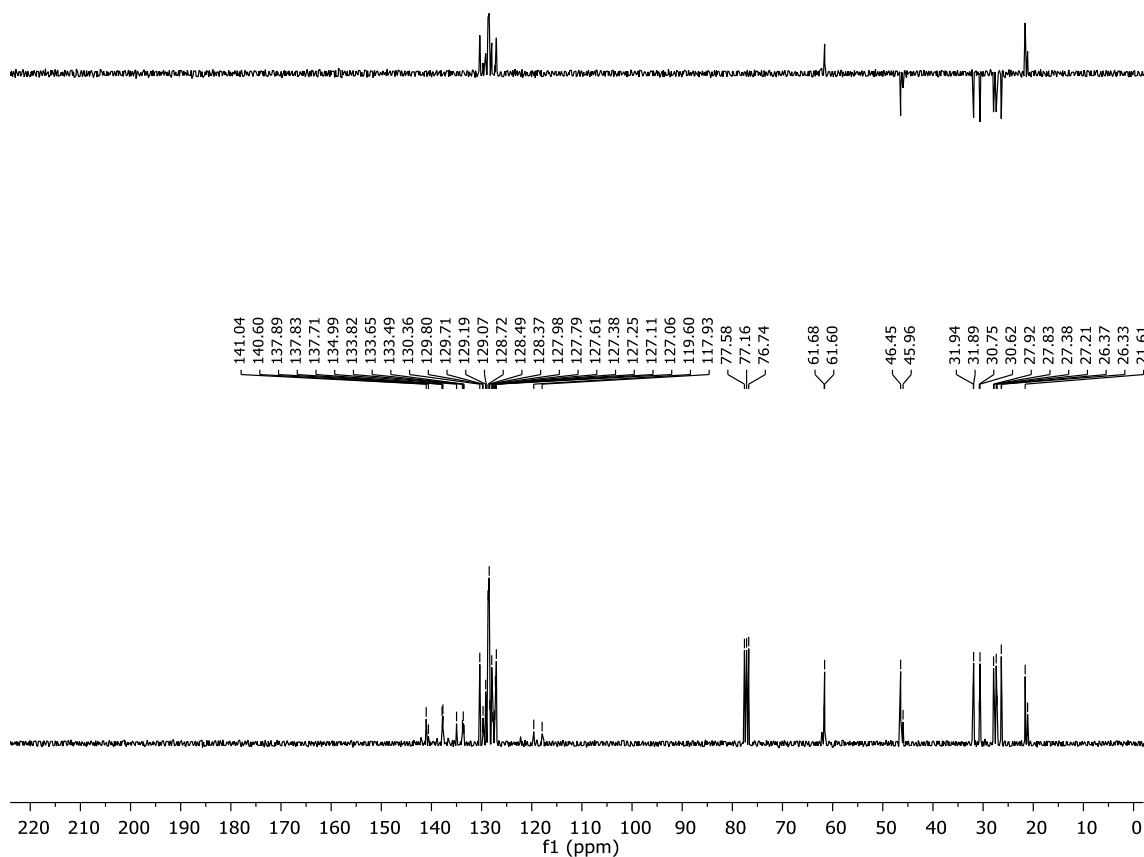

Supplement: Supplementary file 1 [file 14138564]
